# Supplementary material for: Identifying Candidate Circulating RNA Markers for Coronary Artery Disease by Deep RNA-Sequencing in Human Plasma
Source: Cells. 2022 Oct 11;11(20):3191. doi: 10.3390/cells11203191 (PMC9599983; doi:10.3390/cells11203191)
Supplement: Supplementary file 1 [file cells-11-03191-s001.zip]

Archive with 4 entries (4 files):
- Supplementary Methods and Figures.pdf
- SuppTableS1_mRNAslncRNAs.xlsx
- SuppTableS2_putativelncRNAs.xlsx
- SuppTableS3_circRNAs.xlsx
