# Supplementary material for: Identifying Candidate Circulating RNA Markers for Coronary Artery Disease by Deep RNA-Sequencing in Human Plasma
Source: Cells. 2022 Oct 11;11(20):3191. doi: 10.3390/cells11203191 (PMC9599983; doi:10.3390/cells11203191)
Supplement: Supplementary file 1 [file cells-11-03191-s001.zip › SuppTableS1_mRNAslncRNAs.xlsx]

## Sheet: Zoe mRNAs and lncRNAs
Gene name	ENSEMBL ID	Transcript type	Mean Number of Reads Mapping in Controls	Log2 Fold Change in Patients compared with Controls	Log2 Fold Change Standard Error	P-value Adjusted for Multiple Comparisons
STAG2	ENSG00000101972.18	protein_coding	2006.84	1.60792	0.121233	1.62e-36
NEUROD2	ENSG00000171532.5	protein_coding	2257.37	1.8897	0.154774	1.48e-31
MT-ND3	ENSG00000198840.2	protein_coding	48232.6	2.08693	0.178679	5.75e-29
MT-ND5	ENSG00000198786.2	protein_coding	218594	2.13395	0.186347	5.8e-28
MT-CO2	ENSG00000198712.1	protein_coding	299436	2.08039	0.182507	1e-27
MT-ND6	ENSG00000198695.2	protein_coding	112460	2.22028	0.195671	1.64e-27
MT-CYB	ENSG00000198727.2	protein_coding	139779	2.10324	0.186434	3.29e-27
MT-ND1	ENSG00000198888.2	protein_coding	618841	2.16062	0.194245	1.65e-26
MT-ATP6	ENSG00000198899.2	protein_coding	280505	2.00446	0.181285	3.33e-26
MT-ND4L	ENSG00000212907.2	protein_coding	16491.2	1.97652	0.179617	5.77e-26
AL035078.1	ENSG00000254584.2	lncRNA	673.248	1.7722	0.16125	6.48e-26
CXCL14	ENSG00000145824.13	protein_coding	145.743	1.98228	0.181668	1.4e-25
MT-CO1	ENSG00000198804.2	protein_coding	434596	2.0421	0.187684	1.84e-25
CCDC26	ENSG00000229140.10	lncRNA	6006.35	1.72478	0.159762	4.51e-25
MT-ND2	ENSG00000198763.3	protein_coding	547684	1.98074	0.184085	6.49e-25
MT-ND4	ENSG00000198886.2	protein_coding	409106	2.01468	0.187885	9.42e-25
MT-CO3	ENSG00000198938.2	protein_coding	135218	2.01191	0.188791	1.82e-24
BTN3A2	ENSG00000186470.14	protein_coding	1582.98	1.39077	0.132055	6.75e-24
MT-ATP8	ENSG00000228253.1	protein_coding	63002.2	2.05028	0.201973	3.25e-22
MTRNR2L12	ENSG00000269028.3	protein_coding	654.655	2.13443	0.222511	8.15e-20
AC009404.1	ENSG00000236255.2	lncRNA	229.89	1.57043	0.169262	1.5e-18
FGF23	ENSG00000118972.3	protein_coding	3154.53	1.55777	0.177054	1.14e-16
TRIM13	ENSG00000204977.10	protein_coding	1312.46	1.25134	0.16802	7.37e-12
HNRNPK	ENSG00000165119.21	protein_coding	8101.29	-0.500785	0.0685377	2.09e-11
ATP5MG	ENSG00000167283.8	protein_coding	2655.86	-0.581037	0.0800941	3.02e-11
LINC02245	ENSG00000237638.2	lncRNA	227.183	1.33344	0.189027	1.26e-10
MIR663AHG	ENSG00000227195.11	lncRNA	264.66	-2.26306	0.337271	1.36e-09
ZNF302	ENSG00000089335.21	protein_coding	4814.27	1.27348	0.19817	9e-09
NCALD	ENSG00000104490.18	protein_coding	7122.46	1.24516	0.200178	3.31e-08
FLII	ENSG00000177731.16	protein_coding	719.501	0.852516	0.150025	8.71e-07
RGPD4-AS1	ENSG00000230651.8	lncRNA	192.597	1.31751	0.233001	1.01e-06
ABCC3	ENSG00000108846.16	protein_coding	634.425	1.03719	0.19057	3.29e-06
PPP1R12A	ENSG00000058272.19	protein_coding	864.806	0.604073	0.112865	5.37e-06
AMFR	ENSG00000159461.15	protein_coding	262.341	1.12647	0.210812	5.56e-06
ELOB	ENSG00000103363.14	protein_coding	1052.52	-0.557833	0.105688	7.84e-06
TTC37	ENSG00000198677.11	protein_coding	284.475	0.939689	0.182576	1.55e-05
CLTC	ENSG00000141367.12	protein_coding	554.801	0.747248	0.147033	2.15e-05
RPL36AL	ENSG00000165502.7	protein_coding	2667.07	-0.787291	0.155494	2.35e-05
RMRP	ENSG00000269900.3	lncRNA	500.101	-1.03946	0.206754	2.75e-05
RAB5C	ENSG00000108774.14	protein_coding	760.029	-0.564313	0.112629	2.97e-05
KIAA0513	ENSG00000135709.12	protein_coding	578.064	0.928534	0.186142	3.29e-05
ATP6V1A	ENSG00000114573.10	protein_coding	232.181	0.8729	0.176527	4.06e-05
UBL5	ENSG00000198258.10	protein_coding	583.16	-0.543125	0.110804	4.94e-05
C6orf62	ENSG00000112308.13	protein_coding	338.885	0.629097	0.128997	5.54e-05
DYNLL2	ENSG00000264364.3	protein_coding	372.659	0.594189	0.122606	6.39e-05
HNRNPM	ENSG00000099783.12	protein_coding	2592.54	-0.331073	0.0690627	8.21e-05
PICALM	ENSG00000073921.18	protein_coding	882.532	0.534856	0.112345	9.56e-05
INF2	ENSG00000203485.13	protein_coding	394.952	0.891332	0.18795	0.000103564
COX6C	ENSG00000164919.11	protein_coding	2636.44	-0.578767	0.122777	0.000117769
CUL4B	ENSG00000158290.17	protein_coding	298.57	0.78605	0.167455	0.000128358
ATP6V1G1	ENSG00000136888.7	protein_coding	1069.03	-0.400073	0.0859259	0.000152807
AL360012.1	ENSG00000270103.3	lncRNA	1675.22	0.972882	0.209238	0.000155887
MED13	ENSG00000108510.10	protein_coding	452.043	0.848286	0.183069	0.000165838
TOMM5	ENSG00000175768.13	protein_coding	468.973	-0.704903	0.152169	0.000165838
RPL35A	ENSG00000182899.17	protein_coding	2989.11	-0.673748	0.145777	0.000172677
MACF1	ENSG00000127603.28	protein_coding	908.256	0.663445	0.143981	0.000181417
MSN	ENSG00000147065.17	protein_coding	9054.81	0.570681	0.123869	0.000181417
PIGN	ENSG00000197563.11	protein_coding	630.717	0.730739	0.159407	0.000200505
IL6ST	ENSG00000134352.20	protein_coding	941.297	0.815987	0.180205	0.000259065
GPM6A	ENSG00000150625.16	protein_coding	66007	1.14951	0.255347	0.000290426
ANKRD11	ENSG00000167522.16	protein_coding	1904.16	0.533997	0.118678	0.000290537
ATP5MPL	ENSG00000156411.9	protein_coding	1737.13	-0.429828	0.0956077	0.000292815
CTDSP2	ENSG00000175215.11	protein_coding	362.409	0.653355	0.145891	0.000314578
TUT4	ENSG00000134744.14	protein_coding	274.212	0.683964	0.153271	0.000335604
AD000090.1	ENSG00000283907.1	lncRNA	14545.3	0.651906	0.147052	0.00038091
DOCK7	ENSG00000116641.18	protein_coding	673.038	1.04399	0.237374	0.000441617
COA6	ENSG00000168275.15	protein_coding	136.428	-1.10742	0.251855	0.000441617
UHMK1	ENSG00000152332.16	protein_coding	496.449	0.495754	0.113638	0.000512477
ATP5PF	ENSG00000154723.12	protein_coding	1116.14	-0.50811	0.116584	0.00051767
SPTB	ENSG00000070182.21	protein_coding	492.834	0.897361	0.206517	0.000541245
DSE	ENSG00000111817.18	protein_coding	508.489	0.759296	0.17485	0.000541245
RPL9	ENSG00000163682.16	protein_coding	1304.6	-0.8044	0.185152	0.000541245
CCDC18	ENSG00000122483.17	protein_coding	664.081	0.750227	0.173109	0.000558099
HIPK3	ENSG00000110422.12	protein_coding	1276.13	0.394323	0.0922013	0.000715907
PTGES3	ENSG00000110958.16	protein_coding	1167.98	-0.295715	0.0695055	0.000783832
ATP6V1F	ENSG00000128524.5	protein_coding	471.22	-0.437487	0.103069	0.000812372
GTF2A1	ENSG00000165417.12	protein_coding	238.245	0.661653	0.156437	0.000861255
MSC-AS1	ENSG00000235531.11	lncRNA	147.84	0.825944	0.19692	0.000981189
PTPRJ	ENSG00000149177.13	protein_coding	3046.87	0.796391	0.190013	0.00098621
BRD3	ENSG00000169925.17	protein_coding	486.928	0.68949	0.165291	0.00105872
CLIP2	ENSG00000106665.16	protein_coding	413.8	0.810287	0.194792	0.00110496
RPA2	ENSG00000117748.10	protein_coding	120.368	-0.885445	0.213162	0.00112467
ITPRID2	ENSG00000138434.17	protein_coding	887.135	0.549086	0.13245	0.00114956
TMA7	ENSG00000232112.3	protein_coding	1396.69	-0.25411	0.0613025	0.00114956
SPOP	ENSG00000121067.19	protein_coding	177.954	-0.817594	0.19755	0.00117344
A1BG	ENSG00000121410.12	protein_coding	140.644	-0.955205	0.231147	0.00119612
ING3	ENSG00000071243.16	protein_coding	176.88	-0.865595	0.209586	0.00119954
H2AC19	ENSG00000272196.2	protein_coding	1781.99	-0.435718	0.105553	0.00120103
TAB2	ENSG00000055208.19	protein_coding	682.43	0.457961	0.11108	0.00121893
MTIF3	ENSG00000122033.14	protein_coding	199.872	-0.759825	0.184726	0.00125131
PPIA	ENSG00000196262.14	protein_coding	1862.08	-0.291674	0.0715781	0.00146554
WBP11	ENSG00000084463.8	protein_coding	543.176	-0.497467	0.122712	0.00159132
RPL34	ENSG00000109475.16	protein_coding	14969	-0.740835	0.182879	0.00159999
GREM1	ENSG00000166923.12	protein_coding	10273.8	1.05376	0.262541	0.00186133
NIFK	ENSG00000155438.12	protein_coding	318.729	-0.780578	0.194589	0.00186568
TTC1	ENSG00000113312.11	protein_coding	428.725	-0.43693	0.110006	0.00217302
NPM1	ENSG00000181163.13	protein_coding	3172.11	-0.417238	0.105266	0.00223309
RPS23	ENSG00000186468.13	protein_coding	10514	-0.713215	0.181098	0.00246553
SRP14	ENSG00000140319.11	protein_coding	2020.62	-0.437223	0.111215	0.00252022
PTMS	ENSG00000159335.16	protein_coding	418.961	0.467735	0.119126	0.00255465
RPL26	ENSG00000161970.15	protein_coding	16030.3	-0.701522	0.179436	0.00271996
CCDC88A	ENSG00000115355.17	protein_coding	407.516	0.498291	0.127793	0.00281986
DCTN1	ENSG00000204843.12	protein_coding	483.984	0.758542	0.195225	0.00296389
C11orf58	ENSG00000110696.10	protein_coding	2184.08	-0.276569	0.0712457	0.00298739
ARRB1	ENSG00000137486.17	protein_coding	642.295	0.442637	0.114188	0.00303061
UQCRQ	ENSG00000164405.11	protein_coding	285.464	-0.791366	0.204216	0.00303061
H3-3B	ENSG00000132475.10	protein_coding	2253.85	-0.378369	0.0976955	0.00303793
TBC1D15	ENSG00000121749.15	protein_coding	689.262	0.613459	0.158952	0.00319006
LRRC69	ENSG00000214954.8	protein_coding	158.342	0.818583	0.212508	0.0032523
SRSF10	ENSG00000188529.15	protein_coding	631.858	-0.457102	0.11872	0.0032523
NDUFAF2	ENSG00000164182.11	protein_coding	82.6399	-0.929937	0.241549	0.0032523
MINK1	ENSG00000141503.17	protein_coding	938.444	0.538743	0.140007	0.00325684
SENP7	ENSG00000138468.16	protein_coding	178.115	0.615249	0.160188	0.00331113
THOC7	ENSG00000163634.12	protein_coding	189.719	-0.484027	0.126545	0.0034789
RPS19BP1	ENSG00000187051.9	protein_coding	295.999	-0.593618	0.155234	0.0034789
RPL29	ENSG00000162244.12	protein_coding	8090.01	-0.617688	0.161451	0.0034789
RPL39	ENSG00000198918.8	protein_coding	3895.43	-0.658947	0.172567	0.00353564
CHD9	ENSG00000177200.17	protein_coding	2526.01	0.540477	0.141637	0.00355076
MYH9	ENSG00000100345.21	protein_coding	21430.7	0.658333	0.172603	0.00355464
SARNP	ENSG00000205323.9	protein_coding	369.817	-0.565885	0.148616	0.00362648
ARIH2	ENSG00000177479.19	protein_coding	461.935	-0.494649	0.130048	0.00366501
PPCS	ENSG00000127125.9	protein_coding	366.862	-0.508966	0.134034	0.00373703
SYK	ENSG00000165025.15	protein_coding	534.544	0.44388	0.117145	0.00383848
RPL13A	ENSG00000142541.17	protein_coding	24974.3	-0.760873	0.201271	0.00395342
RPL21	ENSG00000122026.10	protein_coding	13230.4	-0.646693	0.171266	0.00399984
CPEB4	ENSG00000113742.14	protein_coding	501.72	0.675809	0.17922	0.0040589
SSBP1	ENSG00000106028.11	protein_coding	325.935	-0.695528	0.184731	0.00412933
SEC11C	ENSG00000166562.9	protein_coding	120.916	-0.874875	0.232882	0.00424503
SKP1	ENSG00000113558.18	protein_coding	8285.43	-0.350111	0.0937104	0.00453011
RPS27	ENSG00000177954.14	protein_coding	14826.3	-0.615384	0.164706	0.00453011
RPL18A	ENSG00000105640.13	protein_coding	9438.16	-0.694292	0.185782	0.00453011
MYL12B	ENSG00000118680.13	protein_coding	4481.04	-0.270341	0.0725727	0.0047054
ATP2A3	ENSG00000074370.18	protein_coding	768.098	0.811735	0.218379	0.00482987
RC3H2	ENSG00000056586.16	protein_coding	764.012	0.559251	0.150787	0.00496156
ACTR2	ENSG00000138071.13	protein_coding	2723.33	-0.29976	0.0810149	0.00510855
EPN1	ENSG00000063245.14	protein_coding	283.644	0.835399	0.226397	0.00528591
UQCR10	ENSG00000184076.13	protein_coding	687.585	-0.364482	0.0993019	0.00567531
POLE3	ENSG00000148229.13	protein_coding	1115.13	-0.36807	0.100357	0.00567648
HNRNPDL	ENSG00000152795.17	protein_coding	700.334	-0.614529	0.167553	0.00567648
RPS15	ENSG00000115268.9	protein_coding	4019.84	-0.65383	0.178607	0.00579978
TNS1	ENSG00000079308.19	protein_coding	736.737	0.619259	0.170287	0.00631452
TWF2	ENSG00000247596.9	protein_coding	350.509	-0.41321	0.113641	0.00631452
CIRBP	ENSG00000099622.14	protein_coding	479.746	-0.431764	0.11879	0.0063153
POLR2A	ENSG00000181222.17	protein_coding	462.16	0.742401	0.204394	0.0063253
LRBA	ENSG00000198589.13	protein_coding	2455.94	0.527528	0.145262	0.0063253
RPL7	ENSG00000147604.14	protein_coding	3546.19	-0.637452	0.176221	0.00664774
STUM	ENSG00000203685.10	protein_coding	2676.88	0.806745	0.223826	0.00695345
MIF	ENSG00000240972.2	protein_coding	270.925	-0.670649	0.186857	0.00733433
NDUFB10	ENSG00000140990.15	protein_coding	409.383	-0.519504	0.144902	0.00736793
ATP5F1D	ENSG00000099624.8	protein_coding	571.538	-0.630749	0.17591	0.00736793
ELAVL1	ENSG00000066044.15	protein_coding	175.936	0.573995	0.160384	0.00751092
LYN	ENSG00000254087.8	protein_coding	1968.75	0.420276	0.11766	0.00767258
RFLNB	ENSG00000183688.4	protein_coding	409	0.504101	0.141382	0.00782403
ODC1	ENSG00000115758.13	protein_coding	1729.24	0.561872	0.157716	0.00787328
RPL23A	ENSG00000198242.14	protein_coding	21105.8	-0.609928	0.171811	0.00821709
BAZ2A	ENSG00000076108.11	protein_coding	380.912	0.766642	0.216296	0.00831006
VPS29	ENSG00000111237.19	protein_coding	235.206	-0.480966	0.135693	0.00831006
ANKRD17	ENSG00000132466.19	protein_coding	542.189	0.623703	0.176456	0.0085821
HOMER2	ENSG00000103942.13	protein_coding	494.601	0.718584	0.203391	0.00859166
ECE1	ENSG00000117298.16	protein_coding	527.484	0.904627	0.256442	0.00872637
MPP6	ENSG00000105926.15	protein_coding	301.363	0.60769	0.172402	0.0087752
POMP	ENSG00000132963.8	protein_coding	304.185	-0.474304	0.135171	0.00922773
ATP5PO	ENSG00000241837.7	protein_coding	639.373	-0.651595	0.185664	0.00922773
TOMM7	ENSG00000196683.10	protein_coding	495.084	-0.650888	0.185697	0.00931598
TAF1	ENSG00000147133.15	protein_coding	344.555	0.538062	0.153728	0.00943126
NCOR1	ENSG00000141027.21	protein_coding	1322.19	0.377195	0.107792	0.00943126
RPS20	ENSG00000008988.9	protein_coding	6068.63	-0.560281	0.160431	0.00958955
RDX	ENSG00000137710.16	protein_coding	433.403	0.482251	0.138256	0.00969713
RPS15A	ENSG00000134419.15	protein_coding	5553.19	-0.574669	0.164932	0.00979143
ARPC3	ENSG00000111229.16	protein_coding	2593.49	-0.374445	0.107673	0.00999161
USP9X	ENSG00000124486.13	protein_coding	508.745	0.70598	0.20429	0.0107872
ATP5PB	ENSG00000116459.11	protein_coding	524.733	-0.462209	0.1341	0.0111027
AC007991.3	ENSG00000253939.1	lncRNA	85.1301	0.914941	0.266153	0.0112027
MMRN1	ENSG00000138722.10	protein_coding	1223.28	0.681373	0.198186	0.0112027
RBM5	ENSG00000003756.17	protein_coding	582.204	-0.391522	0.113786	0.0112027
ATP6V0E1	ENSG00000113732.9	protein_coding	1013.27	-0.472794	0.137606	0.0112027
GIMAP7	ENSG00000179144.5	protein_coding	1561.68	-0.630792	0.183243	0.0112027
SNRPF	ENSG00000139343.10	protein_coding	470.016	-0.64815	0.188647	0.0112027
HINT1	ENSG00000169567.12	protein_coding	294.772	-0.694836	0.202042	0.0112027
RPS28	ENSG00000233927.5	protein_coding	1131.89	-0.514426	0.149864	0.0112817
C1QBP	ENSG00000108561.8	protein_coding	380.592	-0.668031	0.194678	0.0112817
CNN2	ENSG00000064666.15	protein_coding	845.043	-0.516824	0.151349	0.011944
GNA12	ENSG00000146535.14	protein_coding	202.02	0.597454	0.175281	0.0121663
EIF4G1	ENSG00000114867.20	protein_coding	329.57	0.740391	0.217295	0.0121689
OSBPL8	ENSG00000091039.17	protein_coding	729.415	0.435703	0.128106	0.0123943
VPS13C	ENSG00000129003.18	protein_coding	587.48	0.59295	0.174438	0.0124267
MRPS23	ENSG00000181610.13	protein_coding	191.656	-0.7127	0.210073	0.0126745
MPHOSPH9	ENSG00000051825.15	protein_coding	240.764	0.571876	0.168624	0.012676
SEPTIN11	ENSG00000138758.11	protein_coding	1437.72	0.543198	0.160452	0.0129017
BLOC1S1	ENSG00000135441.7	protein_coding	527.654	-0.526518	0.155738	0.013065
UBE2Q1	ENSG00000160714.10	protein_coding	365.223	0.513753	0.152238	0.0133028
MAGOH	ENSG00000162385.11	protein_coding	237.408	-0.678178	0.201175	0.0134201
WASF2	ENSG00000158195.11	protein_coding	874.526	0.524969	0.156109	0.0137131
TRNT1	ENSG00000072756.17	protein_coding	279.84	-0.490761	0.145919	0.0137131
TIMM13	ENSG00000099800.8	protein_coding	240.307	-0.683815	0.203673	0.0139265
ACSL4	ENSG00000068366.20	protein_coding	437.818	0.546112	0.163032	0.0142598
MSL1	ENSG00000188895.12	protein_coding	204.293	0.750521	0.224368	0.0143839
LMO2	ENSG00000135363.12	protein_coding	171.248	0.538967	0.16109	0.0143839
SHKBP1	ENSG00000160410.15	protein_coding	219.08	0.862624	0.258379	0.0146016
AP5M1	ENSG00000053770.12	protein_coding	142.371	0.701854	0.210213	0.0146016
ATP5IF1	ENSG00000130770.18	protein_coding	1263.19	-0.446895	0.133965	0.0146846
UBN1	ENSG00000118900.15	protein_coding	236.676	0.567521	0.17037	0.0148568
COX7C	ENSG00000127184.13	protein_coding	3888.79	-0.54452	0.163499	0.0148568
SERF2	ENSG00000140264.19	protein_coding	10697.6	-0.374007	0.112392	0.0149427
POLR2J	ENSG00000005075.15	protein_coding	738.481	-0.512714	0.154138	0.0149564
NEDD4	ENSG00000069869.16	protein_coding	320.567	0.648018	0.194986	0.0150536
KRCC1	ENSG00000172086.9	protein_coding	170.072	-0.560002	0.16869	0.0151944
KAT6B	ENSG00000156650.14	protein_coding	295.592	0.666949	0.20106	0.0152729
RP9	ENSG00000164610.9	protein_coding	100.339	-0.763212	0.230239	0.0153386
PRR13	ENSG00000205352.11	protein_coding	1068.9	-0.356058	0.107551	0.0155144
PRDX5	ENSG00000126432.14	protein_coding	698.158	-0.350373	0.105933	0.0156263
MGLL	ENSG00000074416.14	protein_coding	806.235	0.512516	0.155015	0.0156347
FKBP3	ENSG00000100442.11	protein_coding	329.693	-0.405997	0.122867	0.0156785
MRPS5	ENSG00000144029.12	protein_coding	341.495	-0.528297	0.159944	0.0156949
MITF	ENSG00000187098.15	protein_coding	251.339	0.62668	0.190089	0.0159855
USP34	ENSG00000115464.15	protein_coding	836.209	0.490922	0.14898	0.0160132
CCDC28A	ENSG00000024862.17	protein_coding	264.154	-0.495337	0.150798	0.0165563
RPL11	ENSG00000142676.14	protein_coding	6381.04	-0.5852	0.178264	0.0166102
RPL4	ENSG00000174444.15	protein_coding	4597.02	-0.448348	0.136866	0.0169598
ITGB5	ENSG00000082781.12	protein_coding	633.918	0.649652	0.198624	0.0171366
RPL30	ENSG00000156482.11	protein_coding	2458.75	-0.578209	0.176778	0.0171366
PFN1	ENSG00000108518.8	protein_coding	4229.21	-0.228218	0.069856	0.0173031
SIAH2	ENSG00000181788.4	protein_coding	393.658	0.543572	0.166483	0.0173128
ATP5F1E	ENSG00000124172.10	protein_coding	2898.16	-0.333007	0.102067	0.0173128
SVBP	ENSG00000177868.12	protein_coding	521.348	-0.42421	0.129982	0.0173128
POLR3GL	ENSG00000121851.13	protein_coding	573.795	-0.524416	0.160649	0.0173128
H1-2	ENSG00000187837.3	protein_coding	1200.18	-0.312021	0.0957098	0.0174053
FBRS	ENSG00000156860.16	protein_coding	455.008	0.613471	0.188552	0.0176774
CD52	ENSG00000169442.9	protein_coding	793.478	-0.591341	0.182156	0.0180137
GIMAP5	ENSG00000196329.11	protein_coding	226.982	-0.735638	0.226617	0.0180137
SELENOH	ENSG00000211450.10	protein_coding	669.137	-0.597555	0.184295	0.0181902
ORAI2	ENSG00000160991.16	protein_coding	296.35	0.536895	0.165683	0.0182441
NEDD8	ENSG00000129559.13	protein_coding	707.004	-0.270242	0.0835437	0.0185503
LTB	ENSG00000227507.2	protein_coding	873.952	-0.661789	0.204693	0.018592
ATF7IP	ENSG00000171681.12	protein_coding	949.638	0.406217	0.125894	0.0189467
SYF2	ENSG00000117614.10	protein_coding	1993.53	-0.383651	0.119074	0.0191929
RAB14	ENSG00000119396.11	protein_coding	587.47	0.452168	0.140558	0.0194566
MITD1	ENSG00000158411.11	protein_coding	758.152	-0.306363	0.0952615	0.0194566
GTF2F2	ENSG00000188342.12	protein_coding	199.176	-0.558321	0.173959	0.0198331
HBA2	ENSG00000188536.13	protein_coding	6056.9	-0.823184	0.256916	0.0201392
CCNI	ENSG00000118816.10	protein_coding	744.967	0.441894	0.137982	0.0201765
PFDN5	ENSG00000123349.14	protein_coding	2283.69	-0.437564	0.136885	0.0205287
RPL24	ENSG00000114391.13	protein_coding	4194.62	-0.565967	0.177401	0.0209057
SPTBN1	ENSG00000115306.16	protein_coding	1454.53	0.484846	0.152119	0.0209815
NDUFB1	ENSG00000183648.11	protein_coding	716.229	-0.505027	0.158429	0.0209815
SLC35E1	ENSG00000127526.15	protein_coding	351.123	0.591435	0.185985	0.0212336
TRIP12	ENSG00000153827.13	protein_coding	913.515	0.398747	0.125502	0.0212336
NIPBL	ENSG00000164190.19	protein_coding	654.778	0.393934	0.123961	0.0212336
COX4I1	ENSG00000131143.10	protein_coding	2716.96	-0.328276	0.103157	0.0212336
RPS27L	ENSG00000185088.14	protein_coding	460.636	-0.435347	0.136951	0.0212336
TRMT112	ENSG00000173113.6	protein_coding	250.518	-0.613409	0.192884	0.0212336
MRPL16	ENSG00000166902.5	protein_coding	196.032	-0.682032	0.21468	0.0212336
MRPL53	ENSG00000204822.7	protein_coding	270.692	-0.772035	0.243095	0.0212441
MICAL2	ENSG00000133816.15	protein_coding	241.951	0.840056	0.264974	0.0212842
BTBD1	ENSG00000064726.10	protein_coding	172.151	0.638	0.201092	0.0212842
CWF19L2	ENSG00000152404.15	protein_coding	313.582	-0.380715	0.120166	0.0212842
PSMA7	ENSG00000101182.15	protein_coding	750.798	-0.451194	0.142155	0.0212842
NDUFB9	ENSG00000147684.9	protein_coding	223.876	-0.451941	0.142501	0.0212842
SLC45A4	ENSG00000022567.9	protein_coding	520.327	-0.499444	0.157669	0.0212842
RPL36A	ENSG00000241343.9	protein_coding	7325.15	-0.517789	0.163374	0.0212842
RPS5	ENSG00000083845.9	protein_coding	2011.8	-0.570762	0.180143	0.0212842
GRK3	ENSG00000100077.15	protein_coding	565.803	0.49403	0.156236	0.0216265
BTF3	ENSG00000145741.15	protein_coding	1071.88	-0.4289	0.1357	0.0216626
GCC2	ENSG00000135968.21	protein_coding	655.605	0.745542	0.235971	0.0216808
AL365394.1	ENSG00000284809.1	lncRNA	205.9	0.894427	0.284942	0.0231593
BNIP3L	ENSG00000104765.16	protein_coding	5681.67	-0.503884	0.160559	0.0231593
GSTP1	ENSG00000084207.18	protein_coding	865.658	-0.526616	0.167994	0.0233692
SLC25A5	ENSG00000005022.6	protein_coding	549.629	-0.36913	0.117923	0.0236532
RALGPS2	ENSG00000116191.17	protein_coding	241.548	0.766412	0.245036	0.0237796
PCBP2	ENSG00000197111.15	protein_coding	2280.47	0.297676	0.0952544	0.0239226
IKBKG	ENSG00000269335.5	protein_coding	390.755	0.52113	0.166884	0.0240387
ITGA2B	ENSG00000005961.19	protein_coding	3676.89	0.817653	0.26192	0.0240406
RGS18	ENSG00000150681.10	protein_coding	26521.8	0.611208	0.196314	0.0245001
DENND4C	ENSG00000137145.20	protein_coding	649.461	0.517209	0.166085	0.0245001
PPM1A	ENSG00000100614.18	protein_coding	1753.49	0.457856	0.147045	0.0245001
MAN2A1	ENSG00000112893.9	protein_coding	580.06	0.642719	0.206867	0.0249232
LEO1	ENSG00000166477.13	protein_coding	164.372	-0.60955	0.196215	0.0249232
SMARCA2	ENSG00000080503.24	protein_coding	1207.8	0.378787	0.122311	0.0255884
ERICH1	ENSG00000104714.14	protein_coding	458.186	-0.43094	0.139129	0.0255884
PYURF	ENSG00000145337.5	protein_coding	301.004	-0.525284	0.169678	0.0256092
RPL6	ENSG00000089009.15	protein_coding	2683.76	-0.54159	0.175084	0.0257435
XPO7	ENSG00000130227.17	protein_coding	722.187	0.492406	0.15941	0.0260463
SDHA	ENSG00000073578.17	protein_coding	1309.33	0.842863	0.273185	0.0262855
AFF4	ENSG00000072364.13	protein_coding	298.231	0.697519	0.226292	0.0264662
TXNDC9	ENSG00000115514.12	protein_coding	129.873	-0.729513	0.236932	0.0266883
RPS6	ENSG00000137154.13	protein_coding	7645.86	-0.563541	0.183242	0.0269319
TMOD3	ENSG00000138594.14	protein_coding	1751.17	0.391921	0.127943	0.0279661
USP25	ENSG00000155313.15	protein_coding	776.296	-0.268981	0.0879185	0.028239
HBA1	ENSG00000206172.8	protein_coding	18054.2	-0.778656	0.254743	0.0284193
TPP2	ENSG00000134900.12	protein_coding	513.399	0.48963	0.160254	0.0284581
SHOC2	ENSG00000108061.11	protein_coding	1389.64	0.409486	0.13429	0.0288875
COX6A1	ENSG00000111775.3	protein_coding	404.138	-0.348033	0.114144	0.0288875
PIK3CB	ENSG00000051382.9	protein_coding	716.362	0.533427	0.175051	0.0288895
ERP29	ENSG00000089248.7	protein_coding	588.683	-0.485922	0.159461	0.0288895
EGF	ENSG00000138798.13	protein_coding	745.652	0.578359	0.189941	0.0290294
H1-4	ENSG00000168298.6	protein_coding	1941.59	-0.515229	0.169285	0.029078
AC103691.1	ENSG00000274383.1	lncRNA	107.999	0.701721	0.231371	0.0300397
BAG5	ENSG00000166170.9	protein_coding	213.61	-0.674146	0.222578	0.0303597
OPTN	ENSG00000123240.17	protein_coding	541.532	-0.546734	0.180663	0.0305271
ATP2C1	ENSG00000017260.19	protein_coding	583.743	0.500815	0.165636	0.0307101
RPS12	ENSG00000112306.8	protein_coding	2563.2	-0.51645	0.170894	0.0307767
MAT2B	ENSG00000038274.17	protein_coding	580.159	-0.316278	0.104741	0.0309362
GPD2	ENSG00000115159.16	protein_coding	370.795	0.645853	0.214216	0.0310641
SLBP	ENSG00000163950.13	protein_coding	642.33	-0.387118	0.128356	0.0310641
RNF7	ENSG00000114125.14	protein_coding	182.52	-0.555746	0.184437	0.0310641
ADAM17	ENSG00000151694.14	protein_coding	156.42	-0.667973	0.221672	0.0310641
PSMG4	ENSG00000180822.11	protein_coding	159.021	-0.681652	0.226079	0.0310641
DPY30	ENSG00000162961.14	protein_coding	114.524	-0.69866	0.231778	0.0310641
ATL3	ENSG00000184743.13	protein_coding	348.161	0.433998	0.144351	0.0315819
BANK1	ENSG00000153064.12	protein_coding	1655.18	0.387163	0.128849	0.0315819
CBX3	ENSG00000122565.19	protein_coding	1401.91	-0.26363	0.0877157	0.0315819
RPL36	ENSG00000130255.13	protein_coding	1968.95	-0.578022	0.192267	0.0315819
GMDS-DT	ENSG00000250903.9	lncRNA	139.479	0.734945	0.244971	0.0319785
UBC	ENSG00000150991.15	protein_coding	2298.62	0.241122	0.0804807	0.0321534
SNHG6	ENSG00000245910.8	lncRNA	2454.85	-0.344362	0.114943	0.0321534
MRPL42	ENSG00000198015.13	protein_coding	264.928	-0.66805	0.222873	0.0321534
RPS27A	ENSG00000143947.13	protein_coding	6406.72	-0.491659	0.164469	0.0327632
PCGF5	ENSG00000180628.15	protein_coding	6510.11	0.455257	0.152548	0.0332142
ATG12	ENSG00000145782.13	protein_coding	197.826	-0.471386	0.158002	0.0332237
RPL32	ENSG00000144713.13	protein_coding	2972.22	-0.52081	0.174734	0.0334423
PROX1	ENSG00000117707.16	protein_coding	72.9008	0.833306	0.280261	0.0340772
KMT2A	ENSG00000118058.22	protein_coding	327.938	0.681667	0.229338	0.0340772
RPS25	ENSG00000118181.11	protein_coding	2988.31	-0.516364	0.173718	0.0340772
RHOT1	ENSG00000126858.18	protein_coding	461.963	-0.340055	0.114469	0.0341632
C19orf53	ENSG00000104979.9	protein_coding	814.108	-0.415637	0.140067	0.0344386
LRRFIP1	ENSG00000124831.19	protein_coding	1771.74	0.275136	0.0927663	0.0345159
TUBA1B	ENSG00000123416.15	protein_coding	1610.63	0.299413	0.101052	0.0346014
CHTF8	ENSG00000168802.13	protein_coding	396.483	-0.351461	0.118604	0.0346014
ZNF438	ENSG00000183621.15	protein_coding	4474.9	-0.582805	0.196715	0.0346014
KATNAL1	ENSG00000102781.14	protein_coding	299.53	0.528934	0.178808	0.0349318
NDUFA3	ENSG00000170906.16	protein_coding	188.287	-0.524195	0.177186	0.0349318
AC068389.1	ENSG00000228862.4	lncRNA	177.271	0.749959	0.253703	0.0350217
XPA	ENSG00000136936.10	protein_coding	213.254	-0.704893	0.238486	0.0350217
TPST2	ENSG00000128294.16	protein_coding	481.409	0.594317	0.201211	0.0351561
FBXW5	ENSG00000159069.14	protein_coding	282.126	0.510826	0.173025	0.0352213
GHITM	ENSG00000165678.21	protein_coding	411.085	-0.418976	0.142112	0.0355074
FAM49B	ENSG00000153310.19	protein_coding	544.514	-0.286159	0.0971456	0.0357075
FNBP1L	ENSG00000137942.16	protein_coding	372.199	0.568355	0.193152	0.035978
PSME1	ENSG00000092010.15	protein_coding	2868.91	-0.463224	0.157582	0.036095
NACA	ENSG00000196531.12	protein_coding	8790.3	-0.473798	0.161203	0.036095
RPL17	ENSG00000265681.7	protein_coding	3417.36	-0.510391	0.173649	0.036095
TCF12	ENSG00000140262.17	protein_coding	231.196	0.618444	0.210619	0.0363304
TRAF3IP3	ENSG00000009790.15	protein_coding	524.478	-0.602636	0.20534	0.0364128
PSMD1	ENSG00000173692.13	protein_coding	189.447	0.707055	0.241427	0.0370417
MAN1A1	ENSG00000111885.7	protein_coding	307.341	0.55539	0.189707	0.0370417
ST13	ENSG00000100380.14	protein_coding	1862.24	-0.255956	0.0874663	0.0370417
RPL27	ENSG00000131469.14	protein_coding	8016.7	-0.511769	0.174839	0.0370417
PPP4R3A	ENSG00000100796.17	protein_coding	502.291	0.433326	0.148188	0.0372073
SNX2	ENSG00000205302.7	protein_coding	754.375	-0.438983	0.15026	0.0374342
GPS2	ENSG00000132522.16	protein_coding	791.678	-0.359312	0.123188	0.0377509
SRSF4	ENSG00000116350.17	protein_coding	749.047	-0.360076	0.123401	0.0377509
FAM200B	ENSG00000237765.7	protein_coding	263.464	-0.45158	0.154836	0.0377509
AC092445.1	ENSG00000286147.1	lncRNA	1703.85	0.790837	0.271263	0.0377925
CDK12	ENSG00000167258.14	protein_coding	283.126	0.497785	0.170934	0.0380913
PDAP1	ENSG00000106244.13	protein_coding	1446.59	-0.268486	0.092291	0.038177
GSTK1	ENSG00000197448.14	protein_coding	495.552	-0.32812	0.112769	0.038177
RPL31	ENSG00000071082.11	protein_coding	3436.93	-0.492109	0.169122	0.038177
CHD8	ENSG00000100888.14	protein_coding	231.073	0.604066	0.207824	0.0383887
RPL5	ENSG00000122406.14	protein_coding	5488.25	-0.527621	0.181627	0.0384967
LINC02558	ENSG00000230866.2	lncRNA	142.914	0.684405	0.235794	0.0385415
PALM2AKAP2	ENSG00000157654.19	protein_coding	477.693	0.591138	0.203678	0.0385415
RPS16	ENSG00000105193.9	protein_coding	1555.96	-0.532875	0.183553	0.0385415
RSL1D1	ENSG00000171490.13	protein_coding	672.116	-0.494767	0.170581	0.0386741
BICD2	ENSG00000185963.14	protein_coding	775.27	0.4714	0.163165	0.0399077
SMCHD1	ENSG00000101596.15	protein_coding	581.264	0.528261	0.18298	0.0399827
VRK1	ENSG00000100749.8	protein_coding	230.961	0.472708	0.163715	0.0399827
MECOM	ENSG00000085276.19	protein_coding	1162.75	0.96044	0.33306	0.0402658
ATXN2L	ENSG00000168488.18	protein_coding	229.587	0.673523	0.23385	0.0402658
MLLT10	ENSG00000078403.17	protein_coding	202.304	0.625952	0.217383	0.0402658
EIF3H	ENSG00000147677.11	protein_coding	771.882	-0.468568	0.162663	0.0402658
RPL27A	ENSG00000166441.13	protein_coding	3413.81	-0.491727	0.170674	0.0402658
RPS13	ENSG00000110700.7	protein_coding	1081.04	-0.515414	0.178815	0.0402658
ECPAS	ENSG00000136813.14	protein_coding	469.077	0.57881	0.201087	0.0403102
AKT2	ENSG00000105221.18	protein_coding	122.232	0.777325	0.270234	0.0403918
NDUFA4	ENSG00000189043.10	protein_coding	719.317	-0.422489	0.146926	0.0403918
LCK	ENSG00000182866.17	protein_coding	191.423	-0.656209	0.228189	0.0403918
TLE5	ENSG00000104964.14	protein_coding	1292.84	-0.428061	0.148959	0.0405334
SUPT6H	ENSG00000109111.15	protein_coding	527.949	0.547543	0.19084	0.0410274
SLC12A5	ENSG00000124140.13	protein_coding	88.3163	0.858145	0.299275	0.0410488
DIAPH1	ENSG00000131504.17	protein_coding	2526.79	0.391529	0.136646	0.0410488
DCTN2	ENSG00000175203.15	protein_coding	391.948	-0.357991	0.124845	0.0410488
RPL37	ENSG00000145592.14	protein_coding	4941.48	-0.484571	0.169037	0.0410488
HMGN4	ENSG00000182952.5	protein_coding	193.29	-0.5272	0.183983	0.0410488
ZNF148	ENSG00000163848.19	protein_coding	577.105	-0.345811	0.120736	0.0410957
SSH1	ENSG00000084112.15	protein_coding	368.054	0.481863	0.168293	0.0411244
EIF3E	ENSG00000104408.10	protein_coding	590.81	-0.483975	0.16912	0.0412244
NAA20	ENSG00000173418.12	protein_coding	77.6731	-0.72794	0.254653	0.0415447
CFAP36	ENSG00000163001.11	protein_coding	222.03	-0.566938	0.198471	0.0417157
TPI1	ENSG00000111669.15	protein_coding	1563.99	-0.246571	0.0864756	0.0423067
PTRHD1	ENSG00000184924.5	protein_coding	119.263	-0.572193	0.200787	0.0424213
ETFRF1	ENSG00000205707.11	protein_coding	546.355	-0.456479	0.160303	0.0425952
DNAJA1	ENSG00000086061.16	protein_coding	1266.11	-0.488101	0.171444	0.0425952
CTNNB1	ENSG00000168036.18	protein_coding	215.967	0.660643	0.232252	0.0428326
LIMS1	ENSG00000169756.16	protein_coding	8975.56	0.489604	0.172453	0.0433764
METTL5	ENSG00000138382.15	protein_coding	124.478	-0.601383	0.211808	0.0433764
PTP4A2	ENSG00000184007.21	protein_coding	3371.49	0.326296	0.115075	0.0437637
MAPKAPK2	ENSG00000162889.10	protein_coding	421.039	0.41905	0.147982	0.0438852
CNBP	ENSG00000169714.16	protein_coding	1514.33	-0.498277	0.175873	0.0438852
GLRX	ENSG00000173221.14	protein_coding	345.926	-0.559183	0.197439	0.0438852
NAA10	ENSG00000102030.16	protein_coding	122.384	-0.646397	0.228131	0.0438852
RPS7	ENSG00000171863.15	protein_coding	4133.26	-0.493283	0.174358	0.0440513
LSM6	ENSG00000164167.12	protein_coding	525.809	-0.558263	0.197307	0.0440513
AKT1	ENSG00000142208.16	protein_coding	275.503	0.603182	0.213352	0.0441281
ARGLU1	ENSG00000134884.15	protein_coding	388.768	-0.507168	0.17935	0.0441281
MRPS35	ENSG00000061794.13	protein_coding	197.209	-0.399283	0.141398	0.0443962
SNRPB	ENSG00000125835.18	protein_coding	260.109	-0.551851	0.195395	0.0443962
RPS29	ENSG00000213741.10	protein_coding	624.564	-0.494474	0.175296	0.0447185
GTPBP2	ENSG00000172432.19	protein_coding	298.694	0.546209	0.193756	0.0448633
TRIP11	ENSG00000100815.12	protein_coding	608.08	0.434769	0.154425	0.045277
GDI2	ENSG00000057608.17	protein_coding	1521.79	-0.289772	0.103062	0.0457135
SCAI	ENSG00000173611.17	protein_coding	153.612	-0.646147	0.22988	0.04573
TRAK2	ENSG00000115993.13	protein_coding	2445.03	0.632026	0.224991	0.0458391
AC004151.1	ENSG00000180448.10	protein_coding	946.628	0.386428	0.137585	0.0458391
ZCCHC7	ENSG00000147905.17	protein_coding	410.4	-0.351844	0.125413	0.0460907
FAM107B	ENSG00000065809.13	protein_coding	767.176	-0.408189	0.145496	0.0460907
PDE4D	ENSG00000113448.19	protein_coding	364.635	0.588396	0.210084	0.0466701
CBFB	ENSG00000067955.15	protein_coding	229.868	0.532986	0.19044	0.0467195
EEF1B2	ENSG00000114942.14	protein_coding	2514.85	-0.484293	0.17299	0.0467195
EIF4A3	ENSG00000141543.12	protein_coding	172.328	-0.655925	0.234396	0.0467195
DNAJC8	ENSG00000126698.11	protein_coding	733.953	-0.362724	0.129703	0.0467227
LYPLA1	ENSG00000120992.18	protein_coding	425.533	-0.48059	0.171868	0.0467227
PSMA3	ENSG00000100567.13	protein_coding	168.008	-0.572493	0.204701	0.0467227
NDUFAB1	ENSG00000004779.10	protein_coding	283.041	-0.585879	0.209604	0.0467828
PLEKHO1	ENSG00000023902.14	protein_coding	1758.28	0.326375	0.116834	0.0469286
COX7A2	ENSG00000112695.11	protein_coding	181.178	-0.486286	0.174351	0.0474665
MRPL50	ENSG00000136897.8	protein_coding	188.488	-0.616517	0.221317	0.0478731
PPP2R5C	ENSG00000078304.19	protein_coding	439.997	-0.393359	0.141283	0.0478906
LGALS3	ENSG00000131981.16	protein_coding	353.635	-0.577285	0.207333	0.0478906
SPAG9	ENSG00000008294.21	protein_coding	237.595	0.509437	0.183287	0.0484946
RPL28	ENSG00000108107.14	protein_coding	6046.23	-0.436277	0.157097	0.0485221
CNOT6L	ENSG00000138767.13	protein_coding	472.827	-0.444154	0.159871	0.0485221
TAF9	ENSG00000273841.5	protein_coding	145.713	-0.565046	0.203495	0.0485221
DEF8	ENSG00000140995.16	protein_coding	146.746	-0.672691	0.242275	0.0485221
RPL41	ENSG00000229117.9	protein_coding	2958.9	-0.251741	0.0907564	0.0488336
HNRNPUL1	ENSG00000105323.17	protein_coding	686.476	0.436659	0.157726	0.0495403
SH2B3	ENSG00000111252.11	protein_coding	342.745	0.399355	0.144306	0.0495499
AURKAIP1	ENSG00000175756.13	protein_coding	293.036	-0.541534	0.195708	0.0495499
MAP4K4	ENSG00000071054.16	protein_coding	872.431	0.405797	0.147093	0.0506137
RPL35	ENSG00000136942.15	protein_coding	3632.91	-0.463186	0.167862	0.0506137
NBDY	ENSG00000204272.13	protein_coding	205.319	-0.496117	0.180197	0.0513821
ATP8A1	ENSG00000124406.16	protein_coding	851.817	0.56964	0.207909	0.0533606
DBN1	ENSG00000113758.13	protein_coding	471.521	0.47307	0.172688	0.0533606
NCOA2	ENSG00000140396.13	protein_coding	551.817	0.398636	0.145657	0.05358
DBI	ENSG00000155368.16	protein_coding	1274.73	-0.528979	0.193286	0.05358
SRSF3	ENSG00000112081.17	protein_coding	416.538	0.379741	0.138986	0.0542162
CEP350	ENSG00000135837.16	protein_coding	852.84	0.4895	0.179317	0.0543955
RPS4X	ENSG00000198034.11	protein_coding	3522.12	-0.483623	0.17714	0.0543955
TBK1	ENSG00000183735.10	protein_coding	399.277	-0.334302	0.122563	0.054651
FN3K	ENSG00000167363.14	protein_coding	301.077	0.704008	0.258207	0.0547175
FAM122B	ENSG00000156504.16	protein_coding	308.152	0.522795	0.19192	0.0549128
DUT	ENSG00000128951.14	protein_coding	177.37	-0.691905	0.253941	0.0549128
BCAS2	ENSG00000116752.6	protein_coding	114.159	-0.635529	0.233654	0.0554838
SMC4	ENSG00000113810.16	protein_coding	483.487	0.335533	0.123403	0.0555344
NIN	ENSG00000100503.24	protein_coding	779.6	0.364312	0.134164	0.0560243
SNRPC	ENSG00000124562.10	protein_coding	415.189	-0.488628	0.180079	0.0562577
TC2N	ENSG00000165929.13	protein_coding	774.436	0.429105	0.158372	0.0568164
COX20	ENSG00000203667.10	protein_coding	222.784	-0.536835	0.198186	0.0568291
CNTLN	ENSG00000044459.15	protein_coding	949.094	0.384113	0.141922	0.0571002
RPL8	ENSG00000161016.17	protein_coding	3826.16	-0.469038	0.17363	0.0578764
UBA52	ENSG00000221983.8	protein_coding	2215.48	-0.278104	0.103075	0.0582227
TP53TG1	ENSG00000182165.18	lncRNA	98.0096	-0.604436	0.223974	0.0582227
RCOR3	ENSG00000117625.13	protein_coding	266.106	0.437471	0.162186	0.0582331
YWHAB	ENSG00000166913.13	protein_coding	1728.75	-0.372276	0.138048	0.0582331
MOB3C	ENSG00000142961.14	protein_coding	217.597	0.485663	0.180185	0.0583569
TOP2B	ENSG00000077097.15	protein_coding	432.86	0.432618	0.16068	0.058759
PHF11	ENSG00000136147.18	protein_coding	304.415	-0.533179	0.198108	0.058833
RYBP	ENSG00000163602.10	protein_coding	1024.01	0.468715	0.174359	0.0592727
ABR	ENSG00000159842.15	protein_coding	206.252	0.637422	0.237377	0.0596833
HDLBP	ENSG00000115677.17	protein_coding	579.143	0.516877	0.192547	0.0597212
RBBP4	ENSG00000162521.19	protein_coding	505.047	-0.288477	0.107592	0.0601801
LCP1	ENSG00000136167.14	protein_coding	3229.68	-0.476559	0.177928	0.0605746
RPL15	ENSG00000174748.21	protein_coding	6554.28	-0.367566	0.137329	0.0607919
SH3BGRL3	ENSG00000142669.15	protein_coding	18852.7	-0.426404	0.159363	0.0608307
OAZ2	ENSG00000180304.14	protein_coding	706.283	0.830852	0.310875	0.0612716
CMAS	ENSG00000111726.13	protein_coding	109.556	0.516183	0.193314	0.0616006
CRTAP	ENSG00000170275.15	protein_coding	463.576	0.534473	0.200355	0.0617812
H2AC11	ENSG00000196787.3	protein_coding	1130.42	-0.23039	0.0863777	0.0617812
CWC15	ENSG00000150316.12	protein_coding	239.147	-0.486879	0.182459	0.0617812
CCT4	ENSG00000115484.15	protein_coding	221.123	-0.520124	0.195048	0.0617812
SF3B2	ENSG00000087365.16	protein_coding	776.517	0.406	0.152357	0.0620062
OTUD6B-AS1	ENSG00000253738.2	lncRNA	531.631	-0.299882	0.112663	0.0624507
UBXN1	ENSG00000162191.13	protein_coding	1318.72	-0.471911	0.177362	0.0625239
AL135905.2	ENSG00000285976.2	protein_coding	537.157	0.430101	0.161705	0.0625803
RBMX	ENSG00000147274.14	protein_coding	497.431	-0.466928	0.175692	0.062863
CMIP	ENSG00000153815.16	protein_coding	1387.88	0.443542	0.166954	0.0629264
THBS1	ENSG00000137801.11	protein_coding	4180.91	0.572191	0.215479	0.0630399
SKAP2	ENSG00000005020.13	protein_coding	3527.87	0.432586	0.16314	0.0636374
ATP2A2	ENSG00000174437.17	protein_coding	354.076	0.557762	0.210864	0.0645108
UQCR11	ENSG00000127540.12	protein_coding	956.094	0.284022	0.107361	0.0645108
NDUFA8	ENSG00000119421.7	protein_coding	78.1603	-0.56731	0.214409	0.0645108
MADD	ENSG00000110514.19	protein_coding	569.893	0.452942	0.171304	0.0645898
GNAI2	ENSG00000114353.17	protein_coding	2279.77	0.250756	0.095046	0.0655902
PDGFC	ENSG00000145431.11	protein_coding	274.326	0.600436	0.227994	0.0658266
RPL38	ENSG00000172809.13	protein_coding	4545.64	-0.418856	0.159061	0.0658266
COMMD6	ENSG00000188243.12	protein_coding	1040.17	-0.470408	0.178595	0.0658266
COA8	ENSG00000256053.7	protein_coding	172.145	-0.483254	0.18342	0.0658266
SSR3	ENSG00000114850.6	protein_coding	200.274	-0.507499	0.192722	0.0658266
AL158835.1	ENSG00000228021.7	lncRNA	157.162	0.762473	0.289993	0.0664879
VAMP4	ENSG00000117533.15	protein_coding	249.461	-0.453131	0.172431	0.0666382
NCOA3	ENSG00000124151.19	protein_coding	652.558	0.458898	0.174787	0.0669413
ERV3-1	ENSG00000213462.5	protein_coding	371.593	-0.719058	0.273914	0.0669413
PHACTR2	ENSG00000112419.14	protein_coding	327.276	0.43498	0.165822	0.0670018
C12orf57	ENSG00000111678.11	protein_coding	326.443	-0.309949	0.118167	0.0670018
H4C11	ENSG00000197238.4	protein_coding	735.358	-0.500768	0.190899	0.0670018
HUWE1	ENSG00000086758.16	protein_coding	685.635	0.419287	0.159971	0.0672648
USP39	ENSG00000168883.20	protein_coding	260.561	-0.423045	0.161496	0.0673674
PPA1	ENSG00000180817.12	protein_coding	122.584	-0.629517	0.24034	0.0673674
VPS28	ENSG00000160948.14	protein_coding	242.669	-0.419672	0.160285	0.067387
RPL12	ENSG00000197958.13	protein_coding	5955.29	-0.474763	0.181426	0.0674865
RPL23	ENSG00000125691.13	protein_coding	5028.98	-0.462559	0.176845	0.0676071
ELMO2	ENSG00000062598.18	protein_coding	123.061	0.496007	0.189712	0.0677041
HTATSF1	ENSG00000102241.12	protein_coding	460.547	0.550527	0.211031	0.0686962
FIS1	ENSG00000214253.9	protein_coding	217.756	-0.426038	0.163358	0.0686962
RALA	ENSG00000006451.8	protein_coding	140.152	-0.467264	0.179193	0.0686962
SLIRP	ENSG00000119705.10	protein_coding	282.481	-0.507969	0.194839	0.0686962
H4C3	ENSG00000197061.4	protein_coding	671.751	-0.452611	0.173674	0.068782
ZEB2	ENSG00000169554.21	protein_coding	2243.17	0.287801	0.110503	0.0689891
STRN4	ENSG00000090372.15	protein_coding	548.015	0.496182	0.190724	0.0693304
MIB1	ENSG00000101752.11	protein_coding	209.886	0.455749	0.175151	0.0693304
RCAN3	ENSG00000117602.12	protein_coding	1168	-0.38277	0.147165	0.0693317
RAF1	ENSG00000132155.12	protein_coding	187.125	-0.513634	0.197601	0.0695386
MAST4-AS1	ENSG00000229666.1	lncRNA	131.759	-0.702268	0.270295	0.0696589
RPL18	ENSG00000063177.13	protein_coding	2182.85	-0.461208	0.177707	0.0701127
CISD2	ENSG00000145354.12	protein_coding	170.426	-0.582531	0.224737	0.0706592
PDE10A	ENSG00000112541.15	protein_coding	411.65	0.814856	0.314559	0.0708625
FHL1	ENSG00000022267.19	protein_coding	669.651	0.603374	0.233117	0.0711881
WASHC3	ENSG00000120860.11	protein_coding	360.559	-0.282984	0.10938	0.0712917
SNRPD1	ENSG00000167088.11	protein_coding	670.281	-0.523486	0.202384	0.0712917
MAPK1IP1L	ENSG00000168175.15	protein_coding	637.433	-0.428747	0.165867	0.0714429
PSMD12	ENSG00000197170.10	protein_coding	265.594	-0.448492	0.173598	0.0714429
GTF2H5	ENSG00000272047.3	protein_coding	224.513	-0.504639	0.195321	0.0714429
FBXL17	ENSG00000145743.16	protein_coding	296.451	-0.514729	0.199161	0.0714429
SLC25A39	ENSG00000013306.16	protein_coding	254.642	-0.637575	0.246881	0.0715244
MPC2	ENSG00000143158.11	protein_coding	139.096	-0.435419	0.168932	0.0724526
ITGB3	ENSG00000259207.8	protein_coding	10295.3	0.645456	0.25102	0.0736243
EXOC3	ENSG00000180104.16	protein_coding	248.69	0.539453	0.209984	0.0739923
EXOC6	ENSG00000138190.17	protein_coding	224.864	0.585837	0.228676	0.0749287
SND1	ENSG00000197157.11	protein_coding	194.921	0.567379	0.221362	0.0749287
SMAD2	ENSG00000175387.16	protein_coding	935.066	0.341	0.133165	0.0749287
H2AC17	ENSG00000278677.1	protein_coding	787.255	-0.361868	0.141235	0.0749287
ATP5PD	ENSG00000167863.12	protein_coding	658.717	-0.397866	0.155376	0.0749287
RPS10	ENSG00000124614.16	protein_coding	2637.99	-0.446113	0.174114	0.0749287
DPF2	ENSG00000133884.10	protein_coding	179.307	-0.481182	0.187921	0.0749287
MGAT4B	ENSG00000161013.17	protein_coding	576.601	0.515148	0.201372	0.0753126
ANXA3	ENSG00000138772.13	protein_coding	390.785	0.676918	0.264884	0.0755119
HDAC6	ENSG00000094631.21	protein_coding	109.002	0.595146	0.232836	0.0755119
GMFG	ENSG00000130755.13	protein_coding	1148.84	-0.307382	0.120272	0.0755119
LYZ	ENSG00000090382.7	protein_coding	1165.75	-0.515665	0.201956	0.0758577
SPCS1	ENSG00000114902.14	protein_coding	400.948	-0.372856	0.146152	0.0761849
UQCRB	ENSG00000156467.9	protein_coding	1892.57	-0.452159	0.177269	0.0761849
SETX	ENSG00000107290.14	protein_coding	577.769	0.400018	0.157153	0.0769637
SSU72	ENSG00000160075.12	protein_coding	459.822	-0.308964	0.121355	0.0769637
AIF1	ENSG00000204472.13	protein_coding	2611.68	-0.451928	0.177474	0.0769637
ADH5	ENSG00000197894.11	protein_coding	135.826	-0.472472	0.185676	0.0770145
ATP5ME	ENSG00000169020.10	protein_coding	586.336	-0.369746	0.145849	0.0789998
RSL24D1	ENSG00000137876.10	protein_coding	347.058	-0.507314	0.200797	0.080831
SMDT1	ENSG00000183172.9	protein_coding	281.921	-0.380002	0.150533	0.0811907
PKIG	ENSG00000168734.14	protein_coding	411.706	-0.31192	0.123757	0.0819501
RPS18	ENSG00000231500.7	protein_coding	7076.26	-0.463862	0.184076	0.0819501
PSMB6	ENSG00000142507.10	protein_coding	367.688	-0.487984	0.19374	0.0820933
S100A10	ENSG00000197747.9	protein_coding	1169.2	-0.439787	0.174647	0.0821007
NREP	ENSG00000134986.14	protein_coding	229.62	0.468741	0.186832	0.0837378
KLF3	ENSG00000109787.13	protein_coding	532.906	0.279953	0.111556	0.0837378
RPL19	ENSG00000108298.11	protein_coding	10604.2	-0.414678	0.165213	0.0837378
SEC13	ENSG00000157020.18	protein_coding	139.363	-0.498239	0.198587	0.0837378
PHF14	ENSG00000106443.16	protein_coding	483.678	0.437195	0.174463	0.0841654
SS18	ENSG00000141380.14	protein_coding	273.202	0.367067	0.146497	0.0841654
ACTR3	ENSG00000115091.12	protein_coding	3092.15	-0.210675	0.0840891	0.0841654
RPS3A	ENSG00000145425.10	protein_coding	3417.12	-0.435864	0.174168	0.0847028
SCP2	ENSG00000116171.18	protein_coding	729.497	-0.322159	0.128904	0.0852309
RPS11	ENSG00000142534.7	protein_coding	3529.56	-0.39511	0.158083	0.0852309
DNAJC1	ENSG00000136770.11	protein_coding	121.799	0.512179	0.20513	0.0856643
FMR1	ENSG00000102081.14	protein_coding	425.542	0.45085	0.180715	0.0858794
NFYC	ENSG00000066136.20	protein_coding	204.068	-0.339703	0.136163	0.0858794
PPP4R3B	ENSG00000275052.5	protein_coding	533.258	0.280002	0.112497	0.0870338
CHMP4B	ENSG00000101421.4	protein_coding	1690.26	-0.197818	0.0794966	0.0870338
UPF3A	ENSG00000169062.15	protein_coding	666.883	-0.278891	0.112069	0.0870338
VBP1	ENSG00000155959.12	protein_coding	93.705	-0.52094	0.209654	0.0877834
EIF5A	ENSG00000132507.18	protein_coding	470.591	-0.356855	0.14367	0.0878669
MAP3K5	ENSG00000197442.10	protein_coding	874.606	0.336694	0.13568	0.0882243
MED4	ENSG00000136146.15	protein_coding	461.261	-0.300035	0.120919	0.0882243
BARD1	ENSG00000138376.11	protein_coding	388.424	0.389129	0.156975	0.0885419
FYN	ENSG00000010810.17	protein_coding	624.63	0.286169	0.115443	0.0885419
ENDOD1	ENSG00000149218.5	protein_coding	1245.21	0.539808	0.217991	0.088907
ITPR2	ENSG00000123104.12	protein_coding	548.611	0.527356	0.212936	0.088907
FOXP1	ENSG00000114861.21	protein_coding	671.208	0.379812	0.153507	0.0892828
LRRC8B	ENSG00000197147.13	protein_coding	439.006	0.521673	0.210967	0.0895076
JAK2	ENSG00000096968.13	protein_coding	739.879	0.330749	0.133802	0.0895747
EIF3G	ENSG00000130811.12	protein_coding	495.723	-0.468906	0.190003	0.0904532
CD2AP	ENSG00000198087.7	protein_coding	610.013	0.245561	0.0995573	0.0905138
CBX1	ENSG00000108468.15	protein_coding	501.379	-0.459652	0.186355	0.0905138
SAT1	ENSG00000130066.16	protein_coding	13040.7	-0.355085	0.144088	0.0909244
EIF2B1	ENSG00000111361.13	protein_coding	148.052	-0.627543	0.254867	0.0913203
BAG1	ENSG00000107262.24	protein_coding	444.673	-0.411653	0.167405	0.0920008
GTF2IRD2B	ENSG00000174428.18	protein_coding	178.795	0.502581	0.204459	0.0920554
NR1H2	ENSG00000131408.15	protein_coding	298.598	-0.40207	0.163596	0.0920554
UBXN7	ENSG00000163960.12	protein_coding	11542.7	-0.286132	0.116517	0.0924253
OGDH	ENSG00000105953.15	protein_coding	202.666	0.445174	0.181383	0.0926368
SPECC1	ENSG00000128487.16	protein_coding	716.003	0.297839	0.121416	0.0926824
UFC1	ENSG00000143222.12	protein_coding	170.916	-0.497287	0.202684	0.0926824
PQBP1	ENSG00000102103.16	protein_coding	172.352	-0.54607	0.22284	0.0931963
CBWD3	ENSG00000196873.15	protein_coding	215.26	-0.562122	0.229576	0.093567
ZMYND11	ENSG00000015171.19	protein_coding	304.914	0.367318	0.150193	0.0939414
FCER1G	ENSG00000158869.11	protein_coding	3062.81	-0.411529	0.168257	0.0939414
RWDD1	ENSG00000111832.13	protein_coding	420.97	-0.418796	0.171256	0.0939414
CCDC13	ENSG00000244607.7	protein_coding	91.9025	0.770665	0.316008	0.0955509
POLR2I	ENSG00000105258.9	protein_coding	189.714	-0.538588	0.221065	0.0960475
CREBBP	ENSG00000005339.15	protein_coding	478.499	0.575866	0.236631	0.0966288
CCDC91	ENSG00000123106.10	protein_coding	755.298	0.314179	0.12919	0.096934
DOCK8	ENSG00000107099.15	protein_coding	494.289	0.524695	0.215899	0.0972242
WWP2	ENSG00000198373.12	protein_coding	170.478	0.579223	0.238713	0.097814
CAPZB	ENSG00000077549.18	protein_coding	1914.05	-0.196995	0.0811747	0.097814
ZRANB2	ENSG00000132485.14	protein_coding	260.117	-0.413088	0.170222	0.097814
CXorf56	ENSG00000018610.14	protein_coding	91.837	-0.611465	0.252103	0.0979337
BLOC1S5	ENSG00000188428.20	protein_coding	224.342	-0.480138	0.198444	0.0993989
TPT1	ENSG00000133112.16	protein_coding	11150.7	-0.276588	0.114366	0.0995433
H4C9	ENSG00000276180.1	protein_coding	160.868	-0.608631	0.251925	0.100085
DCAF11	ENSG00000100897.17	protein_coding	210.119	0.443624	0.183786	0.100519
PDCL3	ENSG00000115539.14	protein_coding	220.294	-0.493285	0.204525	0.100907
DGUOK	ENSG00000114956.20	protein_coding	156.467	-0.459999	0.190778	0.100944
NDUFA10	ENSG00000130414.12	protein_coding	414.624	-0.282521	0.117203	0.100977
FAM104A	ENSG00000133193.12	protein_coding	346.38	-0.429615	0.17843	0.101592
UBE2D3	ENSG00000109332.20	protein_coding	1119.7	-0.198636	0.0825489	0.101852
TNFSF13B	ENSG00000102524.11	protein_coding	235.925	0.463799	0.192907	0.102267
DONSON	ENSG00000159147.18	protein_coding	285.351	0.682871	0.284488	0.102996
RPL13	ENSG00000167526.13	protein_coding	5727.36	-0.414073	0.172459	0.102996
TMEM256	ENSG00000205544.4	protein_coding	187.363	-0.536882	0.223697	0.102996
ATP6V1E1	ENSG00000131100.13	protein_coding	1142.31	-0.335057	0.139712	0.103361
TLK1	ENSG00000198586.14	protein_coding	4949.29	0.355452	0.148451	0.104284
PABPC4	ENSG00000090621.14	protein_coding	255.352	0.57874	0.241771	0.104317
FARSA	ENSG00000179115.11	protein_coding	158.369	0.424631	0.177609	0.105
RHOBTB1	ENSG00000072422.17	protein_coding	592.05	0.540821	0.226514	0.105776
CEP57	ENSG00000166037.11	protein_coding	170.384	0.405306	0.169823	0.105782
EMC4	ENSG00000128463.13	protein_coding	129.894	-0.480039	0.201149	0.105782
SF3B5	ENSG00000169976.7	protein_coding	85.9778	-0.590731	0.24777	0.106289
STX11	ENSG00000135604.10	protein_coding	472.058	0.294085	0.123376	0.10629
PAIP2	ENSG00000120727.13	protein_coding	9380.35	-0.326323	0.137002	0.106646
VAMP8	ENSG00000118640.11	protein_coding	415.329	-0.296036	0.124714	0.108872
SYNE1	ENSG00000131018.24	protein_coding	446.033	0.522912	0.220343	0.10888
EIF4H	ENSG00000106682.14	protein_coding	531.935	-0.402022	0.169643	0.109714
CWC22	ENSG00000163510.14	protein_coding	248.168	-0.405984	0.171387	0.109852
CDC42BPB	ENSG00000198752.11	protein_coding	534.022	0.274828	0.116124	0.110169
TMEM230	ENSG00000089063.15	protein_coding	415.567	-0.301957	0.127581	0.110169
USP22	ENSG00000124422.12	protein_coding	501.82	0.363619	0.153744	0.110485
PSMD2	ENSG00000175166.17	protein_coding	293.312	0.364842	0.154561	0.1117
ARL8B	ENSG00000134108.13	protein_coding	1106.27	-0.372398	0.157831	0.111851
PSMA2	ENSG00000106588.11	protein_coding	244.582	-0.31923	0.135354	0.111992
ACBD3	ENSG00000182827.9	protein_coding	481.689	-0.320488	0.136065	0.112758
MAP2K4	ENSG00000065559.15	protein_coding	226.265	0.427949	0.181939	0.113588
PCSK5	ENSG00000099139.14	protein_coding	5522.32	0.710841	0.303186	0.115569
SMARCA4	ENSG00000127616.18	protein_coding	339.415	0.542208	0.231276	0.115569
DDX17	ENSG00000100201.21	protein_coding	622.936	0.259233	0.110588	0.115569
NORAD	ENSG00000260032.2	lncRNA	5096.23	0.392275	0.167396	0.115629
AF117829.1	ENSG00000251136.9	lncRNA	388.862	0.609594	0.260252	0.1158
HERC1	ENSG00000103657.14	protein_coding	713.377	0.408991	0.174735	0.116158
GNAZ	ENSG00000128266.9	protein_coding	1189.34	0.483525	0.206692	0.116395
LIMD2	ENSG00000136490.9	protein_coding	569.927	-0.478736	0.204741	0.116574
UBE2I	ENSG00000103275.20	protein_coding	406.7	-0.438298	0.187796	0.117769
TNIP2	ENSG00000168884.15	protein_coding	398.16	-0.420981	0.180478	0.11802
STK17A	ENSG00000164543.7	protein_coding	322.515	-0.382439	0.164128	0.118629
COPB1	ENSG00000129083.12	protein_coding	177.805	-0.462295	0.198491	0.118807
EHD1	ENSG00000110047.18	protein_coding	895.698	0.381123	0.163716	0.118935
KRI1	ENSG00000129347.21	protein_coding	192.521	-0.485071	0.208401	0.118935
TBCB	ENSG00000105254.12	protein_coding	197.315	-0.394572	0.169634	0.119264
TATDN3	ENSG00000203705.11	protein_coding	131.411	-0.479797	0.206398	0.119544
MPC1	ENSG00000060762.19	protein_coding	173.431	-0.368327	0.158769	0.120719
ARL6IP4	ENSG00000182196.13	protein_coding	1182.28	-0.390245	0.168182	0.120719
RAB5B	ENSG00000111540.16	protein_coding	281.774	0.455168	0.196258	0.120767
FTX	ENSG00000230590.11	lncRNA	288.995	0.550094	0.237439	0.121217
TUBA1C	ENSG00000167553.15	protein_coding	636.825	0.432022	0.18653	0.121269
ALOX12	ENSG00000108839.12	protein_coding	877.084	0.475165	0.205325	0.121544
ZMYM2	ENSG00000121741.16	protein_coding	382.88	0.318766	0.137727	0.121544
SNRNP27	ENSG00000124380.11	protein_coding	343.006	-0.364048	0.157372	0.121669
EDF1	ENSG00000107223.13	protein_coding	763.606	-0.363512	0.157237	0.121964
SNRK	ENSG00000163788.14	protein_coding	305.276	0.330381	0.142993	0.122249
GNLY	ENSG00000115523.16	protein_coding	238.066	-0.540473	0.234022	0.122398
AC009035.1	ENSG00000260580.1	lncRNA	438.666	0.612282	0.265233	0.122565
TMCC1	ENSG00000172765.17	protein_coding	150.548	-0.530581	0.229932	0.122693
DMTN	ENSG00000158856.18	protein_coding	1053.45	0.362874	0.157549	0.123929
SEC14L1	ENSG00000129657.16	protein_coding	1003.37	0.330094	0.14335	0.123936
SSR2	ENSG00000163479.14	protein_coding	312.241	-0.410395	0.178337	0.124254
TAF7	ENSG00000178913.8	protein_coding	259.936	-0.326987	0.142176	0.124531
ATP5MC2	ENSG00000135390.20	protein_coding	417.776	-0.341513	0.148658	0.125206
RPS9	ENSG00000170889.14	protein_coding	1609.39	-0.418532	0.182288	0.125469
PDZK1IP1	ENSG00000162366.8	protein_coding	2673.1	-0.63607	0.277554	0.126728
MCTP1	ENSG00000175471.19	protein_coding	1349.89	0.283471	0.123799	0.127067
CLIC1	ENSG00000213719.8	protein_coding	2073.87	-0.235738	0.102958	0.127067
TRIM58	ENSG00000162722.9	protein_coding	5062.48	0.315641	0.138121	0.127949
RPS3	ENSG00000149273.15	protein_coding	3527.24	-0.386732	0.16924	0.127949
DHPS	ENSG00000095059.16	protein_coding	133.609	-0.465118	0.20358	0.127949
GADD45GIP1	ENSG00000179271.3	protein_coding	278.745	-0.473365	0.207211	0.127949
GTF2H2	ENSG00000145736.14	protein_coding	111.893	-0.632227	0.276672	0.127949
SCYL2	ENSG00000136021.19	protein_coding	592.841	0.371839	0.162862	0.128214
TMEM14B	ENSG00000137210.14	protein_coding	116.051	-0.459139	0.201186	0.128381
CACYBP	ENSG00000116161.18	protein_coding	495.719	-0.428994	0.18812	0.128793
RHOG	ENSG00000177105.10	protein_coding	435.431	-0.28569	0.12542	0.129488
CCNG1	ENSG00000113328.19	protein_coding	384.074	0.299	0.131337	0.129749
UNC45A	ENSG00000140553.18	protein_coding	191.315	0.443489	0.19488	0.129874
CDC37	ENSG00000105401.9	protein_coding	1103.7	0.184177	0.080991	0.129997
RPLP2	ENSG00000177600.9	protein_coding	9508.62	-0.399151	0.175542	0.129997
MRPS34	ENSG00000074071.14	protein_coding	277.209	-0.434427	0.191002	0.129997
C1orf198	ENSG00000119280.17	protein_coding	625.554	0.467102	0.205564	0.130173
SNAPC5	ENSG00000174446.13	protein_coding	159.866	-0.506944	0.223066	0.130173
CLDND1	ENSG00000080822.17	protein_coding	122.255	-0.401598	0.176895	0.130696
RNF113A	ENSG00000125352.6	protein_coding	114.577	-0.47072	0.207455	0.130945
H4C5	ENSG00000276966.2	protein_coding	637.834	-0.430988	0.19006	0.131247
HEBP2	ENSG00000051620.11	protein_coding	347.342	-0.523071	0.230723	0.13126
AC013652.1	ENSG00000259345.7	lncRNA	71.9818	0.630981	0.278771	0.13193
ZNF430	ENSG00000118620.13	protein_coding	298.013	-0.333119	0.147156	0.13193
JTB	ENSG00000143543.15	protein_coding	221.921	-0.364317	0.160979	0.13193
ZNF22	ENSG00000165512.5	protein_coding	151.592	-0.394523	0.174308	0.13193
COX6B1	ENSG00000126267.11	protein_coding	708.923	-0.220098	0.0972849	0.132007
PRKD3	ENSG00000115825.10	protein_coding	289.068	0.46309	0.204906	0.132502
SNAP29	ENSG00000099940.12	protein_coding	776.655	0.284529	0.125899	0.132502
RAC2	ENSG00000128340.15	protein_coding	710.932	-0.37857	0.167579	0.132645
IRF9	ENSG00000213928.9	protein_coding	196.021	0.453082	0.200699	0.132907
ITSN2	ENSG00000198399.14	protein_coding	640.252	0.188103	0.0833311	0.132907
ESD	ENSG00000139684.15	protein_coding	112.322	-0.591955	0.262636	0.133915
HEXIM1	ENSG00000186834.3	protein_coding	197.403	0.278698	0.123922	0.135032
KIF5B	ENSG00000170759.11	protein_coding	890.434	0.23187	0.103113	0.135032
DYNC1I2	ENSG00000077380.15	protein_coding	860.501	-0.226774	0.100813	0.135032
ZNF622	ENSG00000173545.5	protein_coding	216.142	-0.492729	0.219077	0.135032
CARD8	ENSG00000105483.18	protein_coding	439.802	-0.289792	0.128982	0.13537
PSME2	ENSG00000100911.16	protein_coding	689.255	-0.411666	0.183227	0.13537
F2R	ENSG00000181104.7	protein_coding	1013.52	0.429782	0.191402	0.135655
HAX1	ENSG00000143575.15	protein_coding	161.64	-0.409502	0.182733	0.137054
RBM23	ENSG00000100461.18	protein_coding	1542.52	-0.225029	0.100456	0.137203
ATP6V0C	ENSG00000185883.12	protein_coding	1069.84	-0.251254	0.112331	0.138038
NME7	ENSG00000143156.14	protein_coding	111.296	-0.446875	0.199749	0.138038
LARP1	ENSG00000155506.17	protein_coding	349.263	0.389806	0.174385	0.138368
ATP5F1A	ENSG00000152234.16	protein_coding	535.647	-0.463021	0.20719	0.138388
ACTN1	ENSG00000072110.13	protein_coding	4025.05	0.387903	0.173683	0.138703
RAB2B	ENSG00000129472.15	protein_coding	205.006	-0.376912	0.168814	0.138772
SYTL4	ENSG00000102362.15	protein_coding	488.399	0.519546	0.232991	0.139088
XPO6	ENSG00000169180.11	protein_coding	202.614	0.50514	0.226534	0.139088
CAPZA1	ENSG00000116489.13	protein_coding	1102.97	-0.20081	0.0900554	0.139088
LSM3	ENSG00000170860.4	protein_coding	323.392	-0.360166	0.16148	0.139088
ZNF280D	ENSG00000137871.20	protein_coding	96.9025	0.498073	0.223514	0.139415
LAMTOR2	ENSG00000116586.12	protein_coding	243.276	-0.377856	0.169597	0.139415
PSMA4	ENSG00000041357.16	protein_coding	338.833	-0.405896	0.182258	0.139457
MTCH2	ENSG00000109919.10	protein_coding	117.953	-0.448	0.201179	0.139457
KAT6A	ENSG00000083168.11	protein_coding	1110.21	0.236427	0.106212	0.139592
TBCEL	ENSG00000154114.12	protein_coding	264.344	-0.334707	0.150434	0.139801
SEC61G	ENSG00000132432.14	protein_coding	436.736	-0.331777	0.149176	0.13994
UBE2O	ENSG00000175931.13	protein_coding	317.051	0.419792	0.188911	0.140447
CCDC25	ENSG00000147419.18	protein_coding	236.893	-0.374631	0.168957	0.142028
ORMDL3	ENSG00000172057.10	protein_coding	235.843	0.389318	0.175797	0.142846
PYCARD	ENSG00000103490.14	protein_coding	472.424	-0.445254	0.201263	0.143332
RESF1	ENSG00000174718.12	protein_coding	524.689	-0.512736	0.231734	0.143332
HMGN2	ENSG00000198830.11	protein_coding	790.12	-0.257687	0.116516	0.143338
NECAP2	ENSG00000157191.20	protein_coding	279.055	-0.372433	0.168422	0.143338
TSG101	ENSG00000074319.13	protein_coding	140.533	0.495088	0.224313	0.14434
HIGD1A	ENSG00000181061.13	protein_coding	1467.61	-0.311428	0.141077	0.14434
CHORDC1	ENSG00000110172.12	protein_coding	139.974	-0.547897	0.248154	0.14434
SH3GLB1	ENSG00000097033.14	protein_coding	758.801	0.287842	0.130471	0.144512
TES	ENSG00000135269.18	protein_coding	471.219	-0.475044	0.215484	0.144937
H4C6	ENSG00000274618.1	protein_coding	309.649	-0.558058	0.253927	0.147307
HSPA1A	ENSG00000204389.10	protein_coding	323.221	0.440558	0.200525	0.147384
CTDSP1	ENSG00000144579.7	protein_coding	213.339	0.374667	0.17061	0.147571
EIF2S2	ENSG00000125977.7	protein_coding	650.119	-0.278577	0.127016	0.148445
PSMB8-AS1	ENSG00000204261.9	lncRNA	241.607	-0.335238	0.153051	0.14935
UBTF	ENSG00000108312.15	protein_coding	380.413	0.43565	0.199071	0.149358
ELMO1	ENSG00000155849.15	protein_coding	456.053	0.330382	0.150946	0.149358
PAK1IP1	ENSG00000111845.5	protein_coding	148.92	-0.291541	0.133184	0.149358
MALAT1	ENSG00000251562.8	lncRNA	7017.55	-0.326527	0.149202	0.149358
CEP135	ENSG00000174799.11	protein_coding	220.894	0.274258	0.125375	0.149523
CDK14	ENSG00000058091.17	protein_coding	309.741	-0.378918	0.173938	0.152615
CLTA	ENSG00000122705.17	protein_coding	634.105	-0.186063	0.0855519	0.153523
ETFB	ENSG00000105379.9	protein_coding	186.213	-0.413527	0.190098	0.153523
JADE2	ENSG00000043143.20	protein_coding	196.069	-0.518016	0.238203	0.153523
MRFAP1L1	ENSG00000178988.11	protein_coding	367.54	-0.433624	0.199601	0.154205
VTI1B	ENSG00000100568.11	protein_coding	949.996	-0.223235	0.102809	0.154442
NCOR2	ENSG00000196498.13	protein_coding	426.424	0.421438	0.194187	0.154682
ATP6V1D	ENSG00000100554.12	protein_coding	339.366	-0.346278	0.159636	0.154923
RPS24	ENSG00000138326.21	protein_coding	2589.61	-0.372724	0.172011	0.155266
ZCRB1	ENSG00000139168.8	protein_coding	267.166	-0.399937	0.184558	0.155266
BRIX1	ENSG00000113460.13	protein_coding	91.0813	-0.403259	0.186046	0.155266
LACTB2	ENSG00000147592.9	protein_coding	189.967	-0.315618	0.145729	0.155311
THYN1	ENSG00000151500.15	protein_coding	127.109	-0.481997	0.222523	0.155311
IGF2	ENSG00000167244.21	protein_coding	1070.49	0.51612	0.238494	0.155611
PBDC1	ENSG00000102390.11	protein_coding	167.662	-0.456248	0.210814	0.155611
DCK	ENSG00000156136.10	protein_coding	721.452	-0.227348	0.105258	0.157033
POMT1	ENSG00000130714.16	protein_coding	224.324	-0.311827	0.144397	0.157033
PRPF19	ENSG00000110107.9	protein_coding	122.288	0.471284	0.218293	0.157067
RPF1	ENSG00000117133.11	protein_coding	208.733	-0.504695	0.234093	0.158065
PSMA6	ENSG00000100902.11	protein_coding	498.96	-0.20375	0.0945384	0.158175
KLHL6	ENSG00000172578.12	protein_coding	438.407	0.284411	0.132077	0.158526
CS	ENSG00000062485.19	protein_coding	151.16	-0.469236	0.217905	0.158526
SSRP1	ENSG00000149136.9	protein_coding	230.757	0.488767	0.22708	0.158728
ANKRD28	ENSG00000206560.11	protein_coding	2388.05	0.337257	0.15676	0.158927
LSMEM1	ENSG00000181016.9	protein_coding	229.412	0.730383	0.339895	0.159579
H19	ENSG00000130600.19	lncRNA	1084	0.483717	0.225093	0.159579
NDUFA12	ENSG00000184752.13	protein_coding	292.559	-0.44769	0.208636	0.160613
PRKAA1	ENSG00000132356.11	protein_coding	612.485	0.309429	0.144292	0.160769
XPC	ENSG00000154767.14	protein_coding	275.492	-0.594789	0.277356	0.160769
EPB41L3	ENSG00000082397.17	protein_coding	429.126	0.399751	0.186529	0.161126
NDUFS5	ENSG00000168653.11	protein_coding	1109.2	-0.242059	0.112991	0.161267
RPL3	ENSG00000100316.16	protein_coding	6745.79	-0.370383	0.173022	0.161541
SECISBP2L	ENSG00000138593.9	protein_coding	308.684	0.391335	0.182864	0.161609
WASHC2A	ENSG00000099290.17	protein_coding	231.355	-0.346733	0.162086	0.16176
NSD3	ENSG00000147548.17	protein_coding	526.72	-0.256909	0.120283	0.162538
UTP11	ENSG00000183520.12	protein_coding	134.57	-0.434422	0.203386	0.162538
PFDN1	ENSG00000113068.10	protein_coding	197.878	-0.466987	0.218582	0.162538
TRIOBP	ENSG00000100106.22	protein_coding	263.835	0.451917	0.211796	0.163021
OARD1	ENSG00000124596.17	protein_coding	144.891	-0.505994	0.237132	0.163021
PPIB	ENSG00000166794.4	protein_coding	265.982	-0.368397	0.172794	0.163539
MRPL30	ENSG00000185414.20	protein_coding	170.558	-0.373535	0.175261	0.163632
EHD3	ENSG00000013016.16	protein_coding	843.91	0.40844	0.191864	0.164086
PSMD6	ENSG00000163636.10	protein_coding	486.905	-0.210588	0.0988918	0.164086
RAN	ENSG00000132341.12	protein_coding	377.29	-0.366281	0.17205	0.164086
KDM1B	ENSG00000165097.16	protein_coding	229.889	0.327193	0.153839	0.164693
ZC3H6	ENSG00000188177.14	protein_coding	3642.38	-0.252506	0.118869	0.165576
ITGA6	ENSG00000091409.15	protein_coding	238.474	0.458241	0.215824	0.16561
TXNL1	ENSG00000091164.13	protein_coding	363.59	-0.308179	0.145115	0.16561
SNF8	ENSG00000159210.10	protein_coding	308.069	-0.420277	0.198022	0.165766
CDIP1	ENSG00000089486.17	protein_coding	272.635	0.464115	0.218806	0.166091
ZMYM4	ENSG00000146463.12	protein_coding	590.56	0.443194	0.209147	0.166755
MEA1	ENSG00000124733.5	protein_coding	664.724	-0.23794	0.112357	0.167121
SAP18	ENSG00000150459.12	protein_coding	499.612	-0.279175	0.132034	0.168297
TLN1	ENSG00000137076.21	protein_coding	16306.6	0.431784	0.204261	0.168323
PNISR	ENSG00000132424.16	protein_coding	237.618	-0.405578	0.19206	0.169033
C11orf98	ENSG00000278615.4	protein_coding	251.633	-0.382892	0.18151	0.169589
COPS6	ENSG00000168090.10	protein_coding	466.338	-0.32539	0.154311	0.169732
NOSIP	ENSG00000142546.14	protein_coding	218.385	-0.45295	0.214914	0.169993
BPGM	ENSG00000172331.12	protein_coding	336.731	-0.498397	0.236681	0.170564
DARS1	ENSG00000115866.11	protein_coding	371.999	-0.365592	0.173706	0.170838
PHAX	ENSG00000164902.14	protein_coding	186.113	-0.494103	0.234964	0.171393
LASP1	ENSG00000002834.18	protein_coding	685.754	0.184815	0.0879292	0.171633
PPIG	ENSG00000138398.16	protein_coding	422.576	-0.296103	0.140921	0.171717
OLMALINC	ENSG00000235823.3	lncRNA	1027.79	0.634722	0.302322	0.172247
MOB3A	ENSG00000172081.14	protein_coding	311.762	0.421146	0.200862	0.173239
PCED1B-AS1	ENSG00000247774.7	lncRNA	100.946	-0.554695	0.264722	0.173603
CDK16	ENSG00000102225.16	protein_coding	101.008	0.430016	0.205293	0.173633
RPS21	ENSG00000171858.18	protein_coding	1398.55	-0.376572	0.179799	0.173633
SRBD1	ENSG00000068784.13	protein_coding	153.7	0.483048	0.230777	0.173979
PIK3AP1	ENSG00000155629.15	protein_coding	423.999	0.422273	0.201908	0.174322
H2BC4	ENSG00000180596.7	protein_coding	6063.97	-0.23605	0.112856	0.174322
EXOC4	ENSG00000131558.15	protein_coding	148.539	0.408342	0.195367	0.17468
SF3A1	ENSG00000099995.19	protein_coding	588.462	0.331244	0.158558	0.174924
KHSRP	ENSG00000088247.17	protein_coding	216.227	0.413548	0.198226	0.175757
GTF3C6	ENSG00000155115.7	protein_coding	566.603	-0.265201	0.127171	0.175851
BANP	ENSG00000172530.20	protein_coding	315.214	-0.349455	0.167595	0.175851
PNRC1	ENSG00000146278.11	protein_coding	1292.56	-0.35567	0.17083	0.176998
HPCAL1	ENSG00000115756.13	protein_coding	183.211	0.329426	0.158295	0.1772
LEPR	ENSG00000116678.19	protein_coding	402.861	0.427716	0.205631	0.177468
EHBP1L1	ENSG00000173442.13	protein_coding	691.605	0.466178	0.224246	0.177573
KDM4C	ENSG00000107077.18	protein_coding	172.757	0.429531	0.206598	0.177573
ERH	ENSG00000100632.11	protein_coding	305.794	-0.417193	0.200769	0.177638
PSMC3	ENSG00000165916.8	protein_coding	219.801	-0.463789	0.22321	0.177638
NDUFV2	ENSG00000178127.13	protein_coding	239.387	-0.46348	0.223243	0.178175
IFI27L2	ENSG00000119632.4	protein_coding	230.831	-0.313032	0.151182	0.180212
SPART	ENSG00000133104.14	protein_coding	314.598	-0.35396	0.170938	0.180212
KHDRBS1	ENSG00000121774.18	protein_coding	488.646	-0.293107	0.141679	0.180785
NOP14	ENSG00000087269.16	protein_coding	339.606	-0.3028	0.14663	0.182236
NDUFB2	ENSG00000090266.13	protein_coding	386.692	-0.411194	0.199187	0.182348
MRPS22	ENSG00000175110.11	protein_coding	199.215	-0.455666	0.220801	0.182447
GSN	ENSG00000148180.19	protein_coding	627.387	0.262361	0.127163	0.182471
FKBP2	ENSG00000173486.13	protein_coding	138.825	-0.526363	0.255224	0.182638
KCMF1	ENSG00000176407.18	protein_coding	258.189	0.406651	0.197306	0.183033
TRIM28	ENSG00000130726.12	protein_coding	119.449	0.511969	0.248708	0.183761
PRDX3	ENSG00000165672.7	protein_coding	174.226	-0.428893	0.208354	0.183761
CDYL2	ENSG00000166446.15	protein_coding	194.991	0.440867	0.214246	0.183884
MRPS6	ENSG00000243927.6	protein_coding	362.618	-0.31034	0.150857	0.183942
WASF3	ENSG00000132970.14	protein_coding	399.346	0.451998	0.220131	0.185269
WARS1	ENSG00000140105.18	protein_coding	669.681	0.384815	0.187398	0.185269
FRMD4B	ENSG00000114541.15	protein_coding	1053.01	0.39226	0.191089	0.185321
PLPBP	ENSG00000147471.12	protein_coding	306.924	-0.23426	0.114317	0.186712
DAZAP2	ENSG00000183283.16	protein_coding	2123.82	-0.266841	0.130261	0.186828
SUMO1	ENSG00000116030.16	protein_coding	487.05	-0.294	0.143722	0.187934
SPTAN1	ENSG00000197694.17	protein_coding	531.383	0.476673	0.23348	0.189282
SELP	ENSG00000174175.17	protein_coding	981.173	0.430715	0.210989	0.189282
ARHGDIB	ENSG00000111348.9	protein_coding	9134.04	-0.21332	0.104501	0.189282
CLEC2B	ENSG00000110852.4	protein_coding	260.668	-0.457093	0.223973	0.189293
GABARAP	ENSG00000170296.10	protein_coding	1069.09	-0.202824	0.0994259	0.189497
IL32	ENSG00000008517.16	protein_coding	238.473	-0.482711	0.236699	0.189569
CCT3	ENSG00000163468.15	protein_coding	506.595	-0.267266	0.13119	0.190125
POLR2L	ENSG00000177700.6	protein_coding	116.096	-0.421864	0.207041	0.190125
NEK7	ENSG00000151414.15	protein_coding	766.318	0.266645	0.130962	0.190259
LTV1	ENSG00000135521.9	protein_coding	152.717	-0.420932	0.206714	0.190259
KIAA1328	ENSG00000150477.15	protein_coding	570.872	0.484839	0.238439	0.191278
C9orf78	ENSG00000136819.15	protein_coding	1040.33	-0.357796	0.176076	0.191686
RPL22L1	ENSG00000163584.18	protein_coding	328.957	-0.44951	0.221312	0.191916
ACVR1	ENSG00000115170.15	protein_coding	329.595	0.446787	0.220255	0.192717
VCP	ENSG00000165280.16	protein_coding	567.332	-0.263952	0.130102	0.192717
ZFR	ENSG00000056097.16	protein_coding	453.619	0.260751	0.128574	0.192731
PLAC8	ENSG00000145287.10	protein_coding	915.061	-0.370667	0.182841	0.192874
KDM5B	ENSG00000117139.18	protein_coding	135.329	0.419757	0.207265	0.193412
SMARCB1	ENSG00000099956.19	protein_coding	280.408	-0.325041	0.160495	0.193412
OCIAD2	ENSG00000145247.12	protein_coding	136.101	-0.496487	0.245556	0.194757
FOXN2	ENSG00000170802.16	protein_coding	352.895	-0.305424	0.151285	0.195753
NAPG	ENSG00000134265.13	protein_coding	177.243	0.370407	0.183533	0.195791
PNKD	ENSG00000127838.14	protein_coding	297.384	-0.328255	0.162671	0.195791
SNHG14	ENSG00000224078.15	lncRNA	302.856	0.394781	0.195693	0.195848
RAD50	ENSG00000113522.14	protein_coding	246.58	0.319195	0.158347	0.196164
NEK4	ENSG00000114904.13	protein_coding	287.614	0.292905	0.145278	0.196164
NAB1	ENSG00000138386.17	protein_coding	170.994	0.37977	0.188541	0.196495
ANXA6	ENSG00000197043.14	protein_coding	570.52	-0.386472	0.191873	0.196495
BRAF	ENSG00000157764.13	protein_coding	284.715	0.325747	0.161766	0.19653
RIC8B	ENSG00000111785.20	protein_coding	199.164	-0.336287	0.167089	0.196829
SMAD5	ENSG00000113658.18	protein_coding	212.767	0.513382	0.255249	0.197107
NDUFS4	ENSG00000164258.12	protein_coding	286.398	-0.269069	0.133804	0.197107
CCDC59	ENSG00000133773.12	protein_coding	130.769	-0.52678	0.261987	0.197107
TWSG1	ENSG00000128791.12	protein_coding	255.08	0.440448	0.219145	0.197158
ALYREF	ENSG00000183684.8	protein_coding	124.592	-0.443977	0.220914	0.197158
PHTF2	ENSG00000006576.16	protein_coding	329.448	0.394426	0.196444	0.197845
RAB13	ENSG00000143545.10	protein_coding	1301.57	0.308245	0.153556	0.197852
ENAH	ENSG00000154380.17	protein_coding	179.997	0.518286	0.258393	0.197978
YPEL2	ENSG00000175155.10	protein_coding	1409.65	-0.273959	0.136532	0.197978
CHCHD7	ENSG00000170791.18	protein_coding	102.949	-0.491474	0.245025	0.197978
HDDC2	ENSG00000111906.18	protein_coding	163.826	-0.480654	0.239691	0.198009
HSP90AA1	ENSG00000080824.18	protein_coding	2914.19	-0.228755	0.114235	0.198927
RAB6A	ENSG00000175582.19	protein_coding	3598.8	-0.263659	0.131646	0.198927
SKIL	ENSG00000136603.14	protein_coding	166.22	0.413837	0.206753	0.198939
C1orf162	ENSG00000143110.11	protein_coding	352.965	-0.375989	0.187806	0.198939
ANO6	ENSG00000177119.16	protein_coding	5613.11	0.3906	0.195235	0.198972
ABRACL	ENSG00000146386.8	protein_coding	469.808	-0.308801	0.154333	0.198972
POLR2B	ENSG00000047315.16	protein_coding	150.715	0.426936	0.21349	0.199085
DR1	ENSG00000117505.13	protein_coding	422.92	0.284785	0.142424	0.199085
TOP1	ENSG00000198900.6	protein_coding	1606.56	0.167929	0.0841061	0.200063
PPIE	ENSG00000084072.17	protein_coding	279.029	-0.318361	0.15944	0.200063
SAP30BP	ENSG00000161526.15	protein_coding	251.713	-0.399028	0.199926	0.200216
TBCA	ENSG00000171530.14	protein_coding	902.325	-0.348051	0.17452	0.200538
CHMP2B	ENSG00000083937.9	protein_coding	173.849	-0.366527	0.183746	0.200538
AOPEP	ENSG00000148120.16	protein_coding	213.894	0.316656	0.158901	0.200867
CTNNBL1	ENSG00000132792.19	protein_coding	454.127	-0.297765	0.149392	0.200867
SNRPG	ENSG00000143977.14	protein_coding	234.33	-0.357497	0.179677	0.201941
LINS1	ENSG00000140471.17	protein_coding	594.879	-0.446423	0.224325	0.201941
BAG6	ENSG00000204463.12	protein_coding	191.686	0.362517	0.182274	0.202121
TSN	ENSG00000211460.12	protein_coding	129.344	0.40691	0.204733	0.202559
EFCAB14	ENSG00000159658.12	protein_coding	325.227	0.329726	0.165939	0.202587
SAMHD1	ENSG00000101347.9	protein_coding	996.559	0.402792	0.202959	0.20345
AMIGO2	ENSG00000139211.6	protein_coding	224.89	0.439573	0.221879	0.2048
ADAM9	ENSG00000168615.12	protein_coding	622.785	0.425158	0.21481	0.205311
VDAC1	ENSG00000213585.11	protein_coding	207.428	-0.322174	0.162758	0.205311
RREB1	ENSG00000124782.20	protein_coding	534.979	0.410325	0.207411	0.205543
PHC3	ENSG00000173889.16	protein_coding	2156.85	-0.243917	0.123421	0.206319
ZMAT2	ENSG00000146007.11	protein_coding	1416.59	-0.15069	0.0762784	0.206481
MRPL35	ENSG00000132313.15	protein_coding	130.47	-0.550912	0.278977	0.206647
XAF1	ENSG00000132530.17	protein_coding	294.246	0.431087	0.218514	0.207179
COPS9	ENSG00000172428.11	protein_coding	112.325	-0.460147	0.233236	0.207179
FTL	ENSG00000087086.15	protein_coding	33363.2	-0.145066	0.0735683	0.207436
SAV1	ENSG00000151748.15	protein_coding	493.887	0.372926	0.189184	0.207536
RSRC1	ENSG00000174891.13	protein_coding	996.348	-0.247886	0.125836	0.207789
SNRNP48	ENSG00000168566.13	protein_coding	164.827	-0.346542	0.175922	0.207789
LSM4	ENSG00000130520.10	protein_coding	199.539	-0.391267	0.198789	0.208367
GARS-DT	ENSG00000196295.12	lncRNA	298.952	0.436346	0.221813	0.208682
RNF11	ENSG00000123091.5	protein_coding	2671.54	0.288462	0.146683	0.208775
STAU1	ENSG00000124214.19	protein_coding	345.101	0.24826	0.126272	0.20881
RAB8A	ENSG00000167461.12	protein_coding	3271.04	0.238839	0.121773	0.210921
NDUFAF6	ENSG00000156170.13	protein_coding	67.3506	0.488614	0.24919	0.210967
CEBPD	ENSG00000221869.5	protein_coding	202.587	-0.39358	0.200764	0.210967
STRN	ENSG00000115808.12	protein_coding	388.78	0.316113	0.161296	0.211045
DLST	ENSG00000119689.15	protein_coding	207.457	-0.351313	0.179379	0.211494
ANAPC15	ENSG00000110200.8	protein_coding	217.399	-0.268744	0.1373	0.211852
RANBP17	ENSG00000204764.14	protein_coding	239.316	0.388804	0.198765	0.212051
AC092490.1	ENSG00000249790.3	lncRNA	257.715	-0.318775	0.162936	0.212051
PSMC5	ENSG00000087191.13	protein_coding	254.298	-0.279553	0.14299	0.212366
DNAJA2	ENSG00000069345.12	protein_coding	551.545	-0.205664	0.105225	0.212418
IGF2BP2	ENSG00000073792.15	protein_coding	506.04	0.374108	0.19152	0.212693
UQCRC1	ENSG00000010256.11	protein_coding	335.728	-0.398415	0.203989	0.212693
BRWD3	ENSG00000165288.11	protein_coding	808.578	0.344042	0.176197	0.212746
RPL10A	ENSG00000198755.11	protein_coding	883.462	-0.365386	0.187191	0.212859
HAUS6	ENSG00000147874.11	protein_coding	230.663	0.328558	0.168596	0.214224
EIF2AK2	ENSG00000055332.18	protein_coding	326.746	0.447382	0.229804	0.214794
DPP8	ENSG00000074603.19	protein_coding	240.441	0.3817	0.196065	0.214794
PDE5A	ENSG00000138735.16	protein_coding	4172.52	0.326818	0.168052	0.215508
CASP4	ENSG00000196954.14	protein_coding	594.351	-0.216947	0.111568	0.215508
LSM8	ENSG00000128534.8	protein_coding	241.701	-0.494804	0.254614	0.215892
FEZ2	ENSG00000171055.15	protein_coding	103.292	0.411213	0.211683	0.216064
PDCD5	ENSG00000105185.12	protein_coding	279.956	-0.371631	0.191596	0.217328
PIN4	ENSG00000102309.15	protein_coding	155.479	-0.404696	0.208774	0.217732
ANP32E	ENSG00000143401.15	protein_coding	794.551	-0.250528	0.129271	0.217742
NMNAT3	ENSG00000163864.17	protein_coding	515.489	0.475742	0.245593	0.217974
AC245060.5	ENSG00000274422.1	lncRNA	229.162	0.373616	0.192947	0.218146
NDUFB3	ENSG00000119013.9	protein_coding	131.09	-0.361273	0.186697	0.218587
NGDN	ENSG00000129460.16	protein_coding	136.663	-0.487793	0.252173	0.218738
FGL2	ENSG00000127951.7	protein_coding	261.465	-0.455263	0.23564	0.219706
HPRT1	ENSG00000165704.15	protein_coding	126.491	-0.293497	0.152008	0.22012
NTAN1	ENSG00000157045.9	protein_coding	347.192	-0.24415	0.126527	0.220468
DTD1	ENSG00000125821.12	protein_coding	179.545	-0.312252	0.161849	0.220468
TGFB1I1	ENSG00000140682.19	protein_coding	202.256	0.519652	0.269537	0.220668
UROD	ENSG00000126088.14	protein_coding	153.895	0.341912	0.177547	0.220668
PGD	ENSG00000142657.21	protein_coding	734.887	0.264868	0.13737	0.220668
MAGOHB	ENSG00000111196.10	protein_coding	419.206	-0.312697	0.162377	0.220668
LINC00467	ENSG00000153363.13	lncRNA	137.741	-0.369119	0.19155	0.220668
SPAG7	ENSG00000091640.8	protein_coding	382.537	-0.390613	0.202827	0.220668
CNIH1	ENSG00000100528.12	protein_coding	123.325	-0.412711	0.214332	0.220668
HBQ1	ENSG00000086506.3	protein_coding	138.526	-0.60608	0.314547	0.220668
GLCE	ENSG00000138604.10	protein_coding	795.763	0.362299	0.188379	0.221641
MRPL33	ENSG00000243147.8	protein_coding	279.304	-0.364189	0.189405	0.221658
LINC00504	ENSG00000248360.7	lncRNA	297.859	0.431903	0.224896	0.222647
COTL1	ENSG00000103187.8	protein_coding	5950.55	0.222513	0.11594	0.222927
STX8	ENSG00000170310.15	protein_coding	118.552	-0.483123	0.251747	0.222927
CUTA	ENSG00000112514.16	protein_coding	146.76	-0.388467	0.20252	0.223183
MBNL3	ENSG00000076770.14	protein_coding	1430.21	0.216127	0.112825	0.223405
EPB41	ENSG00000159023.21	protein_coding	3278.09	0.185671	0.0969369	0.223405
CHMP5	ENSG00000086065.14	protein_coding	549.911	-0.185908	0.0969948	0.223405
ZRSR2	ENSG00000169249.12	protein_coding	350.619	-0.340625	0.177672	0.223405
H4C15	ENSG00000270276.2	protein_coding	389.447	-0.386197	0.201531	0.223405
KMT2E	ENSG00000005483.21	protein_coding	849.801	0.178105	0.0930257	0.22355
GGA2	ENSG00000103365.15	protein_coding	240.903	0.430345	0.224824	0.223561
UQCRC2	ENSG00000140740.11	protein_coding	138.251	0.361891	0.189246	0.224098
UPF2	ENSG00000151461.20	protein_coding	839.868	0.249346	0.130367	0.224098
KIDINS220	ENSG00000134313.15	protein_coding	448.79	0.436082	0.228162	0.2244
DCP2	ENSG00000172795.16	protein_coding	516.746	0.318779	0.166886	0.224767
EMB	ENSG00000170571.12	protein_coding	208.995	-0.350031	0.183321	0.224955
RBM17	ENSG00000134453.16	protein_coding	361.861	-0.360616	0.189033	0.225622
RASAL2-AS1	ENSG00000224687.2	lncRNA	253.674	0.551224	0.28909	0.225714
PCSK6	ENSG00000140479.17	protein_coding	659.631	0.400182	0.209893	0.225714
COX17	ENSG00000138495.6	protein_coding	777.162	-0.220691	0.11577	0.225714
GIGYF2	ENSG00000204120.14	protein_coding	461.411	0.357283	0.18764	0.22646
DPYSL2	ENSG00000092964.18	protein_coding	294.165	0.301192	0.158187	0.22646
ACAT1	ENSG00000075239.14	protein_coding	90.2492	0.521894	0.274491	0.227656
PPP6R3	ENSG00000110075.14	protein_coding	510.946	0.263093	0.138551	0.228707
MTMR2	ENSG00000087053.18	protein_coding	268.213	0.507205	0.267295	0.228717
TMEM185A	ENSG00000269556.8	protein_coding	291.58	0.378823	0.19969	0.228717
CTSD	ENSG00000117984.14	protein_coding	229.052	0.360169	0.189726	0.228717
SNRNP200	ENSG00000144028.15	protein_coding	387.153	0.357337	0.188386	0.228717
CHMP4A	ENSG00000254505.10	protein_coding	418.099	-0.282686	0.148979	0.228717
PSME3	ENSG00000131467.11	protein_coding	278.574	0.344677	0.181807	0.228812
CAPN2	ENSG00000162909.18	protein_coding	825.821	0.292407	0.154228	0.228812
CCPG1	ENSG00000260916.7	protein_coding	1571.09	0.317572	0.167614	0.229217
SPPL3	ENSG00000157837.16	protein_coding	2625.16	-0.289669	0.153044	0.229809
UBE2N	ENSG00000177889.10	protein_coding	271.969	-0.409893	0.216552	0.229809
EID1	ENSG00000255302.5	protein_coding	1195.02	-0.154215	0.0815388	0.230336
ILF2	ENSG00000143621.17	protein_coding	140.534	-0.426151	0.225431	0.230612
LEPROTL1	ENSG00000104660.19	protein_coding	101.904	0.422662	0.224487	0.23441
SMIM20	ENSG00000250317.8	protein_coding	87.9727	-0.465544	0.247505	0.235175
NSD2	ENSG00000109685.18	protein_coding	155.932	0.439385	0.233765	0.235676
MNAT1	ENSG00000020426.11	protein_coding	93.4645	0.420557	0.224152	0.237274
GPX4	ENSG00000167468.17	protein_coding	12823.9	-0.244755	0.1305	0.237431
LMBR1	ENSG00000105983.22	protein_coding	146.476	0.399109	0.212962	0.237467
TPM4	ENSG00000167460.17	protein_coding	19287	0.332485	0.177325	0.237467
CCT5	ENSG00000150753.12	protein_coding	543.374	-0.331402	0.176858	0.237467
SNRPD3	ENSG00000100028.12	protein_coding	237.029	-0.445718	0.237846	0.237467
YTHDC1	ENSG00000083896.12	protein_coding	643.182	-0.314922	0.168103	0.237492
DDX46	ENSG00000145833.16	protein_coding	476.594	-0.319571	0.170711	0.238022
NCOA7	ENSG00000111912.20	protein_coding	525.497	-0.258816	0.13835	0.238265
TMSB10	ENSG00000034510.6	protein_coding	2491.44	-0.295081	0.157734	0.238265
TASOR	ENSG00000163946.13	protein_coding	502.096	0.31717	0.169641	0.238506
AIDA	ENSG00000186063.13	protein_coding	338.527	0.302873	0.162023	0.238506
DRAP1	ENSG00000175550.8	protein_coding	1107.13	-0.274729	0.146986	0.238506
CTBP1	ENSG00000159692.15	protein_coding	201.321	0.384617	0.205825	0.23852
COA5	ENSG00000183513.9	protein_coding	236.502	-0.40589	0.217328	0.238853
ILRUN	ENSG00000196821.10	protein_coding	256.483	0.325285	0.174457	0.239994
ZC3H7A	ENSG00000122299.12	protein_coding	532.251	0.287683	0.154245	0.239994
BUD31	ENSG00000106245.11	protein_coding	295.285	-0.235303	0.126214	0.239994
YAF2	ENSG00000015153.14	protein_coding	106.341	-0.364768	0.195731	0.240155
WNK1	ENSG00000060237.17	protein_coding	1099.53	0.346878	0.186259	0.240333
DNAJC2	ENSG00000105821.15	protein_coding	537.742	-0.191365	0.102765	0.240333
PWP1	ENSG00000136045.12	protein_coding	168.419	-0.447885	0.240528	0.240333
AL360020.1	ENSG00000286834.1	lncRNA	1928.7	0.522541	0.281365	0.24184
USP3	ENSG00000140455.17	protein_coding	227.873	0.330785	0.178079	0.24184
RALB	ENSG00000144118.14	protein_coding	720.467	0.181141	0.0974656	0.24184
ARRB2	ENSG00000141480.18	protein_coding	452.63	-0.262072	0.141133	0.24184
EIF2S3	ENSG00000130741.11	protein_coding	621.858	-0.377097	0.203055	0.24184
TM2D1	ENSG00000162604.12	protein_coding	89.8049	-0.429917	0.231401	0.24184
PRDM2	ENSG00000116731.22	protein_coding	391.929	-0.321889	0.17351	0.242577
PPP1R2	ENSG00000184203.8	protein_coding	304.274	-0.332059	0.179043	0.242653
MBTD1	ENSG00000011258.16	protein_coding	576.928	0.272899	0.147343	0.24373
PTBP3	ENSG00000119314.15	protein_coding	642.071	0.265088	0.143189	0.24373
NDUFB4	ENSG00000065518.8	protein_coding	222.798	-0.292724	0.158138	0.24373
HES1	ENSG00000114315.4	protein_coding	121.605	-0.432259	0.233479	0.24373
SLAIN1	ENSG00000139737.22	protein_coding	71.8649	-0.4083	0.220664	0.243919
WAS	ENSG00000015285.11	protein_coding	251.149	0.388088	0.209859	0.244053
RBM41	ENSG00000089682.16	protein_coding	145.805	0.378825	0.204902	0.244094
RPL7A	ENSG00000148303.17	protein_coding	1956.19	-0.305564	0.165332	0.244221
ISG20	ENSG00000172183.15	protein_coding	248.785	-0.423495	0.229281	0.244619
RAB1A	ENSG00000138069.18	protein_coding	1298.73	-0.211824	0.11482	0.24562
POLD4	ENSG00000175482.9	protein_coding	161.846	-0.348373	0.188882	0.245644
PI4KA	ENSG00000241973.11	protein_coding	203.694	0.35379	0.19201	0.246221
CSNK1A1	ENSG00000113712.18	protein_coding	490.222	0.186959	0.101462	0.246221
STX17	ENSG00000136874.11	protein_coding	181.083	0.412913	0.224306	0.246731
RWDD4	ENSG00000182552.15	protein_coding	121.739	-0.449624	0.244215	0.246731
FBXL3	ENSG00000005812.11	protein_coding	410.261	0.237336	0.129153	0.248288
VDAC2	ENSG00000165637.13	protein_coding	236.96	-0.256731	0.139935	0.24971
TSTD1	ENSG00000215845.11	protein_coding	138.302	-0.486011	0.26496	0.24971
TIMM8B	ENSG00000150779.12	protein_coding	309.936	-0.324331	0.176881	0.249858
SNHG5	ENSG00000203875.13	lncRNA	386.61	-0.385754	0.210455	0.250007
FAM227B	ENSG00000166262.16	protein_coding	73.0619	0.484333	0.264682	0.251029
NBPF14	ENSG00000270629.6	protein_coding	829.137	0.322761	0.176416	0.251029
RBM39	ENSG00000131051.24	protein_coding	2197.9	-0.15918	0.0870019	0.251029
NDEL1	ENSG00000166579.15	protein_coding	164.192	-0.394591	0.21557	0.251029
PLP2	ENSG00000102007.11	protein_coding	164.86	-0.371331	0.203256	0.252285
FIP1L1	ENSG00000145216.16	protein_coding	3533.17	-0.242679	0.13292	0.252714
ARPC4-TTLL3	ENSG00000250151.9	protein_coding	463.172	-0.335527	0.183819	0.252741
H2AC6	ENSG00000180573.9	protein_coding	15238	-0.309696	0.169839	0.253556
RNF111	ENSG00000157450.15	protein_coding	183.817	0.39345	0.215929	0.253949
CTNNBIP1	ENSG00000178585.15	protein_coding	218.976	-0.295811	0.162357	0.253949
TOMM6	ENSG00000214736.7	protein_coding	172.057	-0.561642	0.30892	0.255929
H2BC7	ENSG00000277224.2	protein_coding	758.684	-0.270098	0.14863	0.256179
DAD1	ENSG00000129562.11	protein_coding	3043.98	-0.292067	0.160811	0.25638
CYLD	ENSG00000083799.17	protein_coding	445.226	-0.369173	0.203321	0.25638
SEC61B	ENSG00000106803.10	protein_coding	235.732	-0.426227	0.234693	0.25638
YWHAE	ENSG00000108953.17	protein_coding	6380.42	0.241043	0.132783	0.256384
TBCE	ENSG00000284770.2	protein_coding	98.0242	0.385475	0.212709	0.256784
FCGR2A	ENSG00000143226.14	protein_coding	289.538	0.372474	0.205609	0.256784
TADA3	ENSG00000171148.13	protein_coding	276.72	0.28984	0.159999	0.256784
MGA	ENSG00000174197.16	protein_coding	341.077	0.276423	0.152404	0.256784
CAST	ENSG00000153113.23	protein_coding	828.12	0.176112	0.0971614	0.256784
SRPK2	ENSG00000135250.17	protein_coding	199.877	-0.322175	0.177794	0.256784
TMED4	ENSG00000158604.15	protein_coding	173.933	-0.373257	0.206049	0.256784
LITAF	ENSG00000189067.12	protein_coding	462.421	-0.378622	0.208984	0.256784
NET1	ENSG00000173848.19	protein_coding	413.556	0.343636	0.189843	0.257128
CCDC175	ENSG00000151838.12	protein_coding	1014.69	0.329787	0.182183	0.257128
EIF1AX	ENSG00000173674.11	protein_coding	259.515	0.303542	0.167864	0.257956
ZNF326	ENSG00000162664.17	protein_coding	217.382	-0.292795	0.162248	0.259816
ODF2	ENSG00000136811.16	protein_coding	175.318	0.225179	0.125	0.261411
NUCB2	ENSG00000070081.17	protein_coding	409.694	0.198759	0.110476	0.262521
EEF2	ENSG00000167658.16	protein_coding	4247.66	-0.285162	0.158562	0.262701
STIM1	ENSG00000167323.11	protein_coding	170.023	0.453197	0.252441	0.263856
CCDC82	ENSG00000149231.14	protein_coding	492.231	0.2675	0.148989	0.263856
SMIM14	ENSG00000163683.12	protein_coding	218.922	-0.418017	0.232763	0.263856
GCSAML	ENSG00000169224.13	protein_coding	198.278	0.392629	0.219038	0.264423
NPTN	ENSG00000156642.17	protein_coding	1541.83	0.331987	0.185226	0.264423
RMC1	ENSG00000141452.10	protein_coding	298.001	0.303785	0.169485	0.264423
SLAIN2	ENSG00000109171.15	protein_coding	1461.98	0.29668	0.165483	0.264423
NBR1	ENSG00000188554.14	protein_coding	451.175	0.195179	0.108896	0.264423
AGTPBP1	ENSG00000135049.15	protein_coding	511.948	-0.220676	0.1232	0.264859
SPCS3	ENSG00000129128.13	protein_coding	242.873	0.357001	0.199495	0.265421
ORC2	ENSG00000115942.9	protein_coding	144.813	-0.378607	0.211577	0.265421
PANK2	ENSG00000125779.22	protein_coding	258.773	0.272312	0.1523	0.265821
GTF3A	ENSG00000122034.15	protein_coding	557.493	-0.292857	0.163779	0.265821
HLA-DMA	ENSG00000204257.15	protein_coding	128.18	-0.408139	0.228369	0.266063
SNRNP70	ENSG00000104852.15	protein_coding	202.377	-0.304753	0.170631	0.26651
STAT6	ENSG00000166888.12	protein_coding	303.379	0.379844	0.21283	0.266599
PXK	ENSG00000168297.16	protein_coding	230.479	0.294109	0.164769	0.266599
TXN	ENSG00000136810.13	protein_coding	366.472	-0.209759	0.117518	0.266599
JAK1	ENSG00000162434.13	protein_coding	905.294	0.241024	0.135181	0.267214
HLA-DRA	ENSG00000204287.14	protein_coding	1150.14	-0.319958	0.179459	0.267214
CUX1	ENSG00000257923.11	protein_coding	1363.12	0.260015	0.145947	0.267369
ZCCHC17	ENSG00000121766.15	protein_coding	1988.2	-0.263648	0.147933	0.267369
CASC3	ENSG00000108349.17	protein_coding	667.113	-0.292826	0.164402	0.267369
PIN1	ENSG00000127445.13	protein_coding	235.441	-0.350997	0.197067	0.267369
U2AF2	ENSG00000063244.12	protein_coding	348.228	0.282459	0.158832	0.267491
RAP1GDS1	ENSG00000138698.14	protein_coding	227.803	0.277131	0.155813	0.267491
RNF6	ENSG00000127870.17	protein_coding	525.709	0.268283	0.150766	0.267491
AKIRIN1	ENSG00000174574.16	protein_coding	347.259	0.234418	0.131828	0.267491
HMGB1	ENSG00000189403.15	protein_coding	10175.2	-0.197859	0.111203	0.267491
RPL26L1	ENSG00000037241.7	protein_coding	219.442	-0.358613	0.201548	0.267491
LAMTOR5	ENSG00000134248.13	protein_coding	117.072	-0.397596	0.223557	0.267491
NANS	ENSG00000095380.11	protein_coding	123.119	-0.418464	0.235491	0.267985
RNF34	ENSG00000170633.16	protein_coding	312.075	-0.31199	0.175638	0.268145
BMP2K	ENSG00000138756.17	protein_coding	454.423	0.274201	0.154622	0.268859
SIN3A	ENSG00000169375.16	protein_coding	414.887	0.269253	0.151743	0.268859
MAF1	ENSG00000179632.10	protein_coding	513.316	-0.170585	0.0962016	0.268859
SUZ12	ENSG00000178691.11	protein_coding	833.246	-0.203045	0.114444	0.268859
CIAO2B	ENSG00000166595.12	protein_coding	90.8496	-0.354423	0.199853	0.268859
RHOC	ENSG00000155366.16	protein_coding	322.932	0.261783	0.147817	0.269706
KIAA1841	ENSG00000162929.14	protein_coding	616.379	-0.295653	0.166917	0.269706
SECISBP2	ENSG00000187742.15	protein_coding	952.778	-0.260501	0.147175	0.270058
USP47	ENSG00000170242.18	protein_coding	510.669	0.285767	0.161769	0.27144
PRDX6	ENSG00000117592.9	protein_coding	3884.37	-0.289606	0.163932	0.27144
RAP2B	ENSG00000181467.5	protein_coding	818.497	0.223537	0.126686	0.272403
RTF1	ENSG00000137815.14	protein_coding	475.586	0.38793	0.219993	0.272846
BROX	ENSG00000162819.12	protein_coding	2410.44	-0.227071	0.128831	0.273111
COX7A2L	ENSG00000115944.15	protein_coding	455.326	-0.240202	0.136641	0.275641
LSM5	ENSG00000106355.10	protein_coding	163.191	-0.410869	0.233795	0.275668
SFI1	ENSG00000198089.16	protein_coding	132.991	-0.42286	0.240658	0.275668
FAU	ENSG00000149806.11	protein_coding	3053.96	-0.302844	0.172398	0.275708
UBE2J1	ENSG00000198833.7	protein_coding	859.076	0.185294	0.105508	0.275748
NDUFB7	ENSG00000099795.7	protein_coding	242.474	-0.373834	0.212919	0.275789
SNRPA1	ENSG00000131876.17	protein_coding	109.456	0.423601	0.241664	0.277074
EEF1G	ENSG00000254772.10	protein_coding	4292.89	-0.277691	0.158395	0.277074
PSMB7	ENSG00000136930.13	protein_coding	110.476	-0.410455	0.234317	0.277531
SLFN14	ENSG00000236320.3	protein_coding	585.838	0.296738	0.169563	0.278317
OXA1L	ENSG00000155463.14	protein_coding	292.448	-0.346257	0.197925	0.278439
EEF1A1	ENSG00000156508.18	protein_coding	24747.8	-0.29471	0.16854	0.278707
ZFAND5	ENSG00000107372.13	protein_coding	262.104	0.301086	0.17227	0.278993
AC060780.1	ENSG00000267002.4	lncRNA	366.679	0.523473	0.299746	0.279043
BX890604.2	ENSG00000285756.2	lncRNA	277.494	0.365361	0.209227	0.279043
WDR26	ENSG00000162923.16	protein_coding	741.216	0.233278	0.133594	0.279043
YWHAQ	ENSG00000134308.14	protein_coding	883.861	0.190501	0.10912	0.279043
APRT	ENSG00000198931.11	protein_coding	138.386	-0.406684	0.232941	0.279043
CKAP5	ENSG00000175216.15	protein_coding	527.081	0.372775	0.213591	0.279123
WDR41	ENSG00000164253.14	protein_coding	252.991	-0.306767	0.175824	0.27922
TP53BP2	ENSG00000143514.17	protein_coding	214.648	0.344123	0.197299	0.279338
MRPS9	ENSG00000135972.9	protein_coding	175.635	-0.320448	0.183842	0.27978
FAM204A	ENSG00000165669.14	protein_coding	304.04	-0.217638	0.124956	0.280365
BLVRA	ENSG00000106605.11	protein_coding	226.113	-0.346407	0.19898	0.280616
MTMR10	ENSG00000166912.17	protein_coding	471.131	-0.276441	0.159009	0.281834
PF4V1	ENSG00000109272.4	protein_coding	9185.87	-0.463175	0.266479	0.281845
RPS6KA1	ENSG00000117676.14	protein_coding	177.772	0.417794	0.240457	0.282
PRDX1	ENSG00000117450.14	protein_coding	194.324	-0.341712	0.196717	0.282029
RANBP1	ENSG00000099901.17	protein_coding	391.998	-0.325603	0.187512	0.282188
TMEM40	ENSG00000088726.16	protein_coding	810.616	0.334523	0.192708	0.282284
PSAP	ENSG00000197746.14	protein_coding	1711.45	0.28264	0.163255	0.284636
CENPK	ENSG00000123219.13	protein_coding	163.284	-0.322957	0.186529	0.284636
NSMCE1	ENSG00000169189.17	protein_coding	142.899	-0.406062	0.234626	0.284771
DROSHA	ENSG00000113360.16	protein_coding	154.576	0.403683	0.233633	0.285354
HDGF	ENSG00000143321.19	protein_coding	1561.24	0.223269	0.129177	0.285354
HMGB2	ENSG00000164104.12	protein_coding	1213.65	-0.207527	0.120061	0.285354
RPS17	ENSG00000182774.13	protein_coding	3404.77	-0.313132	0.181168	0.285354
MRPL23	ENSG00000214026.11	protein_coding	129.585	-0.468563	0.271137	0.285354
GATAD2A	ENSG00000167491.17	protein_coding	694.368	0.192967	0.11173	0.285595
UBP1	ENSG00000153560.12	protein_coding	203.508	0.314796	0.182579	0.287149
SART3	ENSG00000075856.12	protein_coding	204.271	0.417958	0.242522	0.287401
DHX9	ENSG00000135829.17	protein_coding	324.212	0.273724	0.15887	0.287447
DMTF1	ENSG00000135164.18	protein_coding	83.9142	0.455721	0.264618	0.287634
H3C11	ENSG00000275379.1	protein_coding	252.939	-0.413354	0.240059	0.287634
FBXO11	ENSG00000138081.20	protein_coding	377.182	0.260711	0.151497	0.287649
NARS1	ENSG00000134440.12	protein_coding	359.606	-0.264618	0.153781	0.287649
SEPTIN1	ENSG00000180096.12	protein_coding	228.789	-0.278683	0.161914	0.287649
MPIG6B	ENSG00000204420.10	protein_coding	2568.01	0.381106	0.221687	0.287967
PIK3C2A	ENSG00000011405.13	protein_coding	234.187	0.378955	0.220377	0.287967
NRBP1	ENSG00000115216.14	protein_coding	608.888	0.255322	0.148509	0.287967
ZFAND2A	ENSG00000178381.12	protein_coding	182.328	-0.311972	0.181551	0.288196
AL451165.2	ENSG00000272288.6	lncRNA	133.719	-0.518384	0.301757	0.288264
DYNC1H1	ENSG00000197102.12	protein_coding	570.395	0.272611	0.158846	0.289075
SAR1A	ENSG00000079332.15	protein_coding	216.198	0.341096	0.198853	0.289223
MAPKAP1	ENSG00000119487.17	protein_coding	367.978	-0.20529	0.119687	0.289223
SLC25A43	ENSG00000077713.19	protein_coding	225.479	-0.310657	0.181339	0.290275
ZC3H11A	ENSG00000058673.16	protein_coding	447.991	0.310769	0.181521	0.290339
GTF2B	ENSG00000137947.12	protein_coding	385.136	-0.257103	0.15021	0.290339
RPS8	ENSG00000142937.12	protein_coding	2460.19	-0.289727	0.169214	0.290339
TGFBR2	ENSG00000163513.19	protein_coding	283.03	-0.311584	0.182048	0.290339
CTDSPL	ENSG00000144677.15	protein_coding	453.455	0.347929	0.203392	0.290677
PCAT1	ENSG00000253438.4	lncRNA	164.848	0.296655	0.1738	0.292449
SUCO	ENSG00000094975.14	protein_coding	300.965	0.293469	0.172004	0.292449
RCC2	ENSG00000179051.14	protein_coding	215.043	0.263447	0.154431	0.292449
ARID4B	ENSG00000054267.22	protein_coding	749.958	-0.19875	0.116471	0.292449
IK	ENSG00000113141.18	protein_coding	1146.92	-0.284979	0.167023	0.292449
MRPS18B	ENSG00000204568.12	protein_coding	143.704	-0.451081	0.264796	0.293719
UBE2G2	ENSG00000184787.19	protein_coding	181.851	-0.373712	0.219492	0.29404
LINC01088	ENSG00000249307.7	lncRNA	370.249	0.49584	0.291649	0.295362
FAM76B	ENSG00000077458.13	protein_coding	107.69	-0.395086	0.232684	0.296492
SMG1	ENSG00000157106.16	protein_coding	541.695	0.224544	0.132395	0.297475
SNX27	ENSG00000143376.14	protein_coding	200.92	0.315843	0.186356	0.29798
ZFC3H1	ENSG00000133858.16	protein_coding	389.221	0.363532	0.214558	0.298067
TJP2	ENSG00000119139.20	protein_coding	370.128	0.311933	0.184238	0.298231
TBC1D1	ENSG00000065882.16	protein_coding	545.513	0.201574	0.119066	0.298231
HNMT	ENSG00000150540.14	protein_coding	98.8659	-0.462878	0.273317	0.298231
TCEAL8	ENSG00000180964.17	protein_coding	317.027	-0.211865	0.125186	0.298352
ACTR1A	ENSG00000138107.13	protein_coding	180.084	0.384583	0.227519	0.299248
SLC25A6	ENSG00000169100.14	protein_coding	1110.52	-0.302297	0.178848	0.299248
BCL11A	ENSG00000119866.22	protein_coding	206.639	0.387418	0.229705	0.300165
ABLIM3	ENSG00000173210.19	protein_coding	1898.14	0.272731	0.161586	0.300165
GDE1	ENSG00000006007.12	protein_coding	203.001	0.226331	0.134136	0.300165
RPS14	ENSG00000164587.13	protein_coding	1598.37	-0.299699	0.177673	0.300165
SASH3	ENSG00000122122.10	protein_coding	307.373	-0.328288	0.194568	0.300165
LBH	ENSG00000213626.13	protein_coding	662.162	-0.343336	0.203355	0.300165
ECH1	ENSG00000104823.9	protein_coding	322.697	-0.292164	0.173456	0.301338
GNB2	ENSG00000172354.10	protein_coding	220.334	0.302868	0.179964	0.301487
CCNK	ENSG00000090061.17	protein_coding	167.56	0.290476	0.172594	0.301487
MTPN	ENSG00000105887.11	protein_coding	7659.62	0.266517	0.158389	0.301487
CDC26	ENSG00000176386.9	protein_coding	219.15	-0.322239	0.191387	0.301487
DNAJC6	ENSG00000116675.16	protein_coding	349.665	-0.310054	0.184401	0.302051
NFX1	ENSG00000086102.19	protein_coding	332.308	0.322199	0.191838	0.303009
GTF2F1	ENSG00000125651.14	protein_coding	432.449	-0.293738	0.175025	0.303582
ZYX	ENSG00000159840.16	protein_coding	1734.58	0.217428	0.129606	0.303768
PSMB1	ENSG00000008018.9	protein_coding	279.28	-0.310632	0.185204	0.303768
OSTF1	ENSG00000134996.12	protein_coding	1468.62	-0.152156	0.0907482	0.303896
SUMO2	ENSG00000188612.12	protein_coding	1884.14	-0.156633	0.093463	0.304174
PPP3R1	ENSG00000221823.11	protein_coding	2528.36	0.229557	0.137113	0.304999
CD82	ENSG00000085117.12	protein_coding	237.786	0.357745	0.213935	0.306045
MAP3K2	ENSG00000169967.16	protein_coding	252.285	0.305111	0.182542	0.306299
DDX5	ENSG00000108654.15	protein_coding	1853.73	-0.202795	0.121462	0.307237
APP	ENSG00000142192.21	protein_coding	2992.67	0.364794	0.21872	0.308133
SUGT1	ENSG00000165416.14	protein_coding	201.215	-0.302501	0.181483	0.308563
NDUFS2	ENSG00000158864.12	protein_coding	111.892	0.377053	0.226339	0.308908
AP3B1	ENSG00000132842.13	protein_coding	285.573	0.295352	0.177329	0.308908
DNA2	ENSG00000138346.15	protein_coding	193.106	0.313777	0.188623	0.309068
CALD1	ENSG00000122786.20	protein_coding	2729.43	0.280226	0.168458	0.309068
GON4L	ENSG00000116580.18	protein_coding	504.283	0.229296	0.137836	0.309068
PPID	ENSG00000171497.5	protein_coding	242.052	-0.259521	0.155895	0.309068
TMEM14C	ENSG00000111843.14	protein_coding	114.803	-0.361343	0.217133	0.309068
NKG7	ENSG00000105374.10	protein_coding	223.175	-0.434583	0.261303	0.309068
TCEAL4	ENSG00000133142.17	protein_coding	548.635	-0.184054	0.110727	0.309423
BTG1	ENSG00000133639.6	protein_coding	347.491	-0.330602	0.199179	0.310736
TAB3	ENSG00000157625.15	protein_coding	208.625	0.308328	0.18598	0.311444
ATG3	ENSG00000144848.11	protein_coding	810.077	-0.214499	0.129346	0.311444
MYO1F	ENSG00000142347.19	protein_coding	546.141	-0.284106	0.171392	0.311444
UBE2D1	ENSG00000072401.15	protein_coding	150.243	-0.388504	0.234525	0.311909
RPN1	ENSG00000163902.12	protein_coding	258.752	-0.282931	0.170853	0.31204
GK	ENSG00000198814.12	protein_coding	280.228	0.449474	0.271716	0.312854
STIP1	ENSG00000168439.16	protein_coding	250.91	0.338949	0.204925	0.312854
CPT1A	ENSG00000110090.13	protein_coding	557.846	0.290189	0.175506	0.31299
FNIP1	ENSG00000217128.12	protein_coding	265.801	0.246228	0.148978	0.313187
MFSD6	ENSG00000151690.15	protein_coding	321.09	0.402026	0.243372	0.313524
MKLN1	ENSG00000128585.18	protein_coding	264.987	0.297635	0.180237	0.313641
CLCN3	ENSG00000109572.14	protein_coding	2278.79	0.290817	0.176175	0.313818
RTN2	ENSG00000125744.12	protein_coding	153.006	-0.384362	0.232905	0.313865
GOLGA4	ENSG00000144674.16	protein_coding	398.975	0.231825	0.140535	0.314088
PPIF	ENSG00000108179.14	protein_coding	224.451	0.368504	0.223507	0.314374
DGKE	ENSG00000153933.10	protein_coding	326.344	-0.264221	0.160287	0.314374
TBL1XR1	ENSG00000177565.17	protein_coding	776.73	0.28852	0.175084	0.314487
ARHGAP17	ENSG00000140750.17	protein_coding	237.68	0.307876	0.187047	0.3151
NCK2	ENSG00000071051.14	protein_coding	1083.42	0.280107	0.17026	0.3151
GADD45A	ENSG00000116717.13	protein_coding	1681.75	-0.30691	0.186553	0.3151
PTPRCAP	ENSG00000213402.3	protein_coding	181.411	-0.427376	0.2597	0.3151
STARD3NL	ENSG00000010270.13	protein_coding	125.59	0.299072	0.181899	0.31534
SPG7	ENSG00000197912.15	protein_coding	170.89	0.289263	0.175944	0.31534
EFCAB2	ENSG00000203666.12	protein_coding	272.093	-0.295875	0.180003	0.31534
PYGB	ENSG00000100994.12	protein_coding	727.79	0.302257	0.183954	0.315503
HIPK2	ENSG00000064393.16	protein_coding	1396.48	0.233674	0.142292	0.315853
UACA	ENSG00000137831.15	protein_coding	631.095	0.257815	0.157205	0.317071
UBE2V2	ENSG00000169139.12	protein_coding	181.227	-0.31925	0.194737	0.317228
RBM7	ENSG00000076053.10	protein_coding	271.299	-0.337787	0.206212	0.317866
EPSTI1	ENSG00000133106.14	protein_coding	958.217	-0.201389	0.123097	0.318783
AC010186.1	ENSG00000256442.2	lncRNA	775.842	-0.326634	0.199661	0.318783
ANKHD1	ENSG00000131503.21	protein_coding	391.204	0.248216	0.151926	0.319954
DDX41	ENSG00000183258.12	protein_coding	177.389	-0.293372	0.179824	0.321268
BMI1	ENSG00000168283.14	protein_coding	291.253	0.346166	0.212257	0.321405
EIF4A2	ENSG00000156976.17	protein_coding	620.85	-0.205735	0.126387	0.323189
DYNC1LI2	ENSG00000135720.13	protein_coding	328.498	0.337248	0.207741	0.325884
ILF3	ENSG00000129351.17	protein_coding	325.6	0.395156	0.243543	0.326227
PHF8	ENSG00000172943.19	protein_coding	150.665	-0.409706	0.252749	0.327012
MGAT5	ENSG00000152127.9	protein_coding	380.77	0.385017	0.237606	0.327173
VAV3	ENSG00000134215.16	protein_coding	260.548	0.337952	0.208722	0.327723
ANXA1	ENSG00000135046.14	protein_coding	566.401	-0.311791	0.192599	0.327723
FAM89B	ENSG00000176973.8	protein_coding	171.538	-0.232133	0.14352	0.328211
HHEX	ENSG00000152804.11	protein_coding	166.145	-0.269164	0.1664	0.328211
ZDHHC7	ENSG00000153786.12	protein_coding	309.553	-0.318145	0.196908	0.329121
HADHB	ENSG00000138029.14	protein_coding	267.94	-0.286797	0.177606	0.329494
PTEN	ENSG00000171862.11	protein_coding	725.7	0.264043	0.16357	0.32962
WDR7	ENSG00000091157.13	protein_coding	246.462	-0.356289	0.220778	0.32969
UNC13D	ENSG00000092929.11	protein_coding	305.259	0.318194	0.197247	0.32986
SNX4	ENSG00000114520.11	protein_coding	154.524	-0.292621	0.181526	0.330108
PSMB10	ENSG00000205220.12	protein_coding	192.129	-0.342452	0.212389	0.330108
SNRPE	ENSG00000182004.13	protein_coding	180.843	-0.426748	0.264775	0.330108
EMP3	ENSG00000142227.11	protein_coding	638.771	-0.215638	0.134149	0.331561
PDCD6	ENSG00000249915.8	protein_coding	208.475	-0.29378	0.182693	0.331561
RBM34	ENSG00000188739.15	protein_coding	175.016	-0.318995	0.198329	0.331561
HSPD1	ENSG00000144381.17	protein_coding	281.268	-0.329622	0.20503	0.331561
AC008014.1	ENSG00000257261.6	lncRNA	159.199	-0.422733	0.262865	0.331561
ELK3	ENSG00000111145.8	protein_coding	695.432	0.273638	0.170281	0.331639
IMPA2	ENSG00000141401.12	protein_coding	117.871	0.430469	0.268029	0.331652
PANK3	ENSG00000120137.7	protein_coding	538.555	-0.296551	0.184622	0.331652
HDHD2	ENSG00000167220.12	protein_coding	154.268	-0.374159	0.23299	0.331652
DPM1	ENSG00000000419.12	protein_coding	90.7217	-0.376744	0.23468	0.33178
CHIC1	ENSG00000204116.11	protein_coding	93.9922	0.384499	0.2397	0.332119
PKIA	ENSG00000171033.13	protein_coding	187.396	0.339801	0.211874	0.332119
SRP19	ENSG00000153037.15	protein_coding	188.333	-0.34883	0.217493	0.332119
MAP4K2	ENSG00000168067.12	protein_coding	296.329	0.358679	0.223882	0.33251
FOXO3	ENSG00000118689.15	protein_coding	777.324	0.322408	0.201228	0.33251
DHX38	ENSG00000140829.12	protein_coding	249.111	0.306458	0.191242	0.33251
LAMTOR3	ENSG00000109270.13	protein_coding	109.511	-0.321475	0.200696	0.33251
LPP	ENSG00000145012.13	protein_coding	692.463	0.336782	0.21093	0.335314
PITPNA	ENSG00000174238.15	protein_coding	211.999	0.301532	0.188804	0.335314
PRKCD	ENSG00000163932.15	protein_coding	457.132	0.214337	0.134247	0.335314
ATOX1	ENSG00000177556.12	protein_coding	146.488	-0.296401	0.185908	0.336364
OTUB1	ENSG00000167770.11	protein_coding	147.895	-0.339508	0.21293	0.336364
KLHL5	ENSG00000109790.16	protein_coding	492.698	0.366832	0.230265	0.336977
ZNF664	ENSG00000179195.16	protein_coding	526.974	0.285569	0.179565	0.33813
RPL14	ENSG00000188846.14	protein_coding	5248.2	-0.312624	0.196567	0.33813
RBM22	ENSG00000086589.12	protein_coding	127.724	-0.358791	0.225517	0.33813
NDUFA2	ENSG00000131495.8	protein_coding	130.153	-0.31621	0.198903	0.338277
NARF	ENSG00000141562.18	protein_coding	164.13	0.336448	0.211698	0.338339
CALR	ENSG00000179218.13	protein_coding	319.358	0.239748	0.150882	0.338339
EIF5	ENSG00000100664.11	protein_coding	552.026	0.214299	0.134968	0.338918
OAZ1	ENSG00000104904.12	protein_coding	8416.11	-0.187414	0.118071	0.339005
MAPK1	ENSG00000100030.14	protein_coding	773.443	0.15361	0.0968007	0.339056
IDH3A	ENSG00000166411.14	protein_coding	196.784	-0.330544	0.20842	0.339446
SF3B6	ENSG00000115128.7	protein_coding	200.09	-0.285713	0.180309	0.339905
TYROBP	ENSG00000011600.12	protein_coding	931.462	-0.314576	0.1985	0.339905
EIF4G2	ENSG00000110321.17	protein_coding	2974.2	0.165227	0.104362	0.340601
INO80C	ENSG00000153391.15	protein_coding	99.8481	0.421164	0.266097	0.340675
PTPN11	ENSG00000179295.17	protein_coding	434.834	0.216008	0.136524	0.340791
LINC02732	ENSG00000254416.6	lncRNA	83.2146	-0.327039	0.206741	0.340791
EIF3D	ENSG00000100353.18	protein_coding	519.97	-0.282071	0.1786	0.342291
MAN1A2	ENSG00000198162.12	protein_coding	8159.23	-0.174495	0.11067	0.343853
PDCD4	ENSG00000150593.18	protein_coding	979.244	-0.226802	0.143999	0.344781
ARHGEF7	ENSG00000102606.18	protein_coding	157.024	0.335997	0.213412	0.344968
ABI3	ENSG00000108798.9	protein_coding	296.976	-0.310369	0.197261	0.345424
VPS13B	ENSG00000132549.18	protein_coding	320.245	0.35497	0.226398	0.346567
SPTY2D1	ENSG00000179119.15	protein_coding	181.303	0.348744	0.222421	0.346567
SPARC	ENSG00000113140.11	protein_coding	9572.75	0.334733	0.213163	0.346567
RCL1	ENSG00000120158.12	protein_coding	111.625	0.312654	0.199151	0.346567
RHBDD1	ENSG00000144468.17	protein_coding	658.696	0.2679	0.170767	0.346567
TM9SF3	ENSG00000077147.16	protein_coding	367.806	0.233235	0.148517	0.346567
TACC1	ENSG00000147526.20	protein_coding	713.958	0.205819	0.131044	0.346567
SEPTIN7	ENSG00000122545.20	protein_coding	6040.35	0.187738	0.119691	0.346567
RABGAP1L	ENSG00000152061.23	protein_coding	4204.11	0.185453	0.118172	0.346567
DLEU1	ENSG00000176124.14	lncRNA	251.809	-0.259799	0.165539	0.346567
PCF11	ENSG00000165494.11	protein_coding	257.349	0.284422	0.18157	0.346569
PPP1R9B	ENSG00000108819.11	protein_coding	628.464	0.283099	0.180796	0.346569
SELENOK	ENSG00000113811.11	protein_coding	176.938	-0.307632	0.196361	0.346569
CBWD5	ENSG00000147996.16	protein_coding	145.056	-0.374364	0.239085	0.346569
S100A12	ENSG00000163221.9	protein_coding	178.425	-0.405389	0.258729	0.346569
PVALB	ENSG00000100362.13	protein_coding	591.785	-0.475057	0.303339	0.346569
GNG11	ENSG00000127920.6	protein_coding	14145.5	-0.301596	0.192674	0.346673
TGFB1	ENSG00000105329.10	protein_coding	5308.51	0.263489	0.168622	0.347593
ARPC1A	ENSG00000241685.10	protein_coding	172.531	0.260214	0.166436	0.347593
PPP1CB	ENSG00000213639.10	protein_coding	1007.76	0.19564	0.125175	0.347593
COX19	ENSG00000240230.6	protein_coding	136.679	-0.455682	0.291535	0.347593
SMCO4	ENSG00000166002.7	protein_coding	76.0538	0.437298	0.280032	0.348026
ITGB3BP	ENSG00000142856.16	protein_coding	448.256	-0.24542	0.157191	0.348026
BIRC6	ENSG00000115760.14	protein_coding	594.352	0.298823	0.191472	0.348216
ENSA	ENSG00000143420.18	protein_coding	399.917	-0.200752	0.12871	0.348628
SMC6	ENSG00000163029.16	protein_coding	384.748	0.259071	0.166218	0.348675
ANKRD13A	ENSG00000076513.17	protein_coding	224.603	0.252755	0.162136	0.348675
CYCS	ENSG00000172115.9	protein_coding	1116.43	-0.251596	0.161411	0.348675
MAN2A2	ENSG00000196547.15	protein_coding	220.967	0.360488	0.231729	0.350503
RAB3IP	ENSG00000127328.21	protein_coding	152.482	0.309234	0.198827	0.350507
CAPZA2	ENSG00000198898.14	protein_coding	2562.2	0.225257	0.144911	0.350619
MYL12A	ENSG00000101608.12	protein_coding	28424	-0.229152	0.147391	0.350619
BCAP29	ENSG00000075790.10	protein_coding	269.584	0.381022	0.245237	0.350906
MTSS1	ENSG00000170873.18	protein_coding	585.134	0.253364	0.163289	0.3521
SRSF7	ENSG00000115875.19	protein_coding	166.927	-0.353457	0.228036	0.352996
TNFAIP8	ENSG00000145779.8	protein_coding	515.014	-0.24314	0.156936	0.353065
GKAP1	ENSG00000165113.13	protein_coding	138.648	-0.248432	0.16036	0.353065
SCGB3A2	ENSG00000164265.9	protein_coding	137.195	0.560231	0.361773	0.353197
RBL1	ENSG00000080839.12	protein_coding	349.446	-0.258888	0.167204	0.353197
MAP2K2	ENSG00000126934.13	protein_coding	295.512	-0.259552	0.168016	0.355433
ZNF106	ENSG00000103994.17	protein_coding	629.313	0.309718	0.20065	0.355993
POLR1D	ENSG00000186184.18	protein_coding	489.077	-0.197575	0.128019	0.355993
SMARCC2	ENSG00000139613.12	protein_coding	466.03	-0.261773	0.169681	0.356164
MS4A6A	ENSG00000110077.14	protein_coding	127.367	-0.365665	0.237291	0.35714
ARNT	ENSG00000143437.21	protein_coding	285.791	0.26297	0.170771	0.357677
CDK11A	ENSG00000008128.23	protein_coding	313.013	0.452009	0.293689	0.358014
NOL7	ENSG00000225921.7	protein_coding	714.586	-0.291019	0.189192	0.358373
PPFIBP1	ENSG00000110841.14	protein_coding	222.149	0.362332	0.236171	0.359101
MRS2	ENSG00000124532.14	protein_coding	166.815	0.286468	0.186713	0.359101
MAGED2	ENSG00000102316.17	protein_coding	258.096	0.263143	0.171519	0.359101
HMG20B	ENSG00000064961.19	protein_coding	422.946	0.235027	0.153201	0.359101
ACADM	ENSG00000117054.13	protein_coding	324.209	0.199869	0.130058	0.359101
PARN	ENSG00000140694.17	protein_coding	423.571	-0.214745	0.139832	0.359101
MDM2	ENSG00000135679.25	protein_coding	423.63	-0.244463	0.159246	0.359101
LAMTOR4	ENSG00000188186.10	protein_coding	171.699	-0.290663	0.189396	0.359101
OPA1	ENSG00000198836.10	protein_coding	518.847	-0.337998	0.220176	0.359101
TFDP1	ENSG00000198176.13	protein_coding	237.663	0.354816	0.231394	0.359127
NDUFS6	ENSG00000145494.11	protein_coding	286.012	-0.250064	0.163049	0.359127
UBXN2B	ENSG00000215114.9	protein_coding	96.6758	0.333282	0.217452	0.35939
PPM1B	ENSG00000138032.21	protein_coding	306.849	-0.284611	0.185814	0.359837
RAB11A	ENSG00000103769.10	protein_coding	7795.02	0.255638	0.166969	0.360052
H3C3	ENSG00000287080.1	protein_coding	108.185	0.482159	0.315125	0.36022
IPO11	ENSG00000086200.16	protein_coding	138.196	0.305771	0.199878	0.36022
NAP1L1	ENSG00000187109.14	protein_coding	28131.3	0.230138	0.150422	0.36022
CYTIP	ENSG00000115165.10	protein_coding	327.389	-0.295141	0.193	0.36038
ZSWIM7	ENSG00000214941.8	protein_coding	295.1	-0.26188	0.171473	0.361546
EIF3F	ENSG00000175390.14	protein_coding	409.741	-0.286505	0.187679	0.361776
PRPSAP2	ENSG00000141127.15	protein_coding	244.696	-0.298118	0.195367	0.361985
FBXW11	ENSG00000072803.17	protein_coding	337.818	-0.243122	0.15938	0.362104
KATNA1	ENSG00000186625.14	protein_coding	119.034	-0.297559	0.195116	0.362142
UGP2	ENSG00000169764.15	protein_coding	821.962	-0.163828	0.107594	0.363589
H2BC21	ENSG00000184678.10	protein_coding	1902.65	0.25842	0.169927	0.364691
CORO1B	ENSG00000172725.14	protein_coding	220.547	-0.2286	0.150364	0.364782
FAM177A1	ENSG00000151327.12	protein_coding	704.935	-0.218855	0.144033	0.365126
EFCAB13	ENSG00000178852.16	protein_coding	1349.03	0.266339	0.175593	0.366559
EIF3A	ENSG00000107581.13	protein_coding	1330.64	0.201263	0.132673	0.366559
TMEM154	ENSG00000170006.12	protein_coding	262.853	0.407888	0.2691	0.367023
CNTRL	ENSG00000119397.16	protein_coding	475.483	-0.251615	0.166031	0.367023
NKTR	ENSG00000114857.18	protein_coding	213.645	0.330909	0.218661	0.368063
H3C2	ENSG00000286522.1	protein_coding	868.889	-0.238941	0.157878	0.368063
PCYT1B	ENSG00000102230.14	protein_coding	379.446	0.340849	0.225319	0.368246
CLIP1	ENSG00000130779.20	protein_coding	715.634	0.201914	0.133513	0.368267
MND1	ENSG00000121211.8	protein_coding	212.393	-0.296575	0.196143	0.368267
UBE2D2	ENSG00000131508.16	protein_coding	652.689	-0.221522	0.146987	0.371191
RICTOR	ENSG00000164327.13	protein_coding	194.45	-0.285853	0.189689	0.371191
BCAS3	ENSG00000141376.22	protein_coding	97.3819	0.387776	0.257492	0.371409
AP2B1	ENSG00000006125.18	protein_coding	760.27	0.214785	0.142593	0.371409
ERGIC1	ENSG00000113719.16	protein_coding	222.862	0.332382	0.22092	0.37196
RPL10	ENSG00000147403.16	protein_coding	2347.86	-0.253308	0.168356	0.37196
RASGRP2	ENSG00000068831.19	protein_coding	502.139	0.189704	0.126158	0.372313
ANK1	ENSG00000029534.20	protein_coding	664.073	0.260275	0.173181	0.372648
CTDNEP1	ENSG00000175826.12	protein_coding	178.31	0.30718	0.204455	0.372742
SARS1	ENSG00000031698.13	protein_coding	422.06	-0.261259	0.174134	0.373866
BCCIP	ENSG00000107949.17	protein_coding	204.771	-0.308054	0.205341	0.373866
AIG1	ENSG00000146416.19	protein_coding	659.471	0.329432	0.219946	0.374666
KDM3A	ENSG00000115548.17	protein_coding	239.301	0.32706	0.218318	0.374666
CDK5RAP2	ENSG00000136861.18	protein_coding	329.438	0.30752	0.205363	0.374666
RILPL2	ENSG00000150977.10	protein_coding	725.915	0.117534	0.07848	0.374666
UBE3B	ENSG00000151148.14	protein_coding	220.99	-0.326465	0.218019	0.374666
TMEM87B	ENSG00000153214.11	protein_coding	288.578	0.371691	0.248365	0.374801
COPS3	ENSG00000141030.13	protein_coding	215.045	-0.261029	0.174383	0.374801
ACYP2	ENSG00000170634.13	protein_coding	173.061	-0.326192	0.21811	0.375295
SRP54	ENSG00000100883.12	protein_coding	172.121	-0.263621	0.176359	0.37558
YOD1	ENSG00000180667.10	protein_coding	514.769	0.3353	0.224363	0.375591
LST1	ENSG00000204482.10	protein_coding	1003.14	0.26575	0.178051	0.37654
HIPK1	ENSG00000163349.22	protein_coding	581.017	0.237452	0.1591	0.37654
GPBP1L1	ENSG00000159592.11	protein_coding	374.415	-0.217861	0.14625	0.378205
AP000640.2	ENSG00000255355.1	lncRNA	174.315	-0.429126	0.288098	0.378205
SELL	ENSG00000188404.10	protein_coding	308.682	-0.326524	0.219491	0.379326
SNRPN	ENSG00000128739.22	protein_coding	1198.15	-0.188344	0.126776	0.380505
RPS2	ENSG00000140988.16	protein_coding	3715.63	-0.283971	0.19118	0.380505
SRP68	ENSG00000167881.15	protein_coding	211.307	0.326568	0.220048	0.381198
CDV3	ENSG00000091527.15	protein_coding	1111.41	0.184104	0.124129	0.381624
PSMC2	ENSG00000161057.12	protein_coding	108.351	-0.361872	0.244094	0.381854
ABHD10	ENSG00000144827.9	protein_coding	103.237	-0.331482	0.223662	0.381929
Z82195.3	ENSG00000287160.1	lncRNA	925.8	0.483776	0.326894	0.382277
NONO	ENSG00000147140.16	protein_coding	664.662	0.221027	0.149326	0.382277
PRKACB	ENSG00000142875.19	protein_coding	1960.82	0.206119	0.139207	0.382277
SMIM30	ENSG00000214194.9	protein_coding	143	-0.256807	0.173379	0.382277
CYFIP1	ENSG00000273749.5	protein_coding	166.481	0.327977	0.221975	0.382547
ENO1	ENSG00000074800.16	protein_coding	1483.98	-0.112357	0.0760347	0.382547
SRSF9	ENSG00000111786.9	protein_coding	616.954	-0.213697	0.144546	0.382547
S100A11	ENSG00000163191.6	protein_coding	1893.1	-0.261937	0.177276	0.382547
NSA2	ENSG00000164346.10	protein_coding	655.001	-0.294093	0.198846	0.382547
C12orf65	ENSG00000130921.8	protein_coding	209.984	-0.336437	0.227548	0.382547
LINC02503	ENSG00000249614.2	lncRNA	184.505	0.430158	0.291541	0.383314
TATDN1	ENSG00000147687.19	protein_coding	159.429	-0.232059	0.157304	0.383314
TPST1	ENSG00000169902.15	protein_coding	181.136	-0.365086	0.247408	0.383314
TIMM9	ENSG00000100575.14	protein_coding	50.9515	-0.378428	0.256535	0.383314
PRR11	ENSG00000068489.12	protein_coding	233.344	0.432321	0.293265	0.383796
BIRC3	ENSG00000023445.15	protein_coding	302.102	-0.399202	0.27096	0.384193
AC007262.2	ENSG00000284959.2	lncRNA	382.171	-0.280338	0.1905	0.385199
SCAF11	ENSG00000139218.18	protein_coding	820.277	0.243655	0.165745	0.386082
PABPN1	ENSG00000100836.10	protein_coding	794.502	0.106585	0.0725726	0.386863
ZNF672	ENSG00000171161.13	protein_coding	169.423	0.33341	0.22709	0.386889
UBE2H	ENSG00000186591.13	protein_coding	1070.19	0.209054	0.14241	0.386889
LTBP1	ENSG00000049323.16	protein_coding	2299.64	0.25708	0.175326	0.387427
NENF	ENSG00000117691.10	protein_coding	585.741	-0.234419	0.15985	0.387427
MAP2K5	ENSG00000137764.20	protein_coding	104.452	-0.318033	0.216904	0.387427
WDR44	ENSG00000131725.14	protein_coding	1216.09	0.225587	0.153966	0.387861
YBX1	ENSG00000065978.19	protein_coding	3315.01	0.172081	0.117486	0.387861
BPTF	ENSG00000171634.18	protein_coding	1044.59	0.150965	0.103072	0.387861
TMEM45A	ENSG00000181458.10	protein_coding	311.184	0.31519	0.215275	0.388003
BMP6	ENSG00000153162.9	protein_coding	519.062	0.355263	0.243055	0.389091
CYTOR	ENSG00000222041.11	lncRNA	499.428	0.327267	0.223952	0.389091
TMEM167A	ENSG00000174695.10	protein_coding	1312.36	-0.167269	0.11439	0.389091
SNAPIN	ENSG00000143553.11	protein_coding	146.164	-0.262222	0.179382	0.389091
CD36	ENSG00000135218.19	protein_coding	1804.5	0.289217	0.198109	0.389914
CAVIN2	ENSG00000168497.5	protein_coding	37080.9	0.267609	0.18369	0.391925
NELFCD	ENSG00000101158.15	protein_coding	133.038	0.329579	0.226587	0.392775
HDGFL2	ENSG00000167674.15	protein_coding	216.821	0.295416	0.203122	0.392775
HDAC2	ENSG00000196591.12	protein_coding	272.097	0.258878	0.177957	0.392775
UQCRH	ENSG00000173660.12	protein_coding	1227.8	-0.145009	0.0996537	0.392775
PPP2R5A	ENSG00000066027.12	protein_coding	302.642	0.229999	0.158192	0.392873
AC087473.1	ENSG00000259380.6	lncRNA	513.172	0.454882	0.313411	0.394017
CHAF1A	ENSG00000167670.16	protein_coding	181.149	0.261805	0.180303	0.394017
C4orf3	ENSG00000164096.13	protein_coding	1175.08	-0.143527	0.0988766	0.394017
UBE2G1	ENSG00000132388.12	protein_coding	300.983	-0.195223	0.134716	0.395447
ACTR3B	ENSG00000133627.18	protein_coding	268.998	0.352892	0.24363	0.3957
CLK1	ENSG00000013441.16	protein_coding	350.736	-0.183583	0.126899	0.396546
SAMD3	ENSG00000164483.17	protein_coding	153.866	-0.428281	0.295996	0.396546
SSB	ENSG00000138385.16	protein_coding	342.81	-0.273522	0.189281	0.397524
IPCEF1	ENSG00000074706.13	protein_coding	221.778	0.312536	0.216391	0.397832
ELK4	ENSG00000158711.14	protein_coding	406.299	0.243076	0.168401	0.398243
FKBP5	ENSG00000096060.14	protein_coding	367.832	-0.266273	0.184684	0.399242
RABGEF1	ENSG00000154710.17	protein_coding	219.574	0.296894	0.206002	0.399329
CDC16	ENSG00000130177.16	protein_coding	257.254	-0.28452	0.197479	0.399329
RIOK1	ENSG00000124784.9	protein_coding	151.221	-0.298262	0.20703	0.399329
IVNS1ABP	ENSG00000116679.16	protein_coding	561.792	0.196837	0.136678	0.399465
CD48	ENSG00000117091.10	protein_coding	460.564	-0.279611	0.194255	0.399639
ASXL2	ENSG00000143970.17	protein_coding	280.603	-0.323112	0.224498	0.399639
MAP3K1	ENSG00000095015.6	protein_coding	393.58	0.226041	0.157151	0.400062
MTHFS	ENSG00000136371.10	protein_coding	155.236	-0.302618	0.210473	0.400245
PNMA1	ENSG00000176903.5	protein_coding	428.226	0.3044	0.211931	0.400591
EXOC5	ENSG00000070367.16	protein_coding	359.812	0.21473	0.149531	0.400591
BECN1	ENSG00000126581.13	protein_coding	563.148	-0.162029	0.112821	0.400591
RAD51C	ENSG00000108384.15	protein_coding	99.7953	-0.315013	0.219245	0.400591
SDHB	ENSG00000117118.10	protein_coding	172.732	-0.3204	0.223234	0.400915
GUK1	ENSG00000143774.16	protein_coding	823.918	-0.215566	0.150329	0.401645
ZNF367	ENSG00000165244.7	protein_coding	217.894	0.313692	0.21901	0.401908
ZEB2-AS1	ENSG00000238057.9	lncRNA	60.3146	0.297339	0.207484	0.401908
PRELID1	ENSG00000169230.10	protein_coding	674.267	-0.255413	0.178324	0.401908
IFT57	ENSG00000114446.5	protein_coding	157.871	-0.362523	0.253106	0.401908
CDKN1A	ENSG00000124762.13	protein_coding	645.389	0.317719	0.222	0.402264
AZIN1	ENSG00000155096.14	protein_coding	1335.94	0.154115	0.107829	0.403467
TNPO1	ENSG00000083312.17	protein_coding	357.602	0.261117	0.182825	0.403491
DNAJC21	ENSG00000168724.17	protein_coding	330.96	-0.18223	0.12758	0.403491
TRPM7	ENSG00000092439.16	protein_coding	487.736	-0.279502	0.195672	0.403491
MRPS36	ENSG00000134056.12	protein_coding	78.5167	-0.35822	0.250882	0.403537
KMT5A	ENSG00000183955.13	protein_coding	127.692	0.326551	0.229184	0.404071
WSB1	ENSG00000109046.15	protein_coding	220.098	0.299463	0.210122	0.404071
OS9	ENSG00000135506.16	protein_coding	175.132	0.287658	0.201651	0.404071
DDX42	ENSG00000198231.13	protein_coding	249.795	0.221471	0.155298	0.404071
CFLAR	ENSG00000003402.20	protein_coding	1460.43	-0.141069	0.0989781	0.404071
ACTG1	ENSG00000184009.12	protein_coding	12716.5	-0.154713	0.108562	0.404071
TPD52	ENSG00000076554.15	protein_coding	405.819	-0.281678	0.197467	0.404071
DTX3L	ENSG00000163840.10	protein_coding	306.358	0.228205	0.160382	0.405061
FUNDC1	ENSG00000069509.6	protein_coding	241.553	-0.196274	0.137938	0.405061
TRIQK	ENSG00000205133.12	protein_coding	371.883	0.261905	0.184172	0.405184
FCHO2	ENSG00000157107.14	protein_coding	414.562	-0.240029	0.16876	0.405184
NDUFC1	ENSG00000109390.12	protein_coding	344.129	-0.232212	0.163385	0.40555
PCMTD1	ENSG00000168300.14	protein_coding	3772.53	-0.161952	0.114064	0.406385
CENPT	ENSG00000102901.13	protein_coding	188.048	0.280113	0.197384	0.406671
JUND	ENSG00000130522.6	protein_coding	426.782	0.284804	0.200774	0.406756
TENT5C	ENSG00000183508.5	protein_coding	1676.08	0.214945	0.151619	0.406756
STK40	ENSG00000196182.10	protein_coding	829.629	0.205162	0.144747	0.406756
CTR9	ENSG00000198730.9	protein_coding	443.872	-0.235781	0.166343	0.406756
LRRC37A3	ENSG00000176809.10	protein_coding	214.859	-0.268677	0.189493	0.406756
RBM4	ENSG00000173933.20	protein_coding	222.948	-0.243316	0.171727	0.406895
TUBB1	ENSG00000101162.4	protein_coding	26109.1	0.289858	0.204855	0.40737
C7orf50	ENSG00000146540.15	protein_coding	176.801	0.240129	0.169634	0.40737
UTP18	ENSG00000011260.14	protein_coding	205.068	-0.251255	0.177491	0.40737
NT5C2	ENSG00000076685.18	protein_coding	313.883	-0.30623	0.216393	0.40737
TNRC6B	ENSG00000100354.21	protein_coding	421.597	-0.293619	0.207572	0.407431
LIN7C	ENSG00000148943.12	protein_coding	343.841	0.212731	0.150521	0.407883
HBB	ENSG00000244734.4	protein_coding	14992.4	-0.321573	0.227502	0.407883
UGGT1	ENSG00000136731.13	protein_coding	390.806	0.270593	0.19163	0.408327
NOP53	ENSG00000105373.19	protein_coding	1404.48	-0.25166	0.178189	0.408327
CA13	ENSG00000185015.8	protein_coding	233.141	0.323827	0.22955	0.409109
PSMD14	ENSG00000115233.12	protein_coding	114.228	-0.304653	0.216026	0.409201
G6PD	ENSG00000160211.19	protein_coding	462.183	0.228057	0.162123	0.411427
OIP5-AS1	ENSG00000247556.6	lncRNA	419.087	-0.204127	0.14509	0.411427
ST7	ENSG00000004866.20	protein_coding	208.451	0.291772	0.207633	0.41189
TRIM24	ENSG00000122779.18	protein_coding	382.719	0.256192	0.182269	0.41189
ASAH1	ENSG00000104763.19	protein_coding	2857.14	-0.262386	0.186736	0.41189
SNN	ENSG00000184602.6	protein_coding	2012.04	0.286302	0.203847	0.412121
PDHX	ENSG00000110435.12	protein_coding	156.836	0.221302	0.157668	0.41256
OXR1	ENSG00000164830.18	protein_coding	307.031	-0.242269	0.172677	0.412749
UBE2R2	ENSG00000107341.5	protein_coding	292.952	0.154989	0.110724	0.41499
TXNRD1	ENSG00000198431.16	protein_coding	374.016	0.21296	0.152199	0.415167
MCF2L2	ENSG00000053524.12	protein_coding	199.327	-0.287873	0.20591	0.415821
CAB39	ENSG00000135932.11	protein_coding	681.373	0.135268	0.0967798	0.415852
CA1	ENSG00000133742.13	protein_coding	516.96	0.386004	0.276279	0.416014
ARPC2	ENSG00000163466.16	protein_coding	1691.38	-0.10373	0.074317	0.416824
H4C13	ENSG00000275126.1	protein_coding	147.221	0.38865	0.278686	0.416996
MAPRE2	ENSG00000166974.13	protein_coding	2642.85	0.236666	0.169675	0.416996
PLAAT4	ENSG00000133321.11	protein_coding	194.132	-0.268304	0.192349	0.416996
PPP1R18	ENSG00000146112.12	protein_coding	671.116	0.182415	0.130988	0.417428
DEK	ENSG00000124795.17	protein_coding	2008.35	-0.0966567	0.0693799	0.417428
SNAP23	ENSG00000092531.10	protein_coding	6036.46	-0.243007	0.174524	0.417428
GYPC	ENSG00000136732.16	protein_coding	444.665	-0.312126	0.223976	0.417428
HTATIP2	ENSG00000109854.13	protein_coding	391.744	-0.315351	0.226376	0.417428
RNF10	ENSG00000022840.16	protein_coding	684.988	0.235091	0.168903	0.417592
SLC24A3	ENSG00000185052.12	protein_coding	457.572	0.331424	0.238181	0.41764
XRCC5	ENSG00000079246.16	protein_coding	994.942	-0.182595	0.131363	0.418051
HSPB11	ENSG00000081870.11	protein_coding	221.267	-0.190783	0.137256	0.418051
PSMB3	ENSG00000277791.5	protein_coding	183.536	-0.288895	0.207794	0.418051
AC051619.7	ENSG00000260035.1	lncRNA	32.3111	0.26344	0.189869	0.418901
ARHGAP18	ENSG00000146376.11	protein_coding	2482.4	0.260339	0.187587	0.418901
MYCBP2	ENSG00000005810.18	protein_coding	745.772	0.215832	0.155717	0.418901
DENND4A	ENSG00000174485.15	protein_coding	1283.13	0.187811	0.135372	0.418901
NUDT21	ENSG00000167005.14	protein_coding	407.591	-0.213317	0.153911	0.418901
NUP54	ENSG00000138750.15	protein_coding	225.978	-0.213728	0.154169	0.418901
PPP2R3C	ENSG00000092020.10	protein_coding	353.507	-0.216249	0.155855	0.418901
SNRPB2	ENSG00000125870.11	protein_coding	266.195	-0.304723	0.219837	0.418901
COX8A	ENSG00000176340.4	protein_coding	93.1482	-0.348775	0.251485	0.418901
PPP1CA	ENSG00000172531.15	protein_coding	453.298	-0.20972	0.151363	0.418991
GGNBP2	ENSG00000278311.5	protein_coding	261.963	0.233738	0.168771	0.419079
CHIC2	ENSG00000109220.11	protein_coding	142.35	-0.258098	0.186381	0.419079
TCF4	ENSG00000196628.18	protein_coding	203.803	0.284488	0.205906	0.421141
RNF168	ENSG00000163961.4	protein_coding	1205.23	-0.118831	0.0860575	0.421141
MSANTD3-TMEFF1	ENSG00000251349.3	protein_coding	475.86	-0.244844	0.177275	0.421141
SAFB	ENSG00000160633.13	protein_coding	704.889	-0.274524	0.198768	0.421141
SLC37A1	ENSG00000160190.14	protein_coding	277.423	0.298575	0.216515	0.422137
EGLN2	ENSG00000269858.6	protein_coding	267.068	0.264502	0.19182	0.422137
H2BC8	ENSG00000273802.2	protein_coding	161.735	0.326391	0.236882	0.422279
SNTB1	ENSG00000172164.15	protein_coding	269.26	0.288691	0.209537	0.422279
NINJ1	ENSG00000131669.10	protein_coding	172.278	-0.264674	0.192053	0.422279
INAFM2	ENSG00000259330.3	protein_coding	769.539	0.276633	0.200958	0.42287
FAM133B	ENSG00000234545.8	protein_coding	277.627	0.257725	0.187296	0.42287
GIMAP4	ENSG00000133574.10	protein_coding	1587.44	-0.255463	0.18561	0.42287
UCHL5	ENSG00000116750.13	protein_coding	149.2	-0.241537	0.175913	0.424938
ARL6IP1	ENSG00000170540.15	protein_coding	430.022	0.181161	0.132068	0.42572
CDC42SE1	ENSG00000197622.13	protein_coding	547.429	0.18546	0.135244	0.425805
PRKACA	ENSG00000072062.14	protein_coding	679.077	0.170074	0.12411	0.426289
GNAS	ENSG00000087460.25	protein_coding	11123.9	0.202604	0.148059	0.427568
NEK1	ENSG00000137601.16	protein_coding	849.709	-0.150279	0.109988	0.428943
RPS6KC1	ENSG00000136643.12	protein_coding	255.264	0.195474	0.143118	0.429081
INPP5D	ENSG00000168918.14	protein_coding	470.053	0.304551	0.223043	0.42913
MUC20-OT1	ENSG00000242086.8	lncRNA	130.006	0.325838	0.238798	0.429559
SERPINB1	ENSG00000021355.13	protein_coding	1717.34	0.186152	0.13645	0.429559
FP671120.7	ENSG00000280800.1	lncRNA	185.342	0.314024	0.230283	0.429789
CALM2	ENSG00000143933.18	protein_coding	4151.43	-0.132946	0.0975911	0.430102
UBE2A	ENSG00000077721.16	protein_coding	123.666	-0.267635	0.196379	0.430102
PCMTD2	ENSG00000203880.12	protein_coding	131.01	-0.333256	0.244586	0.430102
HDAC5	ENSG00000108840.15	protein_coding	276.464	0.26387	0.193964	0.430871
NEXN	ENSG00000162614.18	protein_coding	6060.57	0.235714	0.17324	0.430871
UFD1	ENSG00000070010.19	protein_coding	569.748	-0.167384	0.123046	0.430871
ATPAF1	ENSG00000123472.12	protein_coding	220.195	-0.211363	0.155483	0.431358
MRTFA	ENSG00000196588.18	protein_coding	198.184	-0.278381	0.204964	0.432056
CD99L2	ENSG00000102181.21	protein_coding	237.478	0.244267	0.1802	0.433899
ISY1	ENSG00000240682.9	protein_coding	361.29	-0.293154	0.216622	0.435157
FOXN3	ENSG00000053254.15	protein_coding	396.869	-0.292509	0.216447	0.436395
CNPY3	ENSG00000137161.17	protein_coding	298.89	-0.153586	0.113694	0.436567
RAB5A	ENSG00000144566.11	protein_coding	208.494	0.222405	0.164698	0.436703
GNA13	ENSG00000120063.10	protein_coding	921.026	0.149006	0.110436	0.437354
CSNK1G3	ENSG00000151292.17	protein_coding	491.063	0.19545	0.144974	0.437445
RAD21	ENSG00000164754.15	protein_coding	667.871	0.168963	0.125318	0.437445
ABCF1	ENSG00000204574.13	protein_coding	837.541	-0.165072	0.122433	0.437445
PA2G4	ENSG00000170515.14	protein_coding	315.745	-0.269915	0.200339	0.437891
DNAJC16	ENSG00000116138.13	protein_coding	528.968	0.214852	0.159821	0.438837
ERBIN	ENSG00000112851.14	protein_coding	2952.03	-0.160044	0.119051	0.438837
ASAP1	ENSG00000153317.15	protein_coding	2680.93	-0.179423	0.133446	0.438837
NUBPL	ENSG00000151413.17	protein_coding	183.349	-0.192688	0.143242	0.438837
SEPTIN9	ENSG00000184640.18	protein_coding	1328.4	-0.210399	0.156493	0.438837
FLACC1	ENSG00000155749.12	protein_coding	147.145	-0.255426	0.190023	0.438837
PPP1R14A	ENSG00000167641.11	protein_coding	650.21	0.26961	0.200842	0.439803
ETS1	ENSG00000134954.14	protein_coding	900.758	-0.243706	0.181554	0.439803
RHOBTB3	ENSG00000164292.13	protein_coding	1048.94	-0.248848	0.185578	0.440659
DUSP11	ENSG00000144048.10	protein_coding	134.886	-0.252064	0.188104	0.441056
MYCBP	ENSG00000214114.9	protein_coding	255.616	-0.284726	0.212514	0.441056
ZNF267	ENSG00000185947.15	protein_coding	244.602	-0.269823	0.201735	0.442628
CLASP2	ENSG00000163539.17	protein_coding	281.225	0.268934	0.20159	0.444696
VAMP7	ENSG00000124333.16	protein_coding	875.216	0.214552	0.160838	0.444696
BAZ1B	ENSG00000009954.11	protein_coding	428.734	0.198382	0.14869	0.444696
MAP2K1	ENSG00000169032.9	protein_coding	179.201	0.193591	0.145189	0.444919
MORF4L1	ENSG00000185787.15	protein_coding	1724.67	0.124372	0.0933919	0.445988
FAM13B	ENSG00000031003.10	protein_coding	2633.18	-0.16131	0.121162	0.446023
MED29	ENSG00000063322.15	protein_coding	238.101	-0.327424	0.246034	0.446207
ASH2L	ENSG00000129691.16	protein_coding	943.898	-0.196995	0.148132	0.446539
ARID1B	ENSG00000049618.23	protein_coding	414.62	-0.24635	0.185304	0.446539
LINC01151	ENSG00000253819.2	lncRNA	257.797	-0.333734	0.250992	0.446539
EEF1D	ENSG00000104529.17	protein_coding	2353.84	-0.241228	0.181701	0.447753
NNT	ENSG00000112992.18	protein_coding	388.417	0.19811	0.149402	0.448777
H1-10	ENSG00000184897.6	protein_coding	271.342	-0.218582	0.16498	0.449421
CREM	ENSG00000095794.19	protein_coding	246.223	-0.245323	0.18528	0.449837
LINC01011	ENSG00000244041.7	lncRNA	514.558	0.289364	0.218855	0.45102
ARF1	ENSG00000143761.16	protein_coding	2242.33	0.215659	0.163136	0.45102
CRYL1	ENSG00000165475.15	protein_coding	282.824	0.233444	0.176698	0.451388
RNASEK	ENSG00000219200.11	protein_coding	1622.55	-0.194876	0.147572	0.451388
METTL8	ENSG00000123600.19	protein_coding	142.105	-0.251779	0.190658	0.451388
C1orf115	ENSG00000162817.7	protein_coding	574.383	0.297107	0.225117	0.451749
TMED2	ENSG00000086598.11	protein_coding	848.811	-0.146542	0.111171	0.452546
AL355075.4	ENSG00000259001.3	lncRNA	3109.89	-0.181797	0.137902	0.452546
ADSL	ENSG00000239900.12	protein_coding	276.275	-0.254456	0.193155	0.452939
STAG1	ENSG00000118007.13	protein_coding	374.176	-0.217724	0.165319	0.452987
HK1	ENSG00000156515.23	protein_coding	1325.49	0.15906	0.120842	0.45306
RTRAF	ENSG00000087302.9	protein_coding	449.565	-0.207391	0.157547	0.45306
DEPDC5	ENSG00000100150.20	protein_coding	124.996	0.246275	0.187181	0.45326
DEFA3	ENSG00000239839.7	protein_coding	425.125	0.419362	0.319184	0.453614
RNASEH2B	ENSG00000136104.21	protein_coding	250.378	0.232057	0.176584	0.453614
CEP162	ENSG00000135315.12	protein_coding	601.851	0.228961	0.174289	0.453614
XRN2	ENSG00000088930.8	protein_coding	447.282	-0.160171	0.121841	0.453614
SMC5	ENSG00000198887.9	protein_coding	285.904	-0.244021	0.185671	0.453614
DCAF6	ENSG00000143164.15	protein_coding	444.641	0.178355	0.135813	0.453719
BNIP2	ENSG00000140299.12	protein_coding	1843.2	0.152932	0.116617	0.454376
DBNL	ENSG00000136279.20	protein_coding	1054.26	-0.134279	0.102424	0.454376
GNG5	ENSG00000174021.11	protein_coding	643.376	-0.165066	0.125895	0.454376
H2BC3	ENSG00000276410.3	protein_coding	284.183	-0.244795	0.186745	0.454376
MTMR14	ENSG00000163719.19	protein_coding	225.933	-0.257138	0.196005	0.454376
NFATC3	ENSG00000072736.19	protein_coding	362.104	-0.17886	0.136536	0.454704
IL16	ENSG00000172349.17	protein_coding	405.774	-0.221586	0.169174	0.454704
GOLPH3	ENSG00000113384.14	protein_coding	185.205	0.222667	0.170093	0.455036
STAT1	ENSG00000115415.19	protein_coding	779.852	-0.231638	0.177132	0.455896
TOX4	ENSG00000092203.15	protein_coding	171.108	0.267622	0.205071	0.456699
USP1	ENSG00000162607.13	protein_coding	280.769	0.232092	0.177826	0.456699
ARHGAP5	ENSG00000100852.13	protein_coding	386.345	0.202098	0.154771	0.456699
PPP6R1	ENSG00000105063.19	protein_coding	892.713	0.148229	0.1136	0.456699
MLH3	ENSG00000119684.15	protein_coding	4737.17	-0.248304	0.190166	0.456699
FABP4	ENSG00000170323.9	protein_coding	338.22	-0.35106	0.269028	0.456699
NAA16	ENSG00000172766.19	protein_coding	139.423	0.29821	0.228736	0.457337
RAPGEF2	ENSG00000109756.9	protein_coding	227.66	0.253755	0.194687	0.45735
CRKL	ENSG00000099942.13	protein_coding	441.516	0.173764	0.13344	0.457869
CSDE1	ENSG00000009307.16	protein_coding	2953.95	0.130335	0.100166	0.457869
TALDO1	ENSG00000177156.11	protein_coding	1912.5	0.115178	0.0884815	0.457869
HNRNPD	ENSG00000138668.19	protein_coding	1329.36	-0.183797	0.141227	0.457869
H2AC12	ENSG00000274997.1	protein_coding	106.958	-0.451938	0.347187	0.457869
PMVK	ENSG00000163344.6	protein_coding	136.969	-0.24652	0.189628	0.458309
AASDHPPT	ENSG00000149313.11	protein_coding	75.8859	-0.267825	0.206014	0.458309
SLC40A1	ENSG00000138449.10	protein_coding	3139.74	0.242551	0.186766	0.459132
CALCOCO1	ENSG00000012822.16	protein_coding	309.286	0.210995	0.16269	0.460031
DLG1	ENSG00000075711.21	protein_coding	487.744	0.204321	0.157577	0.460031
INPP5A	ENSG00000068383.19	protein_coding	165.205	-0.336913	0.259796	0.460031
RASSF3	ENSG00000153179.13	protein_coding	1168.03	0.222302	0.171616	0.460833
ERGIC2	ENSG00000087502.18	protein_coding	106.9	-0.315923	0.244217	0.461735
CALHM6	ENSG00000188820.13	protein_coding	154.11	-0.346433	0.267764	0.461735
POLK	ENSG00000122008.15	protein_coding	296.922	0.22125	0.171118	0.462007
ARCN1	ENSG00000095139.14	protein_coding	502.188	-0.144135	0.111508	0.462048
IFT88	ENSG00000032742.17	protein_coding	171.125	0.264261	0.204516	0.462181
SNHG29	ENSG00000175061.18	lncRNA	274.334	0.235845	0.182719	0.463048
UBE2V1	ENSG00000244687.11	protein_coding	779.628	-0.152953	0.118552	0.46326
GPATCH1	ENSG00000076650.7	protein_coding	372.878	-0.176383	0.136804	0.463712
APC	ENSG00000134982.17	protein_coding	287.204	0.240557	0.186763	0.464244
NVL	ENSG00000143748.18	protein_coding	321.31	-0.20162	0.156496	0.464244
IDS	ENSG00000010404.18	protein_coding	567.017	0.158995	0.123506	0.464329
DNTTIP2	ENSG00000067334.14	protein_coding	326.55	-0.273995	0.212843	0.464329
STAT5A	ENSG00000126561.16	protein_coding	208.913	0.305082	0.237088	0.464495
MAZ	ENSG00000103495.14	protein_coding	280.231	0.208527	0.162282	0.46521
BDP1	ENSG00000145734.19	protein_coding	603.5	0.131242	0.102125	0.46521
FAM104B	ENSG00000182518.13	protein_coding	104.291	-0.231449	0.180181	0.46521
BST2	ENSG00000130303.13	protein_coding	296.507	-0.315	0.245112	0.46521
MKKS	ENSG00000125863.20	protein_coding	385.818	-0.177929	0.138593	0.465385
KPNA5	ENSG00000196911.11	protein_coding	1281.85	-0.143812	0.112054	0.465465
FAM172A	ENSG00000113391.19	protein_coding	225.613	-0.205587	0.160225	0.465465
FER	ENSG00000151422.13	protein_coding	633.898	0.199989	0.156109	0.46661
LARP4	ENSG00000161813.22	protein_coding	448.939	0.178977	0.139701	0.46661
H1-3	ENSG00000124575.6	protein_coding	109.605	-0.305564	0.238605	0.466733
ANAPC16	ENSG00000166295.9	protein_coding	324.274	-0.236795	0.185013	0.467083
DHX29	ENSG00000067248.10	protein_coding	197.225	0.206435	0.161408	0.467121
GSPT1	ENSG00000103342.13	protein_coding	864.318	0.191839	0.14998	0.467121
NDUFA6	ENSG00000184983.11	protein_coding	4563.13	-0.191906	0.150164	0.467121
FAM214A	ENSG00000047346.12	protein_coding	185.074	-0.195726	0.15313	0.467121
LYST	ENSG00000143669.14	protein_coding	699.362	-0.214442	0.167693	0.467121
CYBA	ENSG00000051523.11	protein_coding	355.488	-0.262031	0.204953	0.467121
GDI1	ENSG00000203879.12	protein_coding	473.398	0.191243	0.149702	0.467263
CSTA	ENSG00000121552.4	protein_coding	107.322	-0.338104	0.264817	0.467617
NDUFB5	ENSG00000136521.13	protein_coding	187.265	-0.258184	0.202304	0.467798
NOLC1	ENSG00000166197.16	protein_coding	195.522	0.248255	0.194609	0.467998
SH3BGRL2	ENSG00000198478.8	protein_coding	8860.33	0.253778	0.199088	0.468023
VPS26A	ENSG00000122958.15	protein_coding	281.198	0.209232	0.164078	0.468023
RBM6	ENSG00000004534.15	protein_coding	377.202	0.195056	0.153007	0.468023
ETV6	ENSG00000139083.11	protein_coding	314.524	0.29671	0.232912	0.46833
TMEM91	ENSG00000142046.15	protein_coding	425.356	0.271435	0.213158	0.46833
COX7B	ENSG00000131174.7	protein_coding	215.724	-0.209849	0.164835	0.46833
C21orf91	ENSG00000154642.11	protein_coding	131.742	-0.270993	0.212831	0.46833
RTN3	ENSG00000133318.14	protein_coding	586.205	0.228236	0.179374	0.468382
MTDH	ENSG00000147649.10	protein_coding	772.675	-0.175193	0.137686	0.468382
RBM26	ENSG00000139746.15	protein_coding	298.259	-0.139918	0.110182	0.47014
NDUFB8	ENSG00000166136.16	protein_coding	280.123	-0.224837	0.177087	0.47014
BMPR2	ENSG00000204217.15	protein_coding	214.878	-0.313106	0.246678	0.470175
CHD1	ENSG00000153922.10	protein_coding	362.406	0.248811	0.196352	0.471406
ARF3	ENSG00000134287.10	protein_coding	1649.05	0.207446	0.16369	0.471406
SNHG12	ENSG00000197989.14	lncRNA	104.779	0.32913	0.260016	0.472166
BAZ1A	ENSG00000198604.11	protein_coding	729.444	0.206783	0.163384	0.472166
TUT7	ENSG00000083223.18	protein_coding	720.082	-0.169158	0.133727	0.472471
SSBP2	ENSG00000145687.16	protein_coding	416.771	0.166728	0.131848	0.472544
REV3L	ENSG00000009413.16	protein_coding	208.846	0.336889	0.267081	0.474401
PLEK	ENSG00000115956.10	protein_coding	3287.41	0.220562	0.174851	0.474401
NSRP1	ENSG00000126653.18	protein_coding	582.129	-0.171671	0.136043	0.474401
RNASET2	ENSG00000026297.15	protein_coding	159.647	-0.232583	0.184458	0.474536
ILKAP	ENSG00000132323.9	protein_coding	180.68	-0.187033	0.148462	0.475185
HSP90AB1	ENSG00000096384.20	protein_coding	1915.83	-0.193407	0.153733	0.47612
SRSF2	ENSG00000161547.16	protein_coding	171.728	-0.228619	0.181725	0.47612
MPZL3	ENSG00000160588.10	protein_coding	145.641	0.288763	0.22973	0.476262
ANXA5	ENSG00000164111.15	protein_coding	546.216	-0.208015	0.165535	0.476262
RSRP1	ENSG00000117616.18	protein_coding	227.653	-0.212854	0.169343	0.476262
NMRK1	ENSG00000106733.21	protein_coding	125.164	-0.250938	0.199554	0.476262
H2AC21	ENSG00000184270.5	protein_coding	349.44	-0.253136	0.201487	0.476262
MAP7D3	ENSG00000129680.16	protein_coding	162.275	0.209949	0.167191	0.476506
BIN2	ENSG00000110934.12	protein_coding	3661.07	0.166208	0.132489	0.477268
HNRNPU	ENSG00000153187.20	protein_coding	3253.4	0.177179	0.141307	0.477323
DDX1	ENSG00000079785.15	protein_coding	228.266	-0.273365	0.21807	0.477323
EMC6	ENSG00000127774.7	protein_coding	91.4783	-0.278307	0.222021	0.477323
ETFA	ENSG00000140374.16	protein_coding	1783.16	-0.207385	0.165583	0.477947
HSPB1	ENSG00000106211.9	protein_coding	875.724	-0.168571	0.134649	0.477999
CYTH4	ENSG00000100055.21	protein_coding	211.134	-0.304504	0.243258	0.477999
HIF1AN	ENSG00000166135.14	protein_coding	206.742	-0.27375	0.218745	0.478009
CSGALNACT2	ENSG00000169826.8	protein_coding	175.967	0.168454	0.134743	0.478805
DICER1	ENSG00000100697.14	protein_coding	384.484	0.23193	0.185733	0.479031
NAP1L4	ENSG00000205531.13	protein_coding	1053.48	-0.139781	0.111946	0.479031
TRAPPC3L	ENSG00000173626.10	protein_coding	820.369	-0.208695	0.167145	0.479031
REST	ENSG00000084093.17	protein_coding	295.41	-0.253467	0.203009	0.479031
MRPL20	ENSG00000242485.6	protein_coding	175.995	-0.284226	0.227676	0.479031
NFAT5	ENSG00000102908.22	protein_coding	629.158	0.176746	0.142085	0.482456
RPAP3	ENSG00000005175.10	protein_coding	380.414	0.168334	0.135459	0.483237
RNF167	ENSG00000108523.16	protein_coding	116.537	0.277005	0.223402	0.483425
TPP1	ENSG00000166340.17	protein_coding	935.367	0.255898	0.206417	0.483425
SWAP70	ENSG00000133789.15	protein_coding	552.415	0.245273	0.197606	0.483425
FBXO7	ENSG00000100225.18	protein_coding	1266.25	0.206421	0.166261	0.483425
BTK	ENSG00000010671.15	protein_coding	677.058	0.142636	0.115013	0.483425
LUC7L3	ENSG00000108848.16	protein_coding	662.225	-0.12138	0.0978084	0.483425
ZNF428	ENSG00000131116.12	protein_coding	129.844	-0.298105	0.240102	0.483425
ROMO1	ENSG00000125995.16	protein_coding	124.038	-0.30588	0.246544	0.483425
NHP2	ENSG00000145912.8	protein_coding	194.205	-0.311786	0.251407	0.483425
STK39	ENSG00000198648.11	protein_coding	1573.97	-0.158212	0.127709	0.483635
AATF	ENSG00000275700.5	protein_coding	482.411	-0.218103	0.176036	0.483635
KIF2A	ENSG00000068796.17	protein_coding	15718.8	0.210118	0.169897	0.484623
ZNF24	ENSG00000172466.16	protein_coding	476.972	0.189842	0.153453	0.484623
SELENOW	ENSG00000178980.15	protein_coding	214.575	-0.201526	0.162916	0.484623
DENND3	ENSG00000105339.10	protein_coding	281.965	0.287534	0.232609	0.484674
SKA3	ENSG00000165480.16	protein_coding	773.726	-0.19385	0.156828	0.484674
NPIPB5	ENSG00000243716.10	protein_coding	179.728	0.318924	0.258127	0.484866
TIMM23	ENSG00000265354.4	protein_coding	112.96	-0.26341	0.213361	0.485413
USP12	ENSG00000152484.14	protein_coding	1228.59	0.12787	0.103621	0.485622
EP300	ENSG00000100393.14	protein_coding	656.167	-0.216001	0.175192	0.486264
DPYD	ENSG00000188641.14	protein_coding	655.358	-0.156732	0.127186	0.486537
GSK3B	ENSG00000082701.15	protein_coding	432.543	-0.239454	0.194558	0.487319
POLI	ENSG00000101751.10	protein_coding	167.499	0.251039	0.204335	0.488558
BRWD1	ENSG00000185658.13	protein_coding	839.808	-0.18558	0.15108	0.488558
DYNLT1	ENSG00000146425.11	protein_coding	95.2872	-0.237534	0.193374	0.488558
RANBP3	ENSG00000031823.14	protein_coding	116.907	0.306503	0.2496	0.488621
KLHDC1	ENSG00000197776.8	protein_coding	358.841	-0.223374	0.182212	0.489918
GOLT1B	ENSG00000111711.10	protein_coding	217.478	-0.262372	0.214038	0.489918
KRTCAP2	ENSG00000163463.11	protein_coding	133.75	-0.26656	0.217602	0.490354
FOXJ3	ENSG00000198815.9	protein_coding	203.96	0.229515	0.18762	0.49141
SEPTIN6	ENSG00000125354.23	protein_coding	1626.47	0.139375	0.11395	0.49141
DYNLT3	ENSG00000165169.11	protein_coding	287.344	0.219399	0.179425	0.49143
PTPRA	ENSG00000132670.20	protein_coding	2116.78	-0.183091	0.149898	0.491629
MMP24OS	ENSG00000126005.17	protein_coding	245.938	-0.187521	0.153491	0.491629
IDH3B	ENSG00000101365.21	protein_coding	123.708	-0.262237	0.214713	0.491629
PDE7A	ENSG00000205268.10	protein_coding	110.17	-0.279415	0.228621	0.491629
LIPA	ENSG00000107798.18	protein_coding	403.262	0.281964	0.231144	0.492454
HMGN3	ENSG00000118418.14	protein_coding	225.967	-0.216583	0.177564	0.492454
DGKA	ENSG00000065357.20	protein_coding	136.945	0.336752	0.276473	0.493458
NUDC	ENSG00000090273.14	protein_coding	814.743	-0.177304	0.145587	0.493458
PSMD9	ENSG00000110801.14	protein_coding	106.069	-0.278128	0.228416	0.493458
CNOT7	ENSG00000198791.12	protein_coding	252.168	-0.242543	0.199309	0.4938
NAGK	ENSG00000124357.13	protein_coding	204.244	0.27209	0.223729	0.49393
CNOT8	ENSG00000155508.13	protein_coding	232.426	-0.20395	0.167679	0.49393
DSTN	ENSG00000125868.16	protein_coding	1433.06	-0.169847	0.139777	0.494094
IRF1	ENSG00000125347.14	protein_coding	515.471	-0.217827	0.179274	0.494094
CCL5	ENSG00000271503.6	protein_coding	51519.3	-0.237982	0.195775	0.494094
PLXDC2	ENSG00000120594.17	protein_coding	904.436	0.223961	0.184455	0.494319
FYTTD1	ENSG00000122068.13	protein_coding	670.554	-0.132678	0.109255	0.494319
AAMP	ENSG00000127837.9	protein_coding	310.614	-0.272385	0.224656	0.495511
RABGAP1	ENSG00000011454.17	protein_coding	601.887	0.23203	0.191447	0.495657
KAT2B	ENSG00000114166.8	protein_coding	464.844	0.203619	0.168167	0.496127
DNAJC19	ENSG00000205981.8	protein_coding	85.5989	-0.285775	0.236007	0.496127
FCF1	ENSG00000119616.11	protein_coding	129.622	-0.273317	0.225803	0.4962
BRCA1	ENSG00000012048.23	protein_coding	144.924	-0.243439	0.201265	0.496684
DNMT1	ENSG00000130816.16	protein_coding	1544.82	-0.20324	0.168133	0.496799
DNAJB1	ENSG00000132002.8	protein_coding	180.248	-0.236738	0.195842	0.496799
DCTN4	ENSG00000132912.12	protein_coding	313.29	0.217449	0.180176	0.497921
MBNL2	ENSG00000139793.18	protein_coding	233.313	0.208764	0.173204	0.498982
NIPSNAP3A	ENSG00000136783.10	protein_coding	117.592	-0.261485	0.217081	0.499359
LYL1	ENSG00000104903.5	protein_coding	530.38	0.13011	0.108075	0.499668
PRKAR2B	ENSG00000005249.13	protein_coding	11457.9	0.247866	0.20611	0.500247
FSTL1	ENSG00000163430.12	protein_coding	588.314	0.263594	0.219744	0.502331
DCUN1D4	ENSG00000109184.15	protein_coding	201.027	0.242521	0.202327	0.502331
PAFAH1B1	ENSG00000007168.13	protein_coding	287.493	0.218507	0.182325	0.502331
PRR34-AS1	ENSG00000241990.5	lncRNA	118.005	-0.251915	0.210143	0.502331
SIRT2	ENSG00000068903.20	protein_coding	118.713	-0.271976	0.226785	0.502331
PDK1	ENSG00000152256.13	protein_coding	369.217	-0.310471	0.259089	0.502331
CAPG	ENSG00000042493.16	protein_coding	105.279	0.33877	0.283058	0.50334
CDC14B	ENSG00000081377.17	protein_coding	852.038	0.249593	0.208944	0.503522
SRGAP2	ENSG00000266028.7	protein_coding	157.212	0.238453	0.199491	0.503522
PPP4R2	ENSG00000163605.15	protein_coding	182.747	0.209919	0.175872	0.503522
NBPF19	ENSG00000271383.7	protein_coding	702.183	0.205215	0.171712	0.503522
TRAPPC6B	ENSG00000182400.15	protein_coding	301.89	0.200773	0.168201	0.503522
SH3BP5	ENSG00000131370.16	protein_coding	440.607	0.181809	0.152065	0.503522
DNAJB6	ENSG00000105993.15	protein_coding	3980.78	-0.178352	0.14928	0.503522
VMP1	ENSG00000062716.13	protein_coding	206.605	-0.179038	0.149922	0.503522
C18orf32	ENSG00000177576.11	protein_coding	335.026	-0.196014	0.164026	0.503522
CAMLG	ENSG00000164615.5	protein_coding	140.187	-0.210844	0.176601	0.503522
RNF213	ENSG00000173821.19	protein_coding	785.073	0.284485	0.238478	0.503829
RAB30	ENSG00000137502.10	protein_coding	372.467	-0.252792	0.212043	0.504208
RNF38	ENSG00000137075.18	protein_coding	310.777	0.194009	0.162874	0.504814
AHSA1	ENSG00000100591.8	protein_coding	281.017	-0.198951	0.167149	0.50532
GRK6	ENSG00000198055.11	protein_coding	342.045	0.181858	0.152958	0.505924
AC078883.1	ENSG00000225205.5	lncRNA	400.832	-0.25806	0.217031	0.505924
CCM2	ENSG00000136280.16	protein_coding	145.981	0.221054	0.186033	0.506236
COX5A	ENSG00000178741.12	protein_coding	231.143	-0.195243	0.16435	0.506236
AP000866.2	ENSG00000250073.3	lncRNA	127.937	-0.287938	0.242549	0.506693
WDR78	ENSG00000152763.17	protein_coding	178.768	-0.210675	0.177527	0.506788
LYAR	ENSG00000145220.14	protein_coding	152.951	-0.259136	0.21866	0.507739
ING5	ENSG00000168395.15	protein_coding	228.747	-0.288054	0.243084	0.507739
COMMD9	ENSG00000110442.12	protein_coding	149.4	-0.329543	0.278166	0.507739
WIPF2	ENSG00000171475.14	protein_coding	287.399	0.237965	0.200939	0.507794
PHACTR1	ENSG00000112137.17	protein_coding	174.453	-0.282524	0.238611	0.507794
ATP6V1B2	ENSG00000147416.11	protein_coding	251.116	0.228863	0.193366	0.50793
PCMT1	ENSG00000120265.17	protein_coding	926.376	-0.168654	0.142546	0.50803
KPNA1	ENSG00000114030.13	protein_coding	317.159	0.185935	0.157399	0.509358
MYO9B	ENSG00000099331.13	protein_coding	624.493	0.242616	0.205481	0.50959
ATP9B	ENSG00000166377.20	protein_coding	375.734	0.179991	0.152521	0.509604
MOB2	ENSG00000182208.14	protein_coding	175.104	-0.300194	0.254368	0.509604
PYCR2	ENSG00000143811.19	protein_coding	713.992	0.215801	0.183065	0.50993
OBI1	ENSG00000152193.8	protein_coding	190.62	-0.164128	0.139216	0.50993
RPLP1	ENSG00000137818.12	protein_coding	7135.76	-0.213092	0.180677	0.50993
RBP7	ENSG00000162444.12	protein_coding	236.418	-0.28464	0.241528	0.509951
GAPDH	ENSG00000111640.15	protein_coding	4205.9	-0.102912	0.0873686	0.5102
ARL13B	ENSG00000169379.16	protein_coding	461.215	-0.211055	0.179246	0.510327
IFT20	ENSG00000109083.13	protein_coding	167.787	-0.287926	0.244895	0.511559
PAWR	ENSG00000177425.11	protein_coding	300.807	0.21058	0.179259	0.511862
CEP63	ENSG00000182923.17	protein_coding	213.072	-0.24667	0.210079	0.511862
CCDC124	ENSG00000007080.11	protein_coding	180.956	-0.262907	0.223764	0.511862
UQCC1	ENSG00000101019.22	protein_coding	81.5328	-0.330017	0.281068	0.511862
PRKCH	ENSG00000027075.15	protein_coding	251.468	0.354922	0.302511	0.511884
RTF2	ENSG00000022277.12	protein_coding	416.811	-0.148844	0.126866	0.511884
IFI16	ENSG00000163565.18	protein_coding	513.917	-0.206293	0.175772	0.511884
TTC27	ENSG00000018699.13	protein_coding	302.521	0.272523	0.232687	0.513108
SESTD1	ENSG00000187231.14	protein_coding	502.834	0.225442	0.192441	0.513108
SETD3	ENSG00000183576.13	protein_coding	657.36	0.101074	0.0863697	0.513456
EAF2	ENSG00000145088.9	protein_coding	125.677	-0.208524	0.178197	0.513456
FAM117A	ENSG00000121104.8	protein_coding	187.117	0.289015	0.247204	0.514104
CARD19	ENSG00000165233.18	protein_coding	919.881	-0.238365	0.204036	0.514606
PARVG	ENSG00000138964.17	protein_coding	222.148	0.287513	0.24644	0.515116
TMPO	ENSG00000120802.13	protein_coding	398.397	-0.193542	0.165853	0.515116
CD84	ENSG00000066294.14	protein_coding	678.736	-0.260519	0.223342	0.515116
SYNRG	ENSG00000275066.5	protein_coding	188.154	0.236986	0.203355	0.51527
NEMF	ENSG00000165525.18	protein_coding	825.079	0.149033	0.12788	0.51527
ACTN4	ENSG00000130402.12	protein_coding	785.46	-0.110262	0.0945993	0.51527
PCM1	ENSG00000078674.17	protein_coding	761.971	0.181188	0.155642	0.515836
IFITM1	ENSG00000185885.16	protein_coding	317.532	-0.243966	0.209571	0.515836
NOMO1	ENSG00000103512.15	protein_coding	513.781	0.333279	0.286643	0.515991
ALAS2	ENSG00000158578.21	protein_coding	362.549	0.332684	0.286057	0.515991
TXNL4B	ENSG00000140830.9	protein_coding	181.326	0.316722	0.272256	0.515991
NFIB	ENSG00000147862.17	protein_coding	341.011	0.241134	0.207469	0.515991
ARHGAP6	ENSG00000047648.23	protein_coding	791.026	0.229744	0.19774	0.515991
PPBP	ENSG00000163736.4	protein_coding	120135	-0.223921	0.192532	0.515991
CIAO2A	ENSG00000166797.11	protein_coding	290.198	-0.229063	0.197151	0.515991
ACAA1	ENSG00000060971.18	protein_coding	291.818	0.195809	0.168681	0.516614
PHF3	ENSG00000118482.11	protein_coding	485.26	0.201699	0.17389	0.517009
HEMGN	ENSG00000136929.13	protein_coding	3771.86	0.165095	0.142454	0.517009
SFPQ	ENSG00000116560.11	protein_coding	780.836	-0.155671	0.134276	0.517009
PITHD1	ENSG00000057757.10	protein_coding	209.673	-0.237622	0.204985	0.517009
APOBEC3G	ENSG00000239713.9	protein_coding	184.383	-0.253812	0.219015	0.517009
SNX12	ENSG00000147164.12	protein_coding	128.602	-0.208838	0.180308	0.51731
ATXN10	ENSG00000130638.17	protein_coding	206.098	0.237836	0.205623	0.518139
RGS2	ENSG00000116741.8	protein_coding	386.333	-0.2369	0.204975	0.518666
AC069368.1	ENSG00000249240.2	protein_coding	184.369	0.228992	0.198362	0.519048
GLUL	ENSG00000135821.18	protein_coding	1110.26	0.166764	0.14443	0.519048
CCNYL1	ENSG00000163249.12	protein_coding	426.867	-0.212075	0.183708	0.519048
HAT1	ENSG00000128708.13	protein_coding	283.155	-0.144365	0.12514	0.519379
ARF4	ENSG00000168374.11	protein_coding	420.323	-0.182172	0.157939	0.519379
TBCK	ENSG00000145348.17	protein_coding	92.2758	0.24887	0.216124	0.52008
HLA-A	ENSG00000206503.13	protein_coding	1647.54	0.204641	0.177911	0.52008
CBL	ENSG00000110395.7	protein_coding	342.517	0.202445	0.175931	0.52008
CD226	ENSG00000150637.9	protein_coding	5785.85	0.195253	0.169586	0.52008
STT3B	ENSG00000163527.10	protein_coding	209.542	-0.219611	0.190917	0.52008
UFM1	ENSG00000120686.12	protein_coding	185.878	-0.232877	0.202307	0.52008
RTL8A	ENSG00000203950.6	protein_coding	103.109	-0.285043	0.247729	0.52008
NCK1	ENSG00000158092.7	protein_coding	118.927	0.258982	0.22525	0.520248
VASP	ENSG00000125753.14	protein_coding	555.624	0.179321	0.156116	0.520939
ZC3H13	ENSG00000123200.16	protein_coding	996.014	0.161585	0.140746	0.520939
DENND1B	ENSG00000213047.13	protein_coding	176.88	-0.273557	0.238254	0.520939
EWSR1	ENSG00000182944.17	protein_coding	561.251	-0.172391	0.150204	0.520982
ZC3H14	ENSG00000100722.20	protein_coding	190.536	0.215594	0.188131	0.521456
HBP1	ENSG00000105856.14	protein_coding	281.176	0.176321	0.153831	0.521456
HSBP1	ENSG00000230989.7	protein_coding	1111.13	0.144081	0.125681	0.521456
EPS15	ENSG00000085832.17	protein_coding	936.849	0.120535	0.105152	0.521456
PSMB9	ENSG00000240065.8	protein_coding	338.392	-0.17577	0.153483	0.521864
PTPN4	ENSG00000088179.9	protein_coding	261.937	-0.247878	0.216538	0.522017
CDC40	ENSG00000168438.15	protein_coding	194.46	0.256739	0.224506	0.522503
CLPX	ENSG00000166855.9	protein_coding	286.807	-0.16136	0.141079	0.522503
N4BP2L2	ENSG00000244754.8	protein_coding	798.551	-0.128036	0.112001	0.522596
LAT	ENSG00000213658.11	protein_coding	441.095	-0.191879	0.168034	0.52343
CARD16	ENSG00000204397.8	protein_coding	839.48	-0.13288	0.116456	0.523924
CAT	ENSG00000121691.7	protein_coding	436.025	-0.193677	0.169905	0.524634
H2AJ	ENSG00000246705.4	protein_coding	880.586	-0.189347	0.166191	0.52488
STYX	ENSG00000198252.12	protein_coding	167.523	-0.175863	0.154432	0.525107
MYBL1	ENSG00000185697.16	protein_coding	129.632	-0.295338	0.25955	0.525615
NEAT1	ENSG00000245532.9	lncRNA	869.343	0.188194	0.165455	0.52575
SDF4	ENSG00000078808.17	protein_coding	155.111	-0.228769	0.201233	0.52601
DNAJC4	ENSG00000110011.13	protein_coding	189.64	0.192483	0.169502	0.526841
CSRP1	ENSG00000159176.14	protein_coding	204.564	0.224831	0.19806	0.52694
[truncated: 2,151 more rows]
