# Supplementary material for: Identifying Candidate Circulating RNA Markers for Coronary Artery Disease by Deep RNA-Sequencing in Human Plasma
Source: Cells. 2022 Oct 11;11(20):3191. doi: 10.3390/cells11203191 (PMC9599983; doi:10.3390/cells11203191)
Supplement: Supplementary file 1 [file cells-11-03191-s001.zip › SuppTableS2_putativelncRNAs.xlsx]

## Sheet: Zoe's putative lncRNAs
ID	Chromosome	Start position	Stop position	Strand	lncRNA class code	Predicted number of exons	Mean Number of Reads Mapping in Controls	Log2 Fold Change in Patients compared with Controls	Log2 Fold Change Standard Error	P-value Adjusted for Multiple Comparisons	Number of samples in which circRNA was not detected
MSTRG.752033.2	chr7	113240035	113240441	-	u	2	7.60875	1.68581	0.399072	0.00165878	12
MSTRG.76602.1	chr10	3408557	3409012	+	u	2	6.80548	2.4356	0.603866	0.00336069	32
MSTRG.37426.1	chr1	104507690	104508063	+	u	2	16.5546	1.76751	0.514332	0.0218406	17
MSTRG.370472.1	chr19	30067804	30069075	-	u	2	8.296	1.68625	0.534086	0.046071	31
MSTRG.488281.3	chr22	11040785	11041146	+	u	2	5.65041	1.73647	0.584011	0.0704538	34
MSTRG.313031.2	chr17	6561269	6561990	-	u	2	4.67754	1.86604	0.659813	0.0965841	41
MSTRG.295421.6	chr16	46400404	46401015	+	u	2	34.0035	1.21055	0.43135	0.10112	7
MSTRG.824407.1	chr9	65812275	65813874	-	u	2	5.59422	1.80664	0.655142	0.111344	41
MSTRG.410007.1	chr2	89835609	89839852	+	u	3	5.6094	1.89517	0.692534	0.115653	42
MSTRG.278825.4	chr15	85839125	85845050	-	u	2	40.2847	0.898037	0.340313	0.141602	12
MSTRG.643761.1	chr5	109932797	110000565	+	u	2	37.7852	1.05423	0.404321	0.149865	6
MSTRG.576392.7	chr4	49096798	49119399	-	u	3	10.8742	1.66391	0.662248	0.178254	36
MSTRG.550287.1	chr3	167017231	167017949	-	u	2	13.0313	1.44341	0.583429	0.189613	27
MSTRG.465680.1	chr20	37418364	37419478	-	u	2	4.54541	1.41909	0.573701	0.189756	40
MSTRG.288544.1	chr16	13797629	13854433	+	u	2	5.25816	1.72582	0.704871	0.198246	44
MSTRG.576392.4	chr4	49092712	49097467	-	u	2	9.41717	1.13791	0.479488	0.221803	16
MSTRG.863532.1	chrX	65051940	65113912	-	u	4	55.4643	-0.672799	0.287128	0.232611	9
MSTRG.134056.7	chr11	58770336	58786090	+	u	3	187.779	0.926148	0.396958	0.23687	12
MSTRG.117055.2	chr11	359591	360395	+	u	2	10.087	1.56707	0.677406	0.243536	37
MSTRG.464220.1	chr20	31052036	31063360	-	u	2	3.08551	1.39975	0.60637	0.245043	43
MSTRG.369322.2	chr19	24179482	24182133	+	u	2	29.368	1.49387	0.650503	0.249434	33
MSTRG.191792.1	chr12	102523649	102691202	+	u	3	25.2609	0.990121	0.433042	0.252982	8
MSTRG.576381.1	chr4	51810816	51812555	+	u	2	27.0564	1.0892	0.477376	0.255051	17
MSTRG.75582.1	chr1	248945682	248946410	+	u	2	2.94735	1.40417	0.618384	0.258914	44
MSTRG.87311.1	chr10	38918587	38919980	+	u	2	38.7517	0.961029	0.424586	0.262343	6
MSTRG.137102.5	chr11	65416541	65421941	+	u	3	17.4836	-1.11525	0.492795	0.262466	29
MSTRG.382329.2	chr2	3530264	3531182	+	u	2	14.5995	1.35294	0.599321	0.264953	29
MSTRG.479449.2	chr21	9247086	9249134	+	u	2	8.35072	1.42221	0.657051	0.301059	38
MSTRG.497048.11	chr22	39066228	39069881	+	u	2	34.3487	-0.953244	0.440351	0.301059	19
MSTRG.764372.3	chr7	155329532	155330234	-	u	2	4.36265	1.36606	0.632181	0.302262	43
MSTRG.614871.5	chr5	1557756	1564237	-	u	2	3.58708	1.11599	0.519711	0.307559	42
MSTRG.628102.10	chr5	49659440	49660440	+	u	3	7.53226	1.42061	0.678104	0.329759	40
MSTRG.254033.2	chr14	95927898	95928674	-	u	2	5.33255	1.27936	0.614769	0.335878	36
MSTRG.576376.1	chr4	49709272	49711928	+	u	2	10.5149	1.26834	0.609603	0.335936	33
MSTRG.87509.1	chr10	39522547	39530894	+	u	2	35.0908	1.1079	0.53919	0.347135	20
MSTRG.87707.1	chr10	41900031	41913965	-	u	2	7.75821	1.33503	0.651581	0.349952	34
MSTRG.87706.1	chr10	41898708	41909728	+	u	2	12.1903	1.05045	0.514481	0.352533	24
MSTRG.410598.1	chr2	91498091	91501008	-	u	2	20.226	1.05352	0.5167	0.353778	22
MSTRG.2571.1	chr1	2859049	2859594	+	u	2	10.0336	1.2013	0.602831	0.374321	30
MSTRG.315215.1	chr17	12265157	12364411	+	u	2	13.5921	0.90849	0.461203	0.385036	14
MSTRG.464227.1	chr20	31064744	31186691	-	u	3	86.706	0.707916	0.359705	0.385728	2
MSTRG.319227.1	chr17	26101531	26299944	-	u	2	10.6359	1.00044	0.514579	0.397557	20
MSTRG.479352.1	chr21	8228201	8233517	-	u	2	719.557	0.659411	0.345043	0.412296	1
MSTRG.82992.6	chr10	22853163	22871909	+	u	2	111.136	-0.852309	0.446644	0.413727	16
MSTRG.689927.1	chr6	71603649	71611701	-	u	2	1.74414	1.10122	0.578222	0.414693	43
MSTRG.369700.1	chr19	28987147	28989246	-	u	3	5.2352	1.19848	0.64703	0.436893	41
MSTRG.477600.1	chr21	10709167	10711067	-	u	2	13.6829	0.916661	0.499065	0.443258	21
MSTRG.295040.1	chr16	34582115	34587804	+	u	2	70.2436	0.791484	0.431421	0.444524	8
MSTRG.116326.3	chr10	128464369	128464747	-	u	2	67.8152	0.919426	0.503608	0.448587	11
MSTRG.556587.1	chr3	187312151	187313202	-	u	2	14.3114	0.957899	0.531294	0.457471	24
MSTRG.363648.1	chr19	4618479	4619684	-	u	2	23.3179	1.00787	0.560565	0.459752	24
MSTRG.41983.1	chr1	143254405	143255804	-	u	2	24.796	0.932901	0.520297	0.461838	19
MSTRG.202188.1	chr12	132376544	132378094	+	u	2	20.6558	0.897655	0.500818	0.462235	19
MSTRG.41957.1	chr1	125179659	125183250	+	u	2	129.211	0.675126	0.377976	0.465237	3
MSTRG.138820.2	chr11	69917408	69918264	-	u	3	5.63333	1.21017	0.680205	0.469106	41
MSTRG.409894.28	chr2	87412133	87423880	+	u	3	39.0868	1.19956	0.682502	0.480416	33
MSTRG.319313.1	chr17	26881218	26885980	+	u	2	22.5796	1.13789	0.64771	0.480629	29
MSTRG.627941.6	chr5	49601227	49602716	+	u	3	4.65505	0.958836	0.548774	0.485675	30
MSTRG.538728.1	chr3	128585007	128618781	-	u	2	12.4586	0.880295	0.513738	0.502525	31
MSTRG.126177.2	chr11	33893835	33914213	+	u	3	148.54	0.527329	0.307957	0.502877	4
MSTRG.295385.1	chr16	38267150	38276268	+	u	2	37.9515	0.707526	0.420118	0.515826	9
MSTRG.628101.5	chr5	49658480	49659953	-	u	2	7.07384	1.00749	0.601075	0.518384	31
MSTRG.614465.4	chr4	190122824	190123121	+	u	2	5.04275	0.886879	0.5295	0.51901	29
MSTRG.19438.22	chr1	47197301	47212027	-	u	2	25.6934	1.03366	0.617553	0.519287	35
MSTRG.74965.1	chr1	247902025	247905548	-	u	2	48.3595	-1.06096	0.635765	0.521217	31
MSTRG.8727.16	chr1	10003	10484	+	u	3	11.4798	-1.0729	0.653191	0.53249	33
MSTRG.576392.15	chr4	49103184	49110555	-	u	2	8.96351	1.16281	0.713233	0.539081	37
MSTRG.161642.1	chr12	6182525	6189298	+	u	2	7.80578	-0.993642	0.610269	0.540641	41
MSTRG.361667.3	chr18	79546363	79546883	-	u	2	9.54085	1.19433	0.735993	0.54332	43
MSTRG.87518.1	chr10	40556778	41258350	+	u	2	67.6025	0.705606	0.437376	0.548592	5
MSTRG.319311.1	chr17	26879103	26938668	+	u	3	22.539	0.715599	0.445907	0.551906	12
MSTRG.41973.1	chr1	143209051	143255209	-	u	2	39.958	0.714659	0.45029	0.558118	9
MSTRG.501759.7	chr22	50807882	50808284	-	u	2	9.94139	0.849446	0.536376	0.559233	30
MSTRG.576398.1	chr4	49110575	49110992	-	u	2	24.855	0.88677	0.562209	0.562092	24
MSTRG.19438.21	chr1	47197290	47212027	-	u	4	68.5697	-0.905593	0.576317	0.564018	27
MSTRG.584725.2	chr4	83085968	83089855	-	u	2	107.622	0.39726	0.257562	0.576898	1
MSTRG.759651.4	chr7	139036073	139036950	+	u	3	25.3261	-1.02944	0.668921	0.578269	38
MSTRG.560241.1	chr3	196461417	196463279	-	u	2	15.8122	0.613978	0.402397	0.58447	18
MSTRG.284798.11	chr15	101980932	101981189	-	u	2	3.17653	0.771616	0.508777	0.588722	32
MSTRG.527493.1	chr3	91543645	91549357	-	u	2	304.975	0.519242	0.343084	0.590037	1
MSTRG.410010.2	chr2	89838612	89840591	+	u	2	15.2286	0.94854	0.6304	0.59515	29
MSTRG.116326.2	chr10	128464369	128464747	-	u	2	24.0504	1.08285	0.727172	0.600323	35
MSTRG.576334.2	chr4	49322970	49330164	-	u	2	6.35079	0.958407	0.643213	0.600323	38
MSTRG.153924.2	chr11	117977396	117978284	-	u	2	49.5796	-0.683391	0.4632	0.606505	18
MSTRG.41982.1	chr1	143252835	143256547	-	u	2	110.847	0.621372	0.42298	0.607969	3
MSTRG.614686.1	chr5	1191600	1192255	+	u	2	12.5709	0.87026	0.596155	0.610686	29
MSTRG.41956.1	chr1	125179652	125183250	-	u	2	108.179	0.588621	0.405267	0.613933	3
MSTRG.490136.1	chr22	19726166	19727912	+	u	2	3.13344	0.81835	0.566023	0.617287	42
MSTRG.233305.1	chr14	24696163	24697586	+	u	3	21.2456	0.720723	0.505752	0.625786	17
MSTRG.588398.53	chr4	98784686	98862667	-	u	3	21.1153	-0.930859	0.655946	0.62771	38
MSTRG.327549.1	chr17	50793187	50795294	+	u	2	128.72	-0.67081	0.475591	0.631302	18
MSTRG.75581.3	chr1	248945682	248946422	-	u	3	2.89116	0.808792	0.576529	0.634608	40
MSTRG.270071.2	chr15	59689637	59691430	+	u	2	8.14635	0.576238	0.410758	0.634608	22
MSTRG.319311.2	chr17	26936529	26940873	+	u	2	19.0885	0.762677	0.546181	0.638581	21
MSTRG.302327.2	chr16	64662344	64662821	-	u	2	4.52357	0.882788	0.63347	0.639553	36
MSTRG.410210.3	chr2	90288353	90293755	+	u	5	10.9064	1.06829	0.774659	0.645538	40
MSTRG.614464.26	chr4	190122713	190123121	-	u	2	4.72863	0.7015	0.508819	0.645824	33
MSTRG.849044.2	chrX	527281	527668	-	u	2	9.42247	0.773095	0.561303	0.646225	25
MSTRG.789465.1	chr8	77981759	77991960	+	u	2	125.254	-0.52233	0.37966	0.647016	9
MSTRG.38450.8	chr1	110675084	110692971	+	u	2	12.1054	-0.933268	0.680334	0.648579	44
MSTRG.464221.1	chr20	31052090	31063401	+	u	2	4.30436	0.888648	0.648286	0.649009	41
MSTRG.38407.2	chr1	110773719	110774071	+	u	2	7.04851	0.855221	0.6288	0.653975	37
MSTRG.709335.6	chr6	136938651	136953619	+	u	3	21.1781	-0.889622	0.654052	0.653975	40
MSTRG.871412.1	chrX	109240897	109241445	-	u	2	7.01956	0.874232	0.643286	0.65432	39
MSTRG.295104.2	chr16	34592603	34595855	-	u	2	21.9066	0.616877	0.454337	0.654561	12
MSTRG.84544.5	chr10	29781726	29784525	-	u	4	13.6747	1.00202	0.749313	0.662838	43
MSTRG.126177.6	chr11	33899568	33911330	+	u	3	11.924	0.820084	0.616611	0.665633	38
MSTRG.41955.1	chr1	125179143	125179465	+	u	2	7.29291	0.853154	0.645809	0.667816	37
MSTRG.414262.2	chr2	105641541	105672184	+	u	3	14.1053	-0.633259	0.480116	0.668413	32
MSTRG.709335.13	chr6	136938654	136953619	+	u	3	32.8152	-0.765967	0.58386	0.67194	31
MSTRG.101243.14	chr10	91109662	91113248	-	u	2	108.376	-0.384094	0.293691	0.673448	6
MSTRG.17950.3	chr1	44198202	44201681	-	u	2	24.1386	0.63868	0.488571	0.673732	25
MSTRG.41958.1	chr1	125180087	125182173	-	u	2	11.8965	0.589569	0.451605	0.67466	12
MSTRG.295421.4	chr16	46387962	46399980	+	u	3	3.95521	0.742914	0.578927	0.683051	32
MSTRG.114320.1	chr10	127797410	127797953	-	u	2	4.2873	0.809678	0.643389	0.69283	43
MSTRG.675974.5	chr6	24720046	24720925	-	u	2	31.7421	-0.762906	0.60706	0.693806	34
MSTRG.2571.2	chr1	2859186	2859594	+	u	2	9.67344	0.60606	0.490431	0.702611	17
MSTRG.849256.4	chrX	1571060	1585838	+	u	3	14.6601	-0.796445	0.649547	0.707648	41
MSTRG.181694.48	chr12	68538431	68539013	-	u	2	11.4184	-0.795201	0.652478	0.708401	43
MSTRG.478211.1	chr21	7949847	7956731	-	u	2	13.2416	0.691897	0.567376	0.708401	26
MSTRG.849076.1	chrX	622079	623447	+	u	2	15.2749	0.937322	0.768301	0.708401	42
MSTRG.774207.7	chr8	23117551	23121370	+	u	2	6.90512	-0.760911	0.627816	0.710614	42
MSTRG.848852.3	chrX	481439	482146	+	u	2	10.7497	0.774548	0.640721	0.711723	33
MSTRG.718606.1	chr6	169314998	169316060	-	u	2	10.5088	0.771547	0.640425	0.713348	36
MSTRG.823327.1	chr9	40597990	40599461	+	u	2	8.11615	0.60074	0.502556	0.716413	26
MSTRG.464225.1	chr20	31057932	31069785	+	u	3	52.0615	0.47859	0.40316	0.71893	3
MSTRG.488760.2	chr22	11265994	11266757	+	u	2	10.0879	0.808429	0.680285	0.71893	39
MSTRG.713688.1	chr6	152726820	152732900	-	u	2	10.1797	-0.736936	0.621819	0.719593	41
MSTRG.410171.1	chr2	90395427	90402311	+	u	2	24.034	0.619799	0.524708	0.720471	21
MSTRG.510561.1	chr3	33446572	33453436	+	u	2	22.8627	0.665831	0.563673	0.720471	29
MSTRG.295040.2	chr16	34583533	34588408	+	u	3	160.462	0.429932	0.364413	0.721094	3
MSTRG.702081.1	chr6	111654019	111655603	-	u	2	7.68387	-0.777752	0.661041	0.722797	42
MSTRG.49230.4	chr1	164146955	164335878	-	u	5	7.82499	-0.781044	0.666631	0.724184	44
MSTRG.464229.1	chr20	31070873	31101891	+	u	2	5.01653	0.806002	0.687771	0.724184	42
MSTRG.527505.1	chr3	93470362	93470792	+	u	2	23.3827	0.540783	0.46292	0.725677	11
MSTRG.101243.12	chr10	91104391	91113248	-	u	2	15.7504	-0.793754	0.682216	0.727355	41
MSTRG.295041.1	chr16	34583274	34587696	-	u	2	10.4021	0.680064	0.585085	0.727416	29
MSTRG.381964.1	chr2	1779245	1780736	+	u	2	9.32197	0.746803	0.642782	0.727512	35
MSTRG.294828.4	chr16	33337492	33338830	-	u	2	4.12215	0.765673	0.660783	0.728001	43
MSTRG.576377.1	chr4	49771906	49850032	-	u	2	31.4875	0.513858	0.443615	0.728001	7
MSTRG.538728.2	chr3	128589214	128592286	-	u	2	16.2163	0.384822	0.334948	0.730994	19
MSTRG.852199.1	chrX	15854932	15855825	+	u	2	26.5195	-0.468386	0.408631	0.731919	20
MSTRG.110047.1	chr10	111180145	111185202	-	u	3	10.484	0.763065	0.669574	0.734716	38
MSTRG.295389.1	chr16	36162155	36222147	+	u	2	6.23768	0.615872	0.545268	0.739049	29
MSTRG.504486.1	chr3	12448408	12448759	+	u	2	11.9179	0.57441	0.510727	0.741136	22
MSTRG.284579.2	chr15	101255360	101255781	-	u	2	72.6493	-0.796607	0.708514	0.741211	32
MSTRG.41973.3	chr1	143254620	143256057	-	u	2	58.2331	0.463493	0.414166	0.743451	4
MSTRG.463652.1	chr20	26605713	26607131	+	u	2	7.35725	0.754705	0.676966	0.746139	41
MSTRG.58484.15	chr1	192106186	192156903	+	u	5	363.739	-0.442081	0.40079	0.75104	8
MSTRG.576392.11	chr4	49097950	49098570	-	u	2	7.20712	0.685821	0.621834	0.75104	35
MSTRG.294828.3	chr16	33337263	33339503	-	u	3	10.0442	0.568937	0.51701	0.751644	24
MSTRG.182657.5	chr12	72678064	72703237	+	u	2	13.3134	-0.731748	0.666377	0.752601	42
MSTRG.3349.2	chr1	4603630	4622250	+	u	4	28.3205	-0.493894	0.456935	0.757724	25
MSTRG.294828.2	chr16	33336460	33340033	-	u	2	6.76054	0.605681	0.563194	0.760421	28
MSTRG.719689.16	chr7	525930	529237	+	u	2	12.1909	0.55271	0.514684	0.760821	32
MSTRG.464228.1	chr20	31066301	31157901	-	u	2	4.69246	0.561639	0.529494	0.766726	30
MSTRG.576396.1	chr4	49102959	49115084	+	u	3	7.73911	0.580177	0.552575	0.769495	26
MSTRG.628102.1	chr5	49656493	49667358	+	u	5	6.47278	0.605562	0.577645	0.770062	31
MSTRG.75582.4	chr1	248945756	248946308	+	u	2	10.9568	0.658646	0.632673	0.77199	32
MSTRG.527492.1	chr3	91542735	91551249	-	u	2	33.1264	0.48801	0.468999	0.772272	12
MSTRG.263828.5	chr15	36422013	36428432	-	u	3	56.2415	0.838899	0.813189	0.775216	42
MSTRG.337016.1	chr17	79805964	79812477	+	u	3	14.8037	-0.612268	0.595044	0.776171	35
MSTRG.634293.2	chr5	71139862	71142725	-	u	2	10.3261	-0.554915	0.551152	0.783006	31
MSTRG.252636.2	chr14	92750372	92751240	+	u	2	478.359	-0.247451	0.246729	0.784864	0
MSTRG.527504.2	chr3	93470420	93470801	-	u	2	13.8239	0.660084	0.658816	0.785345	35
MSTRG.627942.1	chr5	49600437	49600890	-	u	2	5.81975	-0.68183	0.681032	0.785594	40
MSTRG.370918.5	chr19	32205992	32219860	+	u	3	226.922	-0.527177	0.526977	0.785706	19
MSTRG.114788.6	chr10	129035328	129036864	-	u	3	100.4	-0.400445	0.403927	0.788045	12
MSTRG.361984.2	chr19	394172	396026	+	u	2	8.72298	0.637571	0.644544	0.788824	35
MSTRG.319229.1	chr17	26435011	26604339	-	u	2	28.0136	0.462641	0.469307	0.789622	11
MSTRG.87701.3	chr10	41883369	41899337	+	u	2	3.55959	-0.602215	0.611473	0.790245	39
MSTRG.464231.1	chr20	31075282	31075947	-	u	2	155.154	0.502989	0.513046	0.791962	9
MSTRG.84544.4	chr10	29781726	29784525	-	u	4	53.3167	0.471794	0.483563	0.793566	19
MSTRG.463652.2	chr20	26605737	26607131	+	u	2	20.1507	0.64449	0.661657	0.794034	33
MSTRG.559629.1	chr3	195065517	195066937	-	u	2	4.45832	-0.612688	0.631985	0.796044	43
MSTRG.863529.7	chrX	65035188	65113899	+	u	4	31.4293	0.586502	0.609207	0.798816	31
MSTRG.614562.2	chr5	553037	553617	-	u	2	28.5064	0.485028	0.504331	0.799493	13
MSTRG.489595.1	chr22	11697679	11816714	+	u	2	8.74754	0.567645	0.594821	0.802397	30
MSTRG.76218.1	chr10	3052034	3052616	+	u	2	43.007	-0.643066	0.680901	0.805776	35
MSTRG.295421.3	chr16	46387800	46390471	+	u	2	659.905	0.340745	0.36074	0.805776	2
MSTRG.614037.3	chr4	189233873	189234552	-	u	2	57.8555	0.588655	0.62703	0.806709	21
MSTRG.247189.1	chr14	74394673	74398421	+	u	2	12.462	-0.622093	0.664231	0.807602	42
MSTRG.720004.12	chr7	1280410	1280813	+	u	2	8.26234	0.644001	0.690185	0.808023	42
MSTRG.358638.1	chr18	71064154	71092047	-	u	2	24.8433	0.321238	0.344756	0.808362	0
MSTRG.527494.1	chr3	91549677	91552787	+	u	2	11.0146	0.637694	0.686449	0.809078	39
MSTRG.87694.1	chr10	41859676	41889253	+	u	2	19.0546	0.409406	0.444483	0.811104	9
MSTRG.114788.5	chr10	129035258	129036864	-	u	3	16.9406	0.657621	0.714079	0.811104	43
MSTRG.319220.1	chr17	25483088	26076056	-	u	2	13.7432	0.561213	0.614826	0.8131	28
MSTRG.246819.6	chr14	65107540	65119053	+	u	4	9.64519	0.505053	0.556544	0.815715	37
MSTRG.627941.1	chr5	49599400	49603131	+	u	3	29.8747	0.46425	0.514303	0.817011	18
MSTRG.295421.5	chr16	46389636	46400403	+	u	4	293.591	0.332659	0.369083	0.817522	2
MSTRG.740169.1	chr7	70887943	70888428	+	u	2	4.24217	0.607782	0.674804	0.817854	44
MSTRG.463650.1	chr20	28495666	28498864	+	u	2	24.3231	0.428841	0.476472	0.817973	12
MSTRG.74727.3	chr1	247363146	247363578	-	u	2	27.2656	0.504913	0.562791	0.818731	25
MSTRG.881116.1	chrX	153389315	153391609	-	u	3	11.3092	0.432795	0.483184	0.819224	22
MSTRG.849320.1	chrX	1657738	1660835	+	u	2	44.2711	0.425729	0.478739	0.822576	23
MSTRG.501759.11	chr22	50807901	50808468	-	u	2	12.6646	-0.634834	0.714096	0.822664	39
MSTRG.588398.3	chr4	98770228	98862667	-	u	3	9.31968	0.364958	0.412464	0.823794	30
MSTRG.289161.2	chr16	16449286	16449533	+	u	2	3.51513	0.594791	0.675215	0.824462	42
MSTRG.172176.1	chr12	34829628	34831150	-	u	2	100.657	0.339352	0.392164	0.830339	2
MSTRG.319219.1	chr17	24750623	25311644	-	u	2	5.33136	0.411554	0.476732	0.831166	22
MSTRG.114788.2	chr10	129024439	129036864	-	u	3	22.6002	-0.479785	0.557404	0.832025	32
MSTRG.814139.2	chr9	10696577	10709347	+	u	2	31.684	-0.355405	0.415723	0.833552	19
MSTRG.627944.1	chr5	50134615	50137200	+	u	2	9.70718	0.54484	0.638577	0.834007	34
MSTRG.38446.8	chr1	110659506	110672212	-	u	4	43.9325	0.412882	0.48721	0.835406	21
MSTRG.501760.1	chr22	50807893	50808467	+	u	2	7.45906	-0.430436	0.510438	0.836092	26
MSTRG.582509.13	chr4	74038873	74042870	+	u	2	48.662	0.456021	0.541524	0.836531	26
MSTRG.87692.6	chr10	41859891	41861957	-	u	2	26.2583	0.360804	0.430905	0.838126	4
MSTRG.409998.4	chr2	89829159	89832512	+	u	3	3.32357	0.524725	0.627141	0.838393	41
MSTRG.712262.3	chr6	148617693	148646513	+	u	4	37.283	-0.629794	0.767519	0.843845	39
MSTRG.156144.1	chr11	124075991	124081435	+	u	3	8.69385	-0.464857	0.56778	0.84411	40
MSTRG.74965.2	chr1	247902025	247905548	-	u	2	41.3555	-0.472643	0.57834	0.844727	30
MSTRG.409869.1	chr2	88659002	88687833	+	u	3	78.7802	0.399974	0.491932	0.846134	22
MSTRG.594976.45	chr4	119637440	119657311	-	u	3	21.8392	-0.427494	0.530501	0.848124	30
MSTRG.295039.1	chr16	34581239	34582108	+	u	2	39.4586	0.356283	0.444368	0.84918	6
MSTRG.712264.1	chr6	148618495	148624393	+	u	2	9.06471	0.346623	0.437818	0.85226	26
MSTRG.84544.3	chr10	29781563	29784763	-	u	3	39.7006	-0.57538	0.728938	0.852673	40
MSTRG.160009.7	chr12	10026	10601	+	u	3	27.3462	-0.37273	0.482174	0.85698	12
MSTRG.834395.3	chr9	96418815	96419484	-	u	2	7.55385	-0.413062	0.53644	0.857619	36
MSTRG.409894.35	chr2	87414397	87417233	+	u	2	15.198	0.501117	0.65382	0.857762	31
MSTRG.58484.22	chr1	192106205	192157884	+	u	4	148.331	-0.465531	0.610217	0.858268	26
MSTRG.294828.1	chr16	33336083	33339503	-	u	3	5.80869	0.390831	0.51654	0.860124	26
MSTRG.370918.7	chr19	32206022	32217874	+	u	2	568.683	-0.32482	0.428325	0.860124	9
MSTRG.470158.1	chr20	47894704	47896051	+	u	2	12.5856	0.456357	0.602211	0.860124	30
MSTRG.202989.1	chr13	20392432	20393540	-	u	2	9.77498	0.462535	0.613796	0.860947	36
MSTRG.416233.1	chr2	113317882	113320863	-	u	2	11.5927	-0.459843	0.610153	0.860947	29
MSTRG.762493.5	chr7	143380618	143381104	-	u	2	54.1643	-0.255234	0.341194	0.861911	11
MSTRG.594976.43	chr4	119636722	119657311	-	u	2	11.5938	0.511361	0.68751	0.862967	42
MSTRG.43559.1	chr1	144152773	144153192	+	u	2	12.1956	0.449627	0.605207	0.863045	31
MSTRG.410598.8	chr2	91498523	91500396	-	u	4	4.61389	0.382322	0.520163	0.864456	33
MSTRG.75581.18	chr1	248945697	248946422	-	u	4	4.42223	0.437688	0.596521	0.864789	37
MSTRG.628102.9	chr5	49658270	49659972	+	u	3	8.23203	0.430495	0.586432	0.864789	31
MSTRG.295104.1	chr16	34592409	34671856	-	u	3	7.24578	0.396473	0.544758	0.865513	27
MSTRG.319228.1	chr17	26140850	26494741	-	u	2	21.2951	0.411686	0.568397	0.865745	22
MSTRG.370918.1	chr19	32205971	32219860	+	u	3	22.2646	0.543537	0.760652	0.868469	44
MSTRG.848056.1	chr9	136174077	136175188	-	u	3	13.2603	0.342709	0.483684	0.869972	13
MSTRG.772408.1	chr8	20510045	20511413	+	u	2	11.6949	0.503292	0.713263	0.870068	44
MSTRG.87693.3	chr10	41885471	41907571	+	u	3	4.46893	0.465044	0.674805	0.875102	42
MSTRG.263828.11	chr15	36423447	36428432	-	u	3	63.7371	-0.55926	0.825765	0.878641	42
MSTRG.441504.1	chr2	201105704	201115878	-	u	5	4.37302	-0.407343	0.610093	0.879987	43
MSTRG.484950.2	chr21	39103933	39104480	+	u	2	11.7775	0.498859	0.747661	0.880208	40
MSTRG.373333.1	chr19	36279661	36282414	-	u	2	18.7315	0.314601	0.476783	0.88198	13
MSTRG.594976.49	chr4	119640542	119657311	-	u	2	10.1056	0.455491	0.690007	0.88198	43
MSTRG.852308.1	chrX	16082632	16119664	-	u	5	21.9597	0.417785	0.641335	0.883824	35
MSTRG.398493.51	chr2	49601759	49699459	+	u	8	13.5525	0.396282	0.609	0.883833	38
MSTRG.278825.10	chr15	85843454	85845050	-	u	3	9.55402	-0.375415	0.577756	0.884202	38
MSTRG.443039.1	chr2	206172354	206173153	+	u	2	14.0258	0.294995	0.457069	0.884594	16
MSTRG.634249.1	chr5	69686963	69693078	-	u	2	9.42559	0.411929	0.644445	0.885581	40
MSTRG.479352.46	chr21	8455755	8457726	-	u	2	666.166	0.239044	0.37777	0.886988	4
MSTRG.559040.2	chr3	194324551	194325746	-	u	2	9.43609	-0.39007	0.621581	0.887959	36
MSTRG.492203.2	chr22	27666546	27669512	-	u	2	8.9748	-0.375273	0.607558	0.890258	42
MSTRG.405701.2	chr2	73702073	73702938	+	u	2	12.2653	-0.314342	0.513734	0.891611	32
MSTRG.882532.2	chrX	155415572	155429779	-	u	3	13.8887	-0.320131	0.525684	0.891778	30
MSTRG.141133.2	chr11	76598947	76602540	-	u	4	9.92282	0.419955	0.693548	0.893012	44
MSTRG.406258.3	chr2	75239173	75346811	+	u	2	43.7411	-0.25574	0.43128	0.89642	17
MSTRG.58484.8	chr1	192106159	192139958	+	u	4	88.0933	-0.253637	0.433033	0.898033	15
MSTRG.576402.1	chr4	49122939	49153796	+	u	3	8.90401	0.336085	0.577162	0.898838	27
MSTRG.58485.1	chr1	192106232	192123221	-	u	3	5.98388	-0.336979	0.583472	0.899975	39
MSTRG.278825.9	chr15	85843344	85845050	-	u	2	14.9708	0.385442	0.667644	0.900096	41
MSTRG.204576.1	chr13	24355688	24357361	-	u	3	7.586	0.321205	0.55669	0.900213	36
MSTRG.463958.1	chr20	30498066	30503173	+	u	2	8.61446	-0.368384	0.641423	0.900903	37
MSTRG.576397.2	chr4	49109481	49119011	+	u	2	4.68426	-0.378276	0.662701	0.901829	41
MSTRG.719277.1	chr6	170145841	170146467	+	u	2	9.56024	0.361155	0.635227	0.902821	35
MSTRG.87700.2	chr10	41884492	41907756	-	u	3	4.96637	0.298216	0.526	0.902947	29
MSTRG.414269.2	chr2	105706812	105713318	-	u	2	108.796	-0.175635	0.309596	0.902947	5
MSTRG.678110.2	chr6	30150011	30151531	+	u	2	20.7316	0.238011	0.420492	0.90314	21
MSTRG.576392.12	chr4	49101378	49106934	-	u	3	4.31795	-0.384608	0.686122	0.904803	43
MSTRG.338517.2	chr18	107911	108281	+	u	2	34.055	-0.391682	0.701055	0.905	32
MSTRG.744284.1	chr7	86594311	86614781	-	u	3	18.1556	-0.356369	0.640605	0.905498	36
MSTRG.454792.1	chr20	62172	63006	-	u	2	32.5874	0.27206	0.490428	0.90602	15
MSTRG.414262.13	chr2	105641575	105687291	+	u	3	10.9541	-0.363113	0.676879	0.911373	41
MSTRG.738229.1	chr7	58195995	58434647	-	u	2	10.8218	-0.278816	0.521403	0.911616	17
MSTRG.116832.2	chr10	133687482	133689055	+	u	2	10.4281	0.367539	0.689028	0.912024	40
MSTRG.321768.2	chr17	36761088	36761695	+	u	2	8.23426	0.377218	0.709369	0.912066	43
MSTRG.592982.1	chr4	116344032	116375006	+	u	4	110.72	0.176083	0.330998	0.912066	6
MSTRG.453338.1	chr2	237923045	237923832	-	u	2	11.3766	0.330264	0.624884	0.913353	39
MSTRG.490135.3	chr22	19725235	19726157	+	u	2	15.8855	-0.295169	0.560569	0.9135	35
MSTRG.705070.1	chr6	125346594	125363467	+	u	3	92.7752	-0.233178	0.443271	0.9135	14
MSTRG.834395.1	chr9	96418815	96419484	-	u	2	12.0886	-0.338142	0.650465	0.915251	42
MSTRG.576392.16	chr4	49103215	49106506	-	u	2	9.76749	0.350426	0.677819	0.916096	38
MSTRG.318966.1	chr17	21972899	21983801	+	u	2	7.31429	0.335884	0.654035	0.916786	37
MSTRG.858817.1	chrX	46378279	46380804	-	u	3	11.0785	-0.313646	0.610559	0.916786	40
MSTRG.546728.1	chr3	152591722	152603083	+	u	4	17.426	-0.182328	0.360812	0.917653	23
MSTRG.5865.1	chr1	12618400	12618893	+	u	2	16.1594	-0.305037	0.609416	0.918155	36
MSTRG.478212.1	chr21	7950021	7950455	-	u	2	8.89169	0.325038	0.649273	0.918155	33
MSTRG.8728.1	chr1	10004	10467	-	u	2	14.1874	-0.303261	0.615808	0.919852	31
MSTRG.41982.3	chr1	143253014	143255390	-	u	2	32.1664	0.31379	0.639701	0.920498	25
MSTRG.110028.4	chr10	111114286	111185145	+	u	6	13.8112	-0.327271	0.67387	0.9218	41
MSTRG.588398.46	chr4	98784672	98862667	-	u	3	24.6645	0.318148	0.658208	0.9224	37
MSTRG.793262.3	chr8	40964833	40984296	-	u	3	54.488	-0.365479	0.76223	0.923298	38
MSTRG.479449.1	chr21	9247048	9247982	+	u	2	13.3543	0.270104	0.579256	0.925058	28
MSTRG.488285.1	chr22	11048733	11049693	-	u	2	23.0088	-0.274858	0.592699	0.925897	24
MSTRG.499936.7	chr22	48198123	48209319	-	u	2	27.2537	-0.336133	0.731057	0.926273	39
MSTRG.501759.5	chr22	50807876	50808468	-	u	2	12.6704	0.196518	0.435541	0.928456	15
MSTRG.863529.8	chrX	65035295	65141576	+	u	5	16.9385	-0.328058	0.729234	0.92897	44
MSTRG.594976.42	chr4	119636141	119657311	-	u	2	84.7282	-0.197785	0.442641	0.929682	17
MSTRG.370918.2	chr19	32205971	32222479	+	u	2	128.993	0.263523	0.596499	0.931438	23
MSTRG.84544.6	chr10	29782433	29784763	-	u	4	20.4489	0.293894	0.677065	0.933865	37
MSTRG.637564.1	chr5	83381852	83398290	+	u	4	53.5823	-0.207318	0.480846	0.934547	20
MSTRG.755803.1	chr7	128111986	128118807	+	u	2	8.50527	-0.306836	0.713628	0.934692	44
MSTRG.478176.2	chr21	7259970	7260590	+	u	2	62.6052	-0.224952	0.529455	0.935002	14
MSTRG.319313.3	chr17	26883591	26885980	+	u	2	125.482	0.156693	0.37072	0.935389	2
MSTRG.410598.7	chr2	91498461	91527948	-	u	4	7.46814	0.216983	0.554932	0.941197	32
MSTRG.478175.1	chr21	7258370	7259830	+	u	2	24.5215	-0.263992	0.677844	0.941386	35
MSTRG.631266.18	chr5	56260696	56264294	+	u	4	29.5262	-0.187496	0.485754	0.941646	21
MSTRG.158093.3	chr11	128051557	128057468	-	u	4	30.575	-0.184393	0.478217	0.941717	20
MSTRG.576392.9	chr4	49097510	49100501	-	u	2	14.2399	-0.223551	0.579907	0.941729	27
MSTRG.212583.1	chr13	47068554	47069710	-	u	2	14.7311	-0.228387	0.597244	0.943062	35
MSTRG.719671.1	chr7	478863	479297	+	u	2	30.6245	0.179557	0.469573	0.943062	8
MSTRG.575764.1	chr4	48063776	48066261	-	u	2	6.25975	-0.193334	0.512222	0.944116	33
MSTRG.115710.13	chr10	131385629	131386930	+	u	3	11.8826	0.271563	0.729361	0.945079	42
MSTRG.41974.1	chr1	143213695	143232126	+	u	2	21.0868	-0.196067	0.536448	0.946749	20
MSTRG.464221.2	chr20	31054717	31062971	+	u	3	8.22858	0.212408	0.586046	0.947112	29
MSTRG.490134.19	chr22	19725236	19726417	-	u	3	48.581	-0.201296	0.569751	0.948638	26
MSTRG.110028.3	chr10	111114282	111122393	+	u	3	45.8254	-0.142959	0.416194	0.949417	16
MSTRG.759651.3	chr7	139036072	139036950	+	u	2	84.7417	-0.167433	0.490894	0.949922	20
MSTRG.406258.1	chr2	75239150	75279670	+	u	3	41.0074	0.188178	0.560397	0.950944	28
MSTRG.43557.36	chr1	144103437	144104874	-	u	2	20.6158	0.223859	0.687274	0.95226	36
MSTRG.370918.4	chr19	32205971	32219544	+	u	2	37.7486	-0.21171	0.652023	0.952691	33
MSTRG.378417.11	chr19	50495145	50496694	+	u	2	12.1501	0.188483	0.580761	0.95272	30
MSTRG.186802.4	chr12	88380269	88419446	-	u	3	28.6083	0.217444	0.693915	0.954216	37
MSTRG.712262.2	chr6	148617686	148621390	+	u	2	17.1312	-0.1288	0.41837	0.956	26
MSTRG.284352.6	chr15	101094136	101097166	+	u	3	13.4401	0.204945	0.679419	0.957233	38
MSTRG.712262.1	chr6	148617676	148646513	+	u	4	81.9186	-0.194735	0.663726	0.959685	33
MSTRG.327549.2	chr17	50793268	50795294	+	u	3	65.5459	-0.189269	0.659148	0.960745	31
MSTRG.882031.3	chrX	156029891	156030811	-	u	3	2.65506	0.14652	0.522629	0.961375	36
MSTRG.409894.1	chr2	87395833	87411469	+	u	3	5.6792	0.153069	0.55368	0.96268	35
MSTRG.649702.4	chr5	123721813	123900214	+	u	2	81.1547	-0.116372	0.426802	0.963606	16
MSTRG.202815.1	chr13	19865462	19956613	+	u	4	9.40546	0.166557	0.628459	0.964368	40
MSTRG.631865.1	chr5	62232862	62241637	+	u	2	15.8597	-0.150511	0.588872	0.965154	34
MSTRG.760918.11	chr7	142472079	142473305	+	u	2	8.90029	0.154915	0.5984	0.965154	40
MSTRG.849484.2	chrX	2213124	2214498	+	u	2	16.2327	-0.134208	0.517991	0.965154	19
MSTRG.257417.1	chr14	102919544	102921375	-	u	2	9.71749	-0.141088	0.561238	0.965428	29
MSTRG.319311.3	chr17	26937864	26940696	+	u	2	4.82237	0.171852	0.69087	0.965982	42
MSTRG.370918.3	chr19	32205971	32222479	+	u	2	97.4471	-0.15457	0.648485	0.967143	30
MSTRG.263828.9	chr15	36422813	36428432	-	u	4	107.67	0.183928	0.796317	0.968555	38
MSTRG.409894.60	chr2	87418096	87418799	+	u	2	27.724	0.1413	0.61317	0.968555	31
MSTRG.160009.6	chr12	10026	10373	+	u	2	5.80848	-0.12633	0.550379	0.968673	30
MSTRG.126177.1	chr11	33893835	33921172	+	u	4	23.8567	-0.134953	0.606408	0.969502	33
MSTRG.409894.32	chr2	87414344	87416907	+	u	3	9.38641	-0.148702	0.668805	0.969502	37
MSTRG.488232.2	chr22	10928181	10929089	-	u	2	4.9476	-0.1155	0.532711	0.971081	31
MSTRG.576405.1	chr4	49140519	49153308	-	u	2	7.29083	0.160054	0.74226	0.971292	43
MSTRG.3349.6	chr1	4603650	4622250	+	u	4	34.4764	-0.109939	0.524078	0.971654	28
MSTRG.856853.1	chrX	40006338	40008078	+	u	2	15.9593	0.101081	0.486213	0.971811	29
MSTRG.486459.3	chr21	42455102	42455998	-	u	2	13.0796	0.118188	0.573522	0.972201	34
MSTRG.594976.40	chr4	119636002	119657311	-	u	2	71.7421	-0.0913626	0.445764	0.972327	18
MSTRG.852308.2	chrX	16106996	16119664	-	u	3	42	0.088185	0.449162	0.974092	17
MSTRG.550814.3	chr3	168845601	168846603	-	u	2	13.2697	0.146218	0.751957	0.974461	44
MSTRG.186802.2	chr12	88316806	88419446	-	u	3	44.5574	-0.083536	0.433986	0.974812	19
MSTRG.576396.2	chr4	49108268	49145686	+	u	2	5.64182	0.122684	0.637407	0.974812	39
MSTRG.110041.1	chr10	111146975	111150867	-	u	3	22.2603	-0.0745432	0.406029	0.97567	19
MSTRG.295421.1	chr16	46386119	46411124	+	u	3	34.1759	0.0880836	0.479221	0.97567	8
MSTRG.63148.2	chr1	211605964	211614182	-	u	2	7.18838	0.0870763	0.475537	0.97583	35
MSTRG.409894.67	chr2	87421941	87431598	+	u	4	28.505	0.0975446	0.534117	0.975901	21
MSTRG.8727.32	chr1	10005	10404	+	u	2	84.066	0.0890535	0.491705	0.976123	14
MSTRG.615122.3	chr5	2145396	2147137	-	u	3	26.7873	-0.103592	0.591178	0.977163	24
MSTRG.252636.1	chr14	92750350	92753525	+	u	2	220.029	0.0511986	0.294011	0.977529	2
MSTRG.87697.3	chr10	41864645	41902354	+	u	4	8.26817	0.0976035	0.563792	0.977665	30
MSTRG.255410.1	chr14	99285038	99287467	-	u	2	8.5428	-0.111503	0.672497	0.978223	42
MSTRG.649702.1	chr5	123721813	123994879	+	u	4	14.7663	0.105605	0.633844	0.978223	36
MSTRG.863529.13	chrX	65052053	65090600	+	u	4	17.3129	-0.116834	0.70478	0.978223	40
MSTRG.114788.4	chr10	129035149	129036864	-	u	3	148.781	0.0675423	0.432804	0.978856	15
MSTRG.410159.1	chr2	90392524	90394884	+	u	2	18.1504	-0.0898472	0.579316	0.978927	24
MSTRG.615122.2	chr5	2145348	2147004	-	u	4	11.3719	0.107407	0.696717	0.97903	38
MSTRG.675974.6	chr6	24720066	24720925	-	u	2	53.2697	-0.0722153	0.479217	0.97981	19
MSTRG.560796.2	chr3	198136073	198139856	-	u	2	49.4012	-0.0624147	0.415228	0.979811	17
MSTRG.849256.2	chrX	1571053	1583299	+	u	3	21.0248	0.0621018	0.421633	0.98037	22
MSTRG.328859.1	chr17	56773186	56777949	+	u	2	9.23221	0.0675759	0.470882	0.980864	31
MSTRG.409869.11	chr2	88659143	88664684	+	u	2	77.1243	0.0674809	0.49329	0.982232	20
MSTRG.263828.13	chr15	36423741	36428432	-	u	3	57.6782	0.103553	0.758384	0.982239	38
MSTRG.319312.1	chr17	26881205	26885980	-	u	2	54.8031	-0.0593467	0.447765	0.983107	4
MSTRG.350496.1	chr18	46156679	46157671	+	u	2	9.28953	0.0924972	0.703699	0.983112	43
MSTRG.186802.5	chr12	88381143	88419446	-	u	3	117.138	-0.0324659	0.275828	0.98436	3
MSTRG.385256.1	chr2	10953820	10954164	+	u	2	11.1681	0.0726342	0.60218	0.98436	29
MSTRG.406258.2	chr2	75239172	75279670	+	u	4	34.9034	0.0685332	0.564259	0.98436	25
MSTRG.486461.1	chr21	42449073	42452527	-	u	2	7.08361	-0.0612645	0.510537	0.98436	36
MSTRG.712263.1	chr6	148617781	148642349	-	u	3	36.6077	0.0523118	0.454457	0.984367	19
MSTRG.414262.12	chr2	105641571	105678916	+	u	4	38.4411	-0.0586682	0.521015	0.984683	27
MSTRG.490134.27	chr22	19725363	19726417	-	u	2	16.8272	0.051359	0.461714	0.9848	21
MSTRG.293855.1	chr16	29926308	29926835	+	u	2	10.4905	-0.0689831	0.653216	0.98572	40
MSTRG.881486.1	chrX	122851532	122852095	+	u	2	10.1709	-0.0585127	0.583025	0.98638	36
MSTRG.8727.25	chr1	10003	10484	+	u	2	26.2457	-0.0795814	0.832121	0.987659	44
MSTRG.284579.1	chr15	101254254	101255781	-	u	3	393.793	-0.0278355	0.304487	0.988139	3
MSTRG.606898.1	chr4	167456268	167509607	-	u	2	3.0518	-0.0463548	0.58879	0.988706	39
MSTRG.3349.4	chr1	4603650	4622250	+	u	3	47.4813	-0.041963	0.542323	0.988708	27
MSTRG.628102.8	chr5	49657971	49667358	+	u	4	12.9246	0.0326587	0.462293	0.989418	13
MSTRG.129546.1	chr11	44701468	44709828	+	u	3	46.4268	0.0198314	0.288175	0.989618	8
MSTRG.409998.2	chr2	89820776	89832512	+	u	3	4.73733	-0.0440997	0.664949	0.989793	40
MSTRG.372533.2	chr19	35213381	35215935	+	u	2	11.153	0.038835	0.628787	0.990797	42
MSTRG.814139.1	chr9	10696577	10764896	+	u	2	57.8584	-0.0347538	0.55832	0.990797	27
MSTRG.278825.3	chr15	85837875	85845050	-	u	2	7.66464	0.0310562	0.572758	0.991657	40
MSTRG.414262.11	chr2	105641564	105677917	+	u	4	33.2947	-0.0272929	0.573181	0.992485	31
MSTRG.409894.5	chr2	87398723	87419873	+	u	3	8.334	0.0283938	0.609406	0.992559	38
MSTRG.719944.1	chr7	1272106	1272487	+	u	2	14.3761	0.0226386	0.523118	0.992732	19
MSTRG.160009.2	chr12	10020	10311	+	u	2	9.03211	0.0186049	0.480228	0.993313	23
MSTRG.863529.12	chrX	65051462	65151667	+	u	4	21.4023	0.0253905	0.649426	0.993313	34
MSTRG.649702.3	chr5	123721813	123900214	+	u	4	47.4265	0.018682	0.595904	0.994863	30
MSTRG.318963.1	chr17	21884322	21987808	+	u	2	14.4449	-0.0171522	0.603683	0.994999	28
MSTRG.443470.1	chr2	208064688	208077106	+	u	4	7.99975	-0.0179456	0.665878	0.995223	44
MSTRG.715072.3	chr6	144211692	144217633	-	u	3	15.8491	-0.0116021	0.449254	0.995354	28
MSTRG.3349.5	chr1	4603650	4619770	+	u	4	15.3993	0.014367	0.645337	0.996268	37
MSTRG.475879.2	chr20	62229409	62230757	-	u	2	9.00414	-0.0153175	0.704536	0.99639	43
MSTRG.849484.3	chrX	2213405	2214498	+	u	3	36.6914	-0.00366192	0.378011	0.998633	4
MSTRG.478149.11	chr21	6565398	6566093	-	u	3	5.10943	-0.00459246	0.542592	0.998777	34
MSTRG.501759.3	chr22	50807837	50808468	-	u	2	6.79797	0.00174906	0.620346	0.999628	36
