# Supplementary material for: Identifying Candidate Circulating RNA Markers for Coronary Artery Disease by Deep RNA-Sequencing in Human Plasma
Source: Cells. 2022 Oct 11;11(20):3191. doi: 10.3390/cells11203191 (PMC9599983; doi:10.3390/cells11203191)
Supplement: Supplementary file 1 [file cells-11-03191-s001.zip › SuppTableS3_circRNAs.xlsx]

## Sheet: Sheet1
Gene name	Chromosome	Start position	Stop position	Strand	Mean Number of Reads Mapping in Controls	Log2 Fold Change in Patients compared with Controls	Log2 Fold Change Standard Error	P-value Adjusted for Multiple Comparisons	Number of samples in which circRNA was not detected
UBAC2	chr13	99238426	99244624	+	696.016	0.433866	0.15786	0.0470364	0
CLNS1A	chr11	77619605	77625818	-	21.4413	0.738416	0.284295	0.065036	6
ASH2L	chr8	38114191	38119363	+	149.343	0.405887	0.169102	0.092905	0
PHF21A	chr11	46076753	46092223	-	39.2369	-0.637421	0.278318	0.115642	8
ZNF362	chr1	33294936	33295305	+	126.379	0.470606	0.209294	0.122928	1
FIP1L1	chr4	53414614	53428183	+	389.183	0.401756	0.185193	0.142586	0
PTGES3	chr12	56666203	56670364	-	89.7304	0.540243	0.253831	0.153018	5
PTTG1IP	chr21	44855209	44861271	-	60.3721	0.5616	0.267787	0.159886	6
LINS1	chr15	100564691	100565265	-	89.0363	0.57856	0.28148	0.170017	2
LCOR	chr10	96907264	96907747	+	265.47	0.46903	0.238264	0.193317	1
CDK17	chr12	96298868	96300360	-	183.53	0.37172	0.189433	0.195258	0
RHOBTB3	chr5	95755395	95763620	+	177.024	0.419863	0.227031	0.2299	2
RNF168	chr3	196487398	196488683	-	418.22	0.23397	0.128054	0.236424	0
SPPL3	chr12	120782654	120784593	-	1277.91	0.297064	0.165034	0.245145	0
BROX	chr1	222724091	222725555	+	97.3656	0.463265	0.27064	0.268853	6
ZNF430	chr19	21033455	21034184	+	43.989	-0.477522	0.282981	0.27632	4
SLAIN2	chr4	48369848	48383784	+	178.222	-0.29627	0.179565	0.291736	1
DYRK1A	chr21	37420298	37421866	+	194.885	0.27858	0.169366	0.293089	0
EFCAB13	chr17	47402131	47409691	+	67.1186	-0.471459	0.286656	0.293089	7
N4BP2L2	chr13	32517856	32527532	-	112.749	-0.351103	0.216133	0.300515	1
CEP350	chr1	180003173	180006567	+	81.8275	0.401787	0.24901	0.304953	3
NPAT	chr11	108176245	108177090	-	99.7132	-0.401807	0.250718	0.309227	4
FIP1L1	chr4	53425871	53428183	+	801.602	0.276345	0.176841	0.323634	0
NPM1	chr5	171392709	171392978	+	124.589	0.302193	0.197319	0.335034	0
TOP1	chr20	41092471	41101353	+	54.1546	0.458514	0.301986	0.34156	8
TRAPPC9	chr8	140397619	140405698	-	68.7373	0.433213	0.285385	0.341583	7
ZC3H6	chr2	112299848	112300029	+	674.566	0.188881	0.125758	0.34731	0
ASAP1	chr8	130152735	130169067	-	233.316	0.313649	0.211835	0.356997	0
GSE1	chr16	85633913	85634132	+	1845.58	0.298723	0.204823	0.365569	0
AL035461.4	chr20	6031284	6032080	+	104.216	0.40025	0.276959	0.370454	5
CEP70	chr3	138570317	138572932	-	50.1276	-0.405785	0.287605	0.384801	8
ROCK2	chr2	11286538	11287736	-	279.374	0.359807	0.255928	0.38561	4
PTPN12	chr7	77581426	77583650	+	132.254	0.334553	0.239672	0.389746	3
FIP1L1	chr4	53425871	53444103	+	115.558	0.334542	0.239772	0.389825	4
TAOK1	chr17	29451454	29451680	+	175.137	0.301885	0.219015	0.397272	1
PTPN12	chr7	77585542	77600806	+	320.18	-0.288839	0.209726	0.397283	1
NCOA3	chr20	47623910	47633636	+	63.0212	0.341105	0.248516	0.398431	6
MITD1	chr2	99169549	99171429	-	166.916	0.278471	0.203253	0.399419	2
SLTM	chr15	58912562	58916999	-	243.469	-0.287959	0.212395	0.405169	0
PHC3	chr3	170136418	170149244	-	72.5128	0.326798	0.242452	0.409427	3
UBAP2	chr9	33960825	33989126	-	111.392	0.305768	0.22746	0.409801	2
DNAJC16	chr1	15534236	15536814	+	129.807	-0.277041	0.209661	0.420278	2
MED12L	chr3	151116337	151127984	+	105.112	-0.274689	0.211181	0.429002	3
SCLT1	chr4	128936654	128970468	-	65.6827	-0.343437	0.264956	0.431174	6
MAN1A2	chr1	117402185	117405645	+	180.923	0.246572	0.1911	0.433783	0
SPPL3	chr12	120782654	120810886	-	136.827	0.288388	0.224849	0.43712	3
RAD23B	chr9	107300140	107311737	+	79.041	0.381943	0.299298	0.440576	7
BRWD1	chr21	39206107	39212707	-	65.6988	-0.376636	0.298727	0.447481	8
MPP7	chr10	28147482	28150059	-	237.146	0.297603	0.237342	0.451405	2
RAB1A	chr2	65090982	65098066	-	164.998	0.232225	0.193995	0.478425	0
CCDC9	chr19	47264602	47264946	+	73.8022	0.295458	0.247507	0.479794	3
FIP1L1	chr4	53383772	53389873	+	617.647	0.203008	0.171195	0.483013	0
SMARCA5	chr4	143543508	143543972	+	1289.1	-0.141995	0.119987	0.483947	0
APLF	chr2	68567340	68578003	+	198.21	0.263614	0.226366	0.493125	3
PTPRA	chr20	2964271	2965202	+	181.526	0.214089	0.185241	0.497719	0
SPPL3	chr12	120782654	120791557	-	168.505	0.258515	0.227405	0.508396	2
UBXN7	chr3	196391812	196403019	-	1877.25	0.151457	0.134824	0.51421	0
PPP6R3	chr11	68551120	68564432	+	97.6386	-0.219018	0.195357	0.515139	2
PNN	chr14	39179090	39179462	+	358.077	0.18948	0.17039	0.520094	0
SUPT5H	chr19	39453355	39453521	+	60.3916	0.229888	0.207706	0.522462	3
LRCH1	chr13	46723220	46733998	+	89.2057	0.187864	0.170895	0.524911	0
BBX	chr3	107710451	107716849	+	47.6892	0.284682	0.263231	0.534587	7
DAAM1	chr14	59263440	59291306	+	157.278	-0.273809	0.256128	0.539718	4
SCLT1	chr4	128992166	129003876	-	412.711	0.182415	0.171307	0.541316	0
GNB1	chr1	1815755	1825499	-	317.025	0.183469	0.176953	0.55299	0
FARSA	chr19	12928341	12928847	-	205.486	0.223845	0.216909	0.555117	2
ACVR2A	chr2	147896300	147899898	+	97.0473	0.283976	0.277807	0.560791	4
EFCAB13	chr17	47402131	47414919	+	522.574	-0.169836	0.168372	0.565227	0
ASPH	chr8	61680967	61684188	-	77.0852	-0.317688	0.314413	0.565227	7
PDXDC1	chr16	14997752	14998405	+	70.8429	0.291547	0.300344	0.583058	4
KMT2C	chr7	152249875	152250966	-	54.4288	-0.303179	0.313053	0.583389	8
PCNP	chr3	101585436	101590270	+	43.9554	0.287354	0.296496	0.583389	6
DEK	chr6	18236451	18258405	-	68.4015	-0.264947	0.27756	0.589407	7
WDR41	chr5	77463094	77464809	-	96.4864	0.205378	0.21931	0.597078	2
PIP4K2A	chr10	22591628	22609717	-	196.759	0.189765	0.202833	0.597369	1
HNRNPM	chr19	8455404	8463686	+	200.201	0.173509	0.187096	0.601784	0
HOOK3	chr8	42906172	42943445	+	66.0759	0.287797	0.317435	0.611023	7
GNB1	chr1	1815755	1839238	-	17.7757	0.292962	0.323041	0.611023	6
RUNX1	chr21	34834409	34859578	-	320.818	-0.199964	0.221532	0.612216	0
SYF2	chr1	25227441	25228235	-	70.2417	0.233373	0.259014	0.613052	3
VMP1	chr17	59731420	59738947	+	116.382	0.171122	0.192579	0.619546	2
RAP1B	chr12	68650399	68652051	+	226.495	0.198517	0.224168	0.620548	1
SLC25A43	chrX	119410189	119410362	+	253.71	0.173293	0.197116	0.624287	0
TLK1	chr2	171028338	171046362	-	135.009	-0.246343	0.28176	0.626777	5
NRIP1	chr21	15014343	15043574	-	120.526	0.207313	0.237307	0.62717	0
VAPB	chr20	58438944	58441083	+	257.269	0.152205	0.174504	0.627364	0
VPS13C	chr15	62007307	62013992	-	123.195	-0.197144	0.227353	0.62953	2
NUCKS1	chr1	205723925	205729621	-	181.47	0.174754	0.202727	0.632501	0
AC004076.1	chr19	57455652	57456182	-	153.916	-0.216667	0.254917	0.63828	2
CALD1	chr7	134958068	134958290	+	141.396	0.2601	0.307014	0.638987	7
RAP1B	chr12	68654111	68654252	+	132.969	0.23267	0.27439	0.638987	5
RBM39	chr20	35729311	35732135	-	110.061	0.181646	0.215836	0.64234	2
GNB1	chr1	1825396	1839238	-	33.048	-0.272054	0.324532	0.644546	7
CUX1	chr7	102227366	102227669	+	46.7947	0.23627	0.286028	0.650885	7
VAMP3	chr1	7777159	7778169	+	271.204	-0.151847	0.184412	0.652383	1
PLOD2	chr3	146121111	146124229	-	93.0079	0.227719	0.276591	0.652383	5
PIP4K2A	chr10	22567850	22609717	-	73.9258	-0.234715	0.287774	0.655895	4
MSANTD3-TMEFF1	chr9	100498764	100516771	+	68.6583	0.23595	0.290167	0.656258	8
RSU1	chr10	16752538	16782084	-	324.592	0.172225	0.213511	0.660545	1
RBM5	chr3	50108069	50108304	+	46.8124	0.211048	0.262842	0.66273	6
EXOC6B	chr2	72718102	72733118	-	170.07	-0.173987	0.218689	0.666043	2
RCAN3	chr1	24514313	24514567	+	131.359	0.182495	0.229698	0.666465	2
RUFY1	chr5	179591624	179593645	+	105.268	0.238359	0.304618	0.672292	6
UBE2Q2	chr15	75868950	75873568	+	177.144	0.156016	0.20216	0.678364	1
TPM4	chr19	16088026	16093753	+	69.2365	0.212107	0.279774	0.684048	5
SYNCRIP	chr6	85618817	85619417	-	50.1859	0.197688	0.260693	0.684048	6
CWC27	chr5	64788950	64804386	+	84.784	0.203962	0.271024	0.686888	6
UBXN7	chr3	196391812	196393619	-	51.9362	-0.178851	0.240897	0.691658	1
TMED2	chr12	123586746	123590449	+	147.854	0.184624	0.250245	0.69387	5
UGP2	chr2	63856305	63857936	+	100.851	-0.16866	0.230062	0.696013	4
PCGF6	chr10	103347237	103347450	-	65.304	0.215268	0.299031	0.703014	8
SPIDR	chr8	47396375	47407961	+	135.275	0.132747	0.185553	0.705721	2
YPEL2	chr17	59353214	59353526	+	84.9873	-0.182377	0.256472	0.708014	7
FBXW7	chr4	152411302	152412529	-	170.168	0.0910547	0.131445	0.714745	0
SEC11A	chr15	84680712	84691644	-	91.5282	-0.182724	0.264631	0.714841	6
MND1	chr4	153394261	153397333	+	142.152	0.174483	0.255077	0.716603	4
FAM13B	chr5	137985256	137988315	-	500.022	-0.117288	0.172625	0.717577	0
UBE2Q2	chr15	75859877	75873568	+	368.281	0.112146	0.165052	0.717577	0
LARP1B	chr4	128074459	128077962	+	94.3405	-0.173521	0.254693	0.717577	3
SIRT5	chr6	13579450	13584225	+	88.396	0.16843	0.24916	0.71958	4
CFLAR	chr2	201145377	201149835	+	332.082	-0.0814703	0.121498	0.721703	0
ZNF148	chr3	125313307	125331238	-	57.7726	-0.19521	0.294431	0.726601	9
TLK1	chr2	171046173	171050174	-	68.5924	-0.213593	0.32508	0.729325	9
KLHL8	chr4	87195323	87195690	-	68.032	-0.171145	0.261988	0.730973	4
CDYL	chr6	4891712	4892379	+	72.2322	-0.145052	0.228686	0.737601	5
RFC1	chr4	39326562	39327756	-	74.197	0.183325	0.292485	0.742262	8
POLR3G	chr5	90495676	90506674	+	182.229	0.151416	0.242292	0.743483	2
PTPN12	chr7	77581426	77592256	+	73.3007	-0.182438	0.29351	0.744959	8
FCHSD2	chr11	72984087	72989097	-	66.2829	-0.192742	0.312289	0.746437	8
MEMO1	chr2	31917925	31932135	-	69.8563	0.195678	0.31793	0.747258	5
MIER1	chr1	66958058	66963160	+	337.641	0.112242	0.183299	0.74802	0
XPO1	chr2	61522610	61533903	-	114.779	-0.14142	0.233235	0.751429	3
ATRX	chrX	77652113	77656653	-	209.357	0.0920149	0.155527	0.758084	0
UXS1	chr2	106145189	106166083	-	73.9234	0.167662	0.285428	0.760177	5
MCU	chr10	72708282	72715902	+	59.4073	-0.149927	0.262686	0.765915	2
RHBDD1	chr2	226864603	226867318	+	49.4436	-0.15997	0.296215	0.782131	8
CDK8	chr13	26400452	26401624	+	49.0171	0.143356	0.267423	0.784042	8
MCU	chr10	72715110	72715902	+	73.879	0.155581	0.29152	0.7851	5
SRSF4	chr1	29154695	29154910	-	49.5961	-0.126309	0.23652	0.7851	4
SLTM	chr15	58912562	58913696	-	121.745	-0.117756	0.227241	0.793003	3
UBAP2	chr9	33986759	34017189	-	90.7836	-0.13243	0.25547	0.793003	4
NCOA2	chr8	70213902	70216764	-	78.7773	-0.152988	0.295238	0.793003	3
TBC1D1	chr4	38089931	38103157	+	56.0679	0.148239	0.286893	0.793897	6
AC009022.1	chr16	70042350	70043003	-	41.5611	0.135609	0.26364	0.79518	6
EIF3J	chr15	44550875	44551522	+	197.124	0.081313	0.162108	0.80123	0
MBOAT2	chr2	8943186	8958642	-	68.0038	-0.144471	0.288055	0.80123	7
MDM1	chr12	68302619	68302872	-	100.074	0.132835	0.26802	0.803462	6
TMEM165	chr4	55411613	55417985	+	124.141	0.0961101	0.197384	0.807457	3
ARHGEF12	chr11	120406117	120407823	+	123.307	0.0960132	0.201192	0.811439	0
SIAE	chr11	124647364	124648175	-	116.302	0.144127	0.305701	0.814633	6
RSRC1	chr3	158122102	158123991	+	151.446	-0.0982681	0.2103	0.816602	1
UBXN4	chr2	135769768	135770735	+	93.3322	0.100775	0.216672	0.817483	2
TERF2	chr16	69370482	69372355	-	50.7803	0.135614	0.294809	0.820362	8
TNPO3	chr7	129014978	129018157	-	44.8278	0.133089	0.289491	0.820362	8
RAP1B	chr12	68654111	68657217	+	77.1304	0.120186	0.262482	0.821224	5
OPHN1	chrX	68192918	68201710	-	127.665	-0.110634	0.26083	0.836904	5
CORO1C	chr12	108652271	108654410	-	603.185	0.0822661	0.195625	0.83875	1
ANKRD12	chr18	9182381	9221999	+	140.22	-0.105294	0.252787	0.841128	4
ERBIN	chr5	65988634	65994864	+	133.144	-0.0966474	0.235168	0.841851	3
MBOAT2	chr2	8908620	8958642	-	104.418	0.0805347	0.197471	0.843083	3
SCLT1	chr4	129039040	129082373	-	87.1517	0.115864	0.287185	0.846127	6
RAP1B	chr12	68650399	68654252	+	401.093	-0.0742264	0.184219	0.846339	0
PCMTD1	chr8	51860844	51861246	-	550.227	-0.0618199	0.156152	0.848792	0
CD109	chr6	73723250	73736508	+	69.9228	-0.126022	0.323958	0.85201	8
ASAP1	chr8	130152735	130180880	-	248.171	-0.0621673	0.161912	0.855183	0
SLC9A9	chr3	143795000	143796903	-	63.3895	-0.109315	0.294244	0.861694	6
CSNK1G3	chr5	123545416	123557564	+	54.6245	-0.106272	0.287219	0.861984	6
ASPH	chr8	61618977	61644632	-	88.1936	0.112972	0.305807	0.862042	8
NBAS	chr2	15551492	15558634	-	64.1783	0.104019	0.283792	0.862526	8
RBM23	chr14	22909482	22911403	-	106.105	0.0625454	0.174833	0.866299	0
RAB6A	chr11	73707419	73718718	-	202.793	0.0700776	0.200247	0.870522	2
TPM3	chr1	154172907	154173201	-	106.883	0.0781158	0.222889	0.870522	3
PICALM	chr11	86022366	86031611	-	58.268	-0.0912612	0.264157	0.872536	6
TAOK1	chr17	29451454	29467216	+	100.451	0.101531	0.302441	0.875406	8
PDCD11	chr10	103438014	103438808	+	87.2266	0.0837848	0.251308	0.875634	4
POMT1	chr9	131506113	131506453	+	35.6839	0.099077	0.299931	0.876541	8
ATXN2	chr12	111552279	111555919	-	64.7629	-0.0994375	0.302426	0.877219	8
STK39	chr2	168161786	168182090	-	133.205	-0.0680976	0.215637	0.88467	1
EPSTI1	chr13	42953947	42970670	-	41.9131	0.0980579	0.315033	0.887242	7
ERBIN	chr5	66012048	66014725	+	76.6905	-0.0895692	0.292899	0.888529	7
FANCL	chr2	58198593	58232112	-	44.5375	-0.0955809	0.320471	0.891278	9
AL669831.4	chr1	805798	810170	-	36.378	-0.102757	0.346501	0.89163	8
LRCH3	chr3	197865422	197875775	+	75.4573	0.0784087	0.267915	0.893433	5
PSME3IP1	chr16	57164000	57173869	-	75.1085	0.0773901	0.265306	0.893433	4
DNAJC2	chr7	103321931	103322794	-	111.295	-0.0601819	0.207297	0.893474	2
UBAP2	chr9	33971650	33973237	-	32.7843	-0.085238	0.296916	0.895422	4
ECPAS	chr9	111386376	111391824	-	90.4544	0.0810217	0.291628	0.899297	9
HIPK3	chr11	33286412	33287511	+	46.446	-0.0777793	0.28034	0.899334	6
MAN1A2	chr1	117402185	117442325	+	66.2296	-0.068236	0.255218	0.90346	5
MARK3	chr14	103451917	103457212	+	63.1916	-0.07159	0.267836	0.90346	3
GDI2	chr10	5794884	5800705	-	52.3248	-0.0745399	0.2814	0.904707	7
FANCL	chr2	58221941	58232112	-	219.582	0.0575002	0.21864	0.905163	1
RNF214	chr11	117279907	117280259	+	179.795	-0.0564106	0.217017	0.906483	4
TADA2A	chr17	37440504	37440662	+	36.4585	0.0662936	0.271974	0.912874	4
RSF1	chr11	77691158	77693611	-	43.5342	-0.0652523	0.271501	0.915631	6
NLK	chr17	28163542	28172618	+	118.204	-0.0534049	0.225012	0.916996	3
CWF19L2	chr11	107390073	107392895	-	74.4316	-0.0619098	0.269797	0.91888	4
CLK1	chr2	200856681	200856985	-	52.7328	0.0682553	0.306376	0.921567	8
EXOC6B	chr2	72731006	72733118	-	423.317	0.0374819	0.181882	0.926913	0
PTPRA	chr20	2947981	2965202	+	112.466	0.0387846	0.192109	0.92959	1
AC135983.3	chr15	32526812	32533368	-	112.283	0.0511792	0.256098	0.930347	3
RPRD1A	chr18	36026899	36033837	-	64.8953	-0.043035	0.218715	0.931504	2
UXS1	chr2	106158057	106166083	-	1056.39	0.0311902	0.162058	0.932682	0
RBM23	chr14	22906194	22911403	-	55.0455	0.0509831	0.265116	0.932682	4
DNAJC3	chr13	95723241	95725252	+	68.2874	-0.0572699	0.307563	0.935119	7
USP25	chr21	15762890	15766141	+	93.7541	0.034811	0.192936	0.938161	3
EMC2	chr8	108449822	108455930	+	113.186	-0.0442095	0.252648	0.940058	5
RBM33	chr7	155672866	155680908	+	415.725	-0.0239714	0.140467	0.941466	0
DGKD	chr2	233388256	233390483	+	74.8798	-0.0546523	0.334925	0.943975	8
CCDC66	chr3	56592969	56594028	+	54.2339	-0.0393452	0.2455	0.944799	7
ARHGEF12	chr11	120406117	120409450	+	74.8191	-0.0304134	0.279651	0.967576	6
PRKCB	chr16	24032135	24035547	+	103.588	-0.028423	0.264211	0.967976	4
PAN3	chr13	28256291	28261458	+	41.1367	0.0243798	0.257315	0.973066	3
PIP4K2A	chr10	22607926	22609717	-	161.292	0.0188849	0.219004	0.975599	2
RBM33	chr7	155665174	155680908	+	64.0959	0.0196139	0.271983	0.979727	6
SMC1A	chrX	53403565	53403893	-	160.601	0.0132714	0.200777	0.980016	2
KPNA5	chr6	116689319	116692392	+	241.782	-0.00919083	0.149399	0.981981	0
MAN1A2	chr1	117402185	117420649	+	260.601	0.00885121	0.161364	0.984141	0
LRRFIP2	chr3	37129062	37149038	-	169.475	0.012427	0.232105	0.984922	3
SPECC1L	chr22	24302194	24313466	+	139.872	-0.00982463	0.211256	0.987925	2
RBM6	chr3	50065030	50066502	+	145.591	0.0116955	0.256489	0.987925	5
TPTEP1	chr22	16637039	16638740	+	43.7556	0.0140288	0.314053	0.987925	7
UBXN2A	chr2	23958300	23977075	+	55.6536	0.00945643	0.290671	0.990832	7
SEPTIN6	chrX	119640691	119653040	-	93.0948	0.00516109	0.24988	0.993695	6
DYNC1LI1	chr3	32541036	32545965	-	72.1472	0.00446211	0.235058	0.994595	5
EMC2	chr8	108449822	108450492	+	109.466	0.00395136	0.21439	0.99462	2
APPL1	chr3	57242855	57248351	+	56.2076	-0.00480257	0.280742	0.995212	7
